# Supplementary material for: The German trial on Aciclovir and Corticosteroids in Herpes-simplex-virus-Encephalitis (GACHE): a multicenter, randomized, double-blind, placebo-controlled trial
Source: PubMed Central journal article supplement (PMC7650106; doi:10.1186/s42466-019-0031-3), 2019-09-12
Supplement: 42466_2019_31_MOESM1_ESM.pdf [file 42466_2019_31_MOESM1_ESM.pdf]

## Contents

|                                                                                             |    |
|---------------------------------------------------------------------------------------------|----|
| Signatures.....                                                                             | 2  |
| 1 Abbreviations and definitions .....                                                       | 5  |
| 1.1 Tables .....                                                                            | 6  |
| 1.2 Figures .....                                                                           | 8  |
| 2 Objective of the trial.....                                                               | 9  |
| 3 Study design .....                                                                        | 9  |
| 4 Treatment.....                                                                            | 9  |
| 5 Aims of the trial .....                                                                   | 9  |
| 6 Analysis sets .....                                                                       | 10 |
| 7 Data handling .....                                                                       | 10 |
| 8 Handling of unresolved data issues.....                                                   | 10 |
| 9 Statistical methods.....                                                                  | 11 |
| 9.1 Demographics and baseline characteristics .....                                         | 11 |
| 9.2 Primary endpoint.....                                                                   | 11 |
| 9.2.1 Interim analysis .....                                                                | 11 |
| 9.2.2 Sensitivity analyses for the primary endpoint.....                                    | 11 |
| 9.3 Secondary endpoints.....                                                                | 12 |
| 9.4 Safety.....                                                                             | 13 |
| 9.5 Differences to trial protocol specified in the SAP .....                                | 13 |
| 9.6 Analyses not prespecified, more detailed specifications and differences to the SAP..... | 14 |
| 9.7 Interpretation of results .....                                                         | 14 |
| 9.8 Software .....                                                                          | 14 |
| 10 Results .....                                                                            | 15 |
| 10.1 Flow chart of enrolled patients .....                                                  | 15 |
| 10.2 Inclusion/exclusion criteria .....                                                     | 16 |
| 10.3 Demographics and baseline characteristics .....                                        | 17 |
| 10.3.1 Full analysis set.....                                                               | 17 |
| 10.3.2 Per protocol set .....                                                               | 28 |
| 10.4 Primary endpoint.....                                                                  | 38 |
| 10.4.1 Full analysis set.....                                                               | 38 |
| 10.4.2 Sensitivity analyses.....                                                            | 38 |

|        |                                                 |     |
|--------|-------------------------------------------------|-----|
| 10.5   | Secondary endpoints.....                        | 40  |
| 10.5.1 | Mortality.....                                  | 40  |
| 10.5.2 | Glasgow outcome scale: GOS.....                 | 42  |
| 10.5.3 | Quality of life (EuroQol 5D) .....              | 43  |
| 10.5.4 | Functional outcome (mRS) .....                  | 47  |
| 10.5.5 | Neuropsychological testing at month 6 .....     | 51  |
| 10.5.6 | Barthel index .....                             | 64  |
| 10.5.7 | NIH-scale.....                                  | 74  |
| 10.6   | Safety.....                                     | 92  |
| 10.6.1 | Physical examination and vital signs .....      | 92  |
| 10.6.2 | Adverse events .....                            | 100 |
| 10.7   | Applied study medication.....                   | 125 |
| 10.7.1 | Full analysis set.....                          | 125 |
| 10.7.2 | Per protocol set.....                           | 126 |
| 10.8   | Study termination.....                          | 127 |
| 10.9   | Other analyses.....                             | 128 |
| 10.9.1 | Seizures.....                                   | 128 |
| 11     | References.....                                 | 129 |
| 12     | Listings.....                                   | 130 |
| 12.1   | Excluded patients .....                         | 130 |
| 12.2   | Adverse events/serious adverse event .....      | 132 |
| 13     | Appendix.....                                   | 138 |
| 13.1   | Original SAS® output for primary endpoint ..... | 138 |
|        | Unresolved data issues.....                     | 139 |

## 1 Abbreviations and definitions

| Abbreviation | Definition                                                 |
|--------------|------------------------------------------------------------|
| AE           | Adverse Event                                              |
| AVLT         | Verbal Learning and Memory Test                            |
| BW           | Body Weight                                                |
| CF           | Rey Complex Figure Test                                    |
| EudraCT      | European Union Drug Regulating Authorities Clinical Trials |
| FAS          | Full analysis set                                          |
| GOS          | Glasgow Outcome Scale                                      |
| HADS         | Hospital Anxiety and Depression Scale                      |
| HLT          | High Level Term                                            |
| ITT          | Intention to treat                                         |
| LOCF         | Last Observation Carried Forward                           |
| mRS          | Modified Rankin Scale                                      |
| MedDRA       | Medical Dictionary for Regulatory Activities               |
| PP           | Per protocol                                               |
| SAE          | Serious Adverse Event                                      |
| SAP          | Statistical Analysis Plan                                  |
| SD           | Standard deviation                                         |
| SOP          | Standard Operating Procedure                               |
| SOC          | System Organ Class                                         |
| SUSAR        | Suspected unexpected serious adverse reaction              |
| TMT          | Trail Making Test                                          |

## 1.1 Tables

|                                                                                        |    |
|----------------------------------------------------------------------------------------|----|
| Table 10.2.1: Listing of patients violating inclusion/exclusion criteria .....         | 16 |
| Table 10.3.1: Demographics (FAS).....                                                  | 17 |
| Table 10.3.2: Educational status (FAS) .....                                           | 17 |
| Table 10.3.3: Vital signs (FAS) .....                                                  | 18 |
| Table 10.3.4: Physical examination (FAS).....                                          | 19 |
| Table 10.3.5: Diagnosis (FAS) .....                                                    | 20 |
| Table 10.3.6: Seizures (FAS) .....                                                     | 20 |
| Table 10.3.7: Listing of seizures (FAS) .....                                          | 21 |
| Table 10.3.8: Glasgow Coma Scale on admission (FAS) .....                              | 22 |
| Table 10.3.9: Glasgow Coma Scale - pre-randomization (FAS) .....                       | 23 |
| Table 10.3.10: Pre-encephalitis Barthel index (FAS) .....                              | 24 |
| Table 10.3.11: Pre-encephalitis mRS (FAS).....                                         | 25 |
| Table 10.3.12: NIH scale day 0 (FAS) .....                                             | 25 |
| Table 10.3.13: Mini-Mental test day 0 (FAS).....                                       | 27 |
| Table 10.3.14: Demographics (PP set).....                                              | 28 |
| Table 10.3.15: Educational status (PP set) .....                                       | 28 |
| Table 10.3.16: Vital signs (PP set).....                                               | 29 |
| Table 10.3.17: Physical examination (PP set).....                                      | 30 |
| Table 10.3.18: Diagnosis (PP set) .....                                                | 31 |
| Table 10.3.19: Seizures (PP set) .....                                                 | 31 |
| Table 10.3.20: Listing of seizures (PP set) .....                                      | 31 |
| Table 10.3.21: Glasgow Coma Scale on admission (PP set) .....                          | 32 |
| Table 10.3.22: Glasgow Coma Scale - pre-randomization (PP set) .....                   | 33 |
| Table 10.3.23: Pre-encephalitis Barthel index (PP set) .....                           | 34 |
| Table 10.3.24: Pre-encephalitis mRS (PP set).....                                      | 34 |
| Table 10.3.25: NIH scale day 0 (PP set) .....                                          | 35 |
| Table 10.3.26: Mini-Mental test day 0 (PP set).....                                    | 37 |
| Table 10.4.1: Binary mRS at scheduled month 6 visit – LOCF (FAS).....                  | 38 |
| Table 10.4.2: Binary mRS at scheduled month 6 visit – best case imputation (FAS) ..... | 38 |
| Table 10.4.3: Binary mRS at scheduled month 6 visit – worst case imputation (FAS)..... | 38 |
| Table 10.4.4: Binary mRS at month 6 (PP set).....                                      | 39 |
| Table 10.4.5: Binary mRS at month 6 +- 14 days – LOCF imputation (FAS) .....           | 39 |
| Table 10.5.1: Mortality at month 6 (Chi <sup>2</sup> -test) (FAS).....                 | 40 |
| Table 10.5.2: Mortality at month 12 (Chi <sup>2</sup> -test) (FAS).....                | 40 |
| Table 10.5.3: Mortality at month 6 (Chi <sup>2</sup> -test) (PP set).....              | 41 |
| Table 10.5.4: Mortality at month 12 (Chi <sup>2</sup> -test) (PP set).....             | 41 |
| Table 10.5.5: Glasgow outcome scale (FAS).....                                         | 42 |
| Table 10.5.6: Glasgow outcome scale (PP set).....                                      | 42 |
| Table 10.5.7: EQ-5D month 6 (FAS).....                                                 | 43 |
| Table 10.5.8: EQ-5D month 12 (FAS).....                                                | 44 |
| Table 10.5.9: EQ-5D month 6 (PP set).....                                              | 45 |

|                                                                                       |    |
|---------------------------------------------------------------------------------------|----|
| Table 10.5.10: EQ-5D month 12 (PP set).....                                           | 46 |
| Table 10.5.11: mRS at scheduled visit times (FAS).....                                | 47 |
| Table 10.5.12: Binary mRS at scheduled visit month 12 (FAS).....                      | 47 |
| Table 10.5.13: mRS at scheduled visit times (PP set).....                             | 49 |
| Table 10.5.14: Binary mRS at scheduled visit times (PP set).....                      | 49 |
| Table 10.5.15: Available reasons for missing neuropsychological testing.....          | 51 |
| Table 10.5.16: Mini-Mental test (FAS).....                                            | 52 |
| Table 10.5.17: Complex Figure (FAS).....                                              | 53 |
| Table 10.5.18: Auditory Verbal Learning Test (FAS).....                               | 54 |
| Table 10.5.19: Digit Span (FAS).....                                                  | 55 |
| Table 10.5.20: Trail Making Test (FAS).....                                           | 56 |
| Table 10.5.21: Word Fluency (FAS).....                                                | 56 |
| Table 10.5.22: Hospital Anxiety and Depression Scale HADS-D (FAS).....                | 57 |
| Table 10.5.23: Categorized Hospital Anxiety and Depression Scale HADS-D (FAS).....    | 57 |
| Table 10.5.24: Mini-Mental test (PP set).....                                         | 58 |
| Table 10.5.25: Complex Figure (PP set).....                                           | 59 |
| Table 10.5.26: Auditory Verbal Learning Test (PP set).....                            | 60 |
| Table 10.5.27: Digit Span (PP set).....                                               | 61 |
| Table 10.5.28: Trail Making test (PP set).....                                        | 62 |
| Table 10.5.29: Word Fluency (PP set).....                                             | 62 |
| Table 10.5.30: Hospital Anxiety and Depression Scale HADS-D (PP set).....             | 63 |
| Table 10.5.31: Categorized Hospital Anxiety and Depression Scale HADS-D (PP set)..... | 63 |
| Table 10.5.32: Barthel index total (FAS).....                                         | 64 |
| Table 10.5.33: Barthel index items at discharge/day 30 (FAS).....                     | 65 |
| Table 10.5.34: Barthel index items at month 6 (FAS).....                              | 66 |
| Table 10.5.35: Barthel index items at month 12 (FAS).....                             | 68 |
| Table 10.5.36: Barthel index total (PP set).....                                      | 69 |
| Table 10.5.37: Barthel index items at discharge/day 30 (PP set).....                  | 70 |
| Table 10.5.38: Barthel index items at month 6 (PP set).....                           | 71 |
| Table 10.5.39: Barthel index items at month 12 (PP set).....                          | 73 |
| Table 10.5.40: NIH total scores (FAS).....                                            | 74 |
| Table 10.5.41: NIH scale single items day 7 (FAS).....                                | 75 |
| Table 10.5.42: NIH scale single items at discharge/day 30 (FAS).....                  | 77 |
| Table 10.5.43: NIH scale single items at month 6 (FAS).....                           | 79 |
| Table 10.5.44: NIH scale single items at month 12 (FAS).....                          | 81 |
| Table 10.5.45: NIH total scores (PP set).....                                         | 83 |
| Table 10.5.46: NIH scale single items day 7 (PP set).....                             | 84 |
| Table 10.5.47: NIH scale single items at discharge/day 30 (PP set).....               | 86 |
| Table 10.5.48: NIH scale single items at month 6 (PP set).....                        | 88 |
| Table 10.5.49: NIH scale single items at month 12 (PP set).....                       | 90 |
| Table 10.6.1: Vital signs day 7 (FAS).....                                            | 92 |
| Table 10.6.2: Vital signs at discharge/day 30 (FAS).....                              | 93 |
| Table 10.6.3: Vital signs month 6 (FAS).....                                          | 94 |

|                                                                                                           |     |
|-----------------------------------------------------------------------------------------------------------|-----|
| Table 10.6.4: Vital signs month 12 (FAS).....                                                             | 95  |
| Table 10.6.5: Physical examination day 7 (FAS) .....                                                      | 96  |
| Table 10.6.6: Physical examination discharge/day 30 (FAS) .....                                           | 97  |
| Table 10.6.7: Physical examination month 6 (FAS) .....                                                    | 98  |
| Table 10.6.8: Physical examination month 12 (FAS) .....                                                   | 99  |
| Table 10.6.9: Patients with (serious) adverse events.....                                                 | 100 |
| Table 10.6.10: Characteristics of serious adverse events .....                                            | 100 |
| Table 10.6.11: Characteristics of adverse events.....                                                     | 101 |
| Table 10.6.12: System Organ Class (SOC) according to severity - group: Placebo.....                       | 102 |
| Table 10.6.13: System Organ Class (SOC) according to severity - group: Dexamethasone .....                | 103 |
| Table 10.6.14: SOC/PT according to severity - group: Placebo.....                                         | 104 |
| Table 10.6.15: SOC/PT according to severity - group: Dexamethasone .....                                  | 107 |
| Table 10.6.16: System Organ Class (SOC) according to causality to study drug - group: Placebo.....        | 109 |
| Table 10.6.17: System Organ Class (SOC) according to causality to study drug - group: Dexamethasone ..... | 110 |
| Table 10.6.18: SOC / PT according to causality to study drug - group: Placebo .....                       | 111 |
| Table 10.6.19: SOC / PT according to causality to study drug - group: Dexamethasone.....                  | 114 |
| Table 10.6.20: System Organ Class (SOC) according to outcome - group: Placebo.....                        | 117 |
| Table 10.6.21: System Organ Class (SOC) according to outcome - group: Dexamethasone .....                 | 118 |
| Table 10.6.22: SOC / PT according to outcome - group: Placebo .....                                       | 119 |
| Table 10.6.23: SOC / PT according to outcome - group: Dexamethasone.....                                  | 122 |
| Table 10.7.1: Acyclovir administration (FAS) .....                                                        | 125 |
| Table 10.7.2: Dexamethasone/Placebo administration (FAS) .....                                            | 125 |
| Table 10.7.3: Acyclovir administration (PP set).....                                                      | 126 |
| Table 10.7.4: Dexamethasone/Placebo administration (PP set).....                                          | 126 |
| Table 10.8.1: Study termination (FAS) .....                                                               | 127 |
| Table 10.9.1: Seizures since last visit (FAS) .....                                                       | 128 |
| Table 10.9.2: Seizures since last visit (PP set) .....                                                    | 128 |

## 1.2 Figures

|                                                                                                          |    |
|----------------------------------------------------------------------------------------------------------|----|
| Figure 10.5.1: Kaplan-Meier estimate for survival probability and p-value of log-rank test (FAS).....    | 40 |
| Figure 10.5.2: Kaplan-Meier estimate for survival probability and p-value of log-rank test (PP set)..... | 41 |
| Figure 10.5.3: Stacked bar plots mRS (FAS).....                                                          | 48 |
| Figure 10.5.4: Stacked bar plots mRS (PP set).....                                                       | 50 |

## 2 Objective of the trial

GACHE aims to evaluate the effect of early adjuvant corticosteroids (dexamethasone) on morbidity and mortality in the treatment of adult patients with herpes-simplex-virusencephalitis.

## 3 Study design

The study design of GACHE is that of a multicenter, randomized, double-blind, placebo-controlled, parallel group clinical trial in adult patients with herpes-simplex-virus-encephalitis. The statistical design was planned as a group-sequential design with a maximum of three stages, rejection boundaries according to O'Brien and Fleming (1979) and a potential sample size adjustment for the last stage (Müller and Schäfer, 2001).

Due to slow recruitment, the study was terminated before the first interim analysis. The final analysis is conducted as done according to a fixed sample size design.

## 4 Treatment

Experimental group ('Dexamethasone'):

10 mg/kg BW acyclovir (i.v., 1 hour infusion) every 8 hours for 14 days (dosage adaptation in case of decreased creatinine clearance) + dexamethasone 40 mg intravenously every 24 hours for 4 days

Control group ('Placebo'):

10 mg/kg BW acyclovir (i.v., 1 hour infusion) every 8 hours for 14 days (dosage adaptation in case of decreased creatinine clearance) + Placebo every 24 hours for 4 days

## 5 Aims of the trial

### Primary endpoint

The primary endpoint is the binary functional outcome 6 months after randomization (measured by the modified Rankin scale (mRS), a seven-point-scale 0-6). An mRS of 3 to 6 is seen as an unfavourable outcome (=failure). Patients who died between randomization and 6 months follow-up are evaluated with mRS=6. The mRS score at 6 months is derived based on the "Structured Interview for the Modified Rankin Scale" (Wilson, 2002).

### Secondary endpoints

1. Mortality at 6 months after randomization.
2. Mortality at 12 months after randomization.
3. Functional outcome (Glasgow outcome scale: GOS) and quality of life (EuroQol 5D) 6 months after randomization.
4. Functional outcome (mRS: based on the "Structured Interview for the Modified Rankin Scale", GOS) and quality of life (EuroQol 5D) 12 months after randomization.
5. Neuropsychological testing 6 months after randomization (defined in more detail later).
6. Barthel Index at discharge (at latest day 30), at 6 months visit and 12 months visit
7. NIH-scale at day 7, at discharge (at latest day 30), at 6 months visit and 12 months visit

## 6 Analysis sets

The full analysis set (FAS) based on the intention to treat principle (ITT) is the primary analysis set. It comprises all patients treated with at least one dose of study medication (acyclovir and dexamethasone/placebo) and analyzed in the group randomized to. A secondary analysis is performed as a repetition of the primary analysis using all patients who were treated and observed as outlined in the protocol. Patients are included into this per protocol (PP) analysis only if all inclusion and exclusion criteria are fulfilled and all medical procedures/visits have been carried out according to the protocol (dexamethasone/placebo over 4 days, if not dead: 6-month visit within  $\pm 14$  days). In case of randomization through randomization list without entering into the randomization tool afterwards, the patient is excluded from the PP set. The affiliation to the PP set in disputable cases was fixed in the document 'Unresolved Data Issues' prior to database closure (see section 'Unresolved data issues' there). The safety analysis set contains all patients who were treated at least for one day (acyclovir dexamethasone/placebo) and patients are categorized into groups as treated.

## 7 Data handling

Due to slow recruitment, the study was terminated after 55 months of recruitment. In this time, 42 randomizations have been carried out. One patient was randomized but PCR result for HSV encephalitis was negative. No data were documented for this patient. For one further patient, randomization was not performed via the randomization tool but next blinded study medication was given. This is in accordance to the procedure defined in the study protocol. However, the randomization entry created afterwards for this patient was incorrect. Therefore, this entry was deleted and a correct entry was created. For a further patient, the treatment code he was randomized to was expired and a new entry was necessary. In all, this resulted in 39 randomized patients. One further patient had been included into the study without randomization and without entering into the randomization tool afterwards. One patient was randomized into the study without legally valid written informed consent. After formal instruction, the data for this patient were deleted and CRFs were destroyed.

For reporting of SUSARs, the blind has been broken in two cases for managing the safety data. The blinding was maintained for the clinical study personal. One further case of unblinding was reported in the CRF (reason not given).

### Missing values

For the ITT analysis set, missing values for the primary endpoint were imputed using the last-observation-carried-forward approach (LOCF). Patients who died between randomization and the 6 months visit were evaluated with mRS=6 at the 6 months visit. Patients who died between randomization and the 12 months visit were evaluated with mRS=6 at the 12 months visit. Imputation strategy for the Hospital Anxiety and Depression Scale (HADS) is described below. For further secondary endpoints no imputation was done. For the PP set no missing values were imputed.

## 8 Handling of unresolved data issues

The handling of remaining unresolved implausible values was fixed in the document 'Unresolved Data Issues' prior to database closure (see section 'Unresolved data issues' there). The unresolved data issues



are handled as described in this document. The mRS of patient 12-033 at visit 5 is set to 0 instead of 1 as stated in this document. This correction was made due to a typographic error in the document 'Unresolved data issues' and corresponds to the intention of the document.

For patient 07-102, no date of last contact was available. In this case, the date of last documented visit (visit 3) was used as date of last contact/last day in study.

## 9 Statistical methods

### 9.1 Demographics and baseline characteristics

Both treatment groups were characterized using descriptive methods based on the FAS and PP set. A flowchart is given to illustrate patient numbers included in the different analysis sets. Deviations from the inclusion and exclusion criteria were listed individually.

### 9.2 Primary endpoint

The primary endpoint analysis was based on the FAS and follows the intention-to-treat principle. The null hypothesis of equal failure rates  $p_{\text{control}}$  (acyclovir monotherapy group) and  $p_{\text{exp}}$  (group of acyclovir and corticosteroids) after 6 months was tested by a (two-sided) Chi<sup>2</sup>-test assessing the following test problem:

$$H_0: p_{\text{control}} = p_{\text{exp}} \quad \text{vs.} \quad H_1: p_{\text{control}} \neq p_{\text{exp}}$$

The two-sided significance level is set to  $\alpha=0.05$ .

In the Placebo group missing information on the primary endpoint was present in 2 patients and in the Dexamethason group in 5 patients. For primary analysis these values were imputed according to the last-observation-carried-forward approach (LOCF) (see section 7 Data handling).

In case of a significant result in the above described analysis, it was pre-planned to test the same null-hypothesis of equal rates for the first secondary endpoint (mortality after 6 months), applying the same significance level. Again, if this hypothesis can be rejected, the same null hypothesis should be tested for the second secondary endpoint (mortality after 12 months). Due to the a priori ordering of the three hypotheses, this strategy allows confirmatory conclusions for all tests without increase of the overall type I error rate. Since no significant difference for the primary endpoint could be shown, there was in fact no further testing performed.

#### 9.2.1 Interim analysis

Due to unplanned termination of the study, no interim analysis was conducted. This final analysis was performed according to a fixed sample size design.

#### 9.2.2 Sensitivity analyses for the primary endpoint

As sensitivity analysis, the primary endpoint was analyzed additionally based on the PP set in the same manner.

In addition, worst case and best case scenarios were evaluated based on the FAS meaning that in both treatment groups the worst (mRS>2) or best (mRS≤2) outcome was assumed in case of missing values.

Due to the small number of randomized patients and the partly high amount of missing data (e.g. for Glasgow Coma Scale at baseline) no further analyses like regression analyses were conducted.

### 9.3 Secondary endpoints

All secondary endpoints were analyzed based on the FAS and the PP set. In case of categorical variables, p-values correspond to the Chi<sup>2</sup>-test, in case of continuous variables, p-values are given for the non-parametric U-test.

#### **Mortality**

Mortality rates at 6 and 12 months are tabulated by treatment group. Corresponding p-values are provided for the Chi<sup>2</sup>-test. Additionally, Kaplan-Meier-curves by treatment group were used to graphically evaluate the survival rates over time together with results from the log rank tests.

#### **Functional outcome and quality of life**

Functional outcome (mRS, GOS) and quality of life (EuroQol 5D) were analyzed 6 months and 12 months after randomization, respectively.

The Glasgow outcome scale (five-point scale) and the mRS (seven-point scale) are tabulated by treatment group and time point. Corresponding p-values are given for the non-parametric U-test. For mRS, relative frequencies are depicted in stacked bar graphs.

Additionally, mRS after 12 months was dichotomized in the same manner as the primary outcome and tabulated by treatment group. The corresponding p-values are given for the Chi<sup>2</sup>-test.

EuroQol 5D overall is tabulated by treatment group and time point. Corresponding p-values are given for the non-parametric U-test.

Each of the five items of the EuroQol 5D is tabulated by treatment group and time point. Corresponding p-values are given for the non-parametric U-test.

#### **Neuropsychological testing**

All causes given in case of non-conducted neuropsychological testing are listed by test.

AVLT I and II (Verbal Learning and Memory Test): The sum of Dg 1-5, Dg 6 and Dg 7 are tabulated by treatment. Corresponding p-values are given for the non-parametric U-test.

CF (Rey Complex Figure Test): The Rey Complex Figure Tests were rated centrally by Dr. phil. Klaus Hess, Department of Neurology at the University Hospital Heidelberg. The score observed at each time point (copy, immediate recall, delayed recall) and the sum of first and second time point (copy, immediate recall) is tabulated by treatment group. If the second time point is missing, the score observed at the first time point corresponds to the sum of first and second time point. The corresponding p-value is given for the non-parametric U-test.

Digit Test: DS-f Gesamt, DS-b Gesamt, DS-f Spanne and DS-b Spanne are tabulated by treatment group. Corresponding p-values are given for the non-parametric U-test.

TMT (Trail Making Test): The reaction time is tabulated by treatment group. The corresponding p-value is given for the non-parametric U-test.

Word fluency: The sum of produced items (animal & food together) is tabulated by treatment group. The corresponding p-value is given for the non-parametric U-test.

Mini Mental Test: The total score and the sub-categories A-E are tabulated by treatment group. Corresponding p-values are given for the non-parametric U-test.

HADS (Hospital Anxiety and Depression Scale): This questionnaire defines two subscales, the anxiety score and the depression score. Each score was calculated adding up the values given for seven items. In case of one missing value within a subscale, this value was imputed using the mean value of the six other items. If more than one item was missing within a subscale, no imputation was done. The subscales were categorized into negative (0-7), neutral (8-10) and positive ( $\geq 11$ ) and tabulated by treatment. Corresponding p-values are given for the Chi<sup>2</sup>-test.

**Barthel Index:**

The Barthel Index at discharge (at latest day 30), at 6 months visit and at 12 months visit is tabulated by treatment group and time. Corresponding p-values are given for the non-parametric U-test.

**NIH-scale:**

The NIH-scale at day 7, discharge (at latest day 30), at 6 months visit and at 12 months visit is tabulated by treatment group and time point. Corresponding p-values are given for the non-parametric U-test.

## 9.4 Safety

The main safety parameter is death which is analyzed as secondary endpoint. Additionally to that, death is analyzed in the same manner based on the safety analysis set.

Adverse events are tabulated by treatment group and overall by presenting number of events and number of subject with at least one event. Information on number of adverse events, SAEs, severity, causality and category (in summarized and detailed form) are given.

## 9.5 Differences to trial protocol specified in the SAP

In addition to the study protocol, Barthel Index and NIH-scale (neurological examination) were evaluated as secondary endpoints. The material-consuming Aachen Aphasia tests were discarded from the list of neuropsychological tests and not undertaken because the neuropsychological impairment after >4 months is well examined with the other tests. The MRI at month 6 after randomization as well as the rate of occurrence of seizures were not analyzed.

Due to the limited number of patients, no logistic regression analyses was done.

## 9.6 Analyses not prespecified, more detailed specifications and differences to the SAP

As intended by the SAP (GACHE Statistical Analysis Plan, 2014), the measured mRS was used independently of whether the actual visit was within  $\pm 14$  days around the scheduled month 6 or month 12 visit, respectively. As sensitivity analysis, the mRS is set to missing and imputed using LOCF if the actual visit is not within  $\pm 14$  days around the scheduled visit.

Baseline characteristics and demographic data (see sections 9.1 and 1.1) are additionally shown for the PP set.

Due to the low number of cell counts and therefore questionable validity of the Chi<sup>2</sup>-test, p-values for a conditional test are shown for the primary endpoint in addition to the pre-defined Chi<sup>2</sup> test.

The imputation of missing values (see section 7 in this document) was not restricted to patients that are 'lost to follow up' (as it has been stated in section 5 of the statistical analysis plan (GACHE Statistical Analysis Plan, 2014)).

The rate of seizures since last visit is shown in section 10.9 (Other analyses).

## 9.7 Interpretation of results

Due to slow recruitment, the study was terminated prematurely. With the lower sample size the planned power is not reached and all results can be interpreted only descriptively.

## 9.8 Software

All analyses have been done using validated SAS<sup>®</sup> Version 9.1 run on a Linux system. Stacked bar graphs for mRS as well as Kaplan-Meier plots have been created using SAS<sup>®</sup> Version 9.3.

## 10 Results

### 10.1 Flow chart of enrolled patients

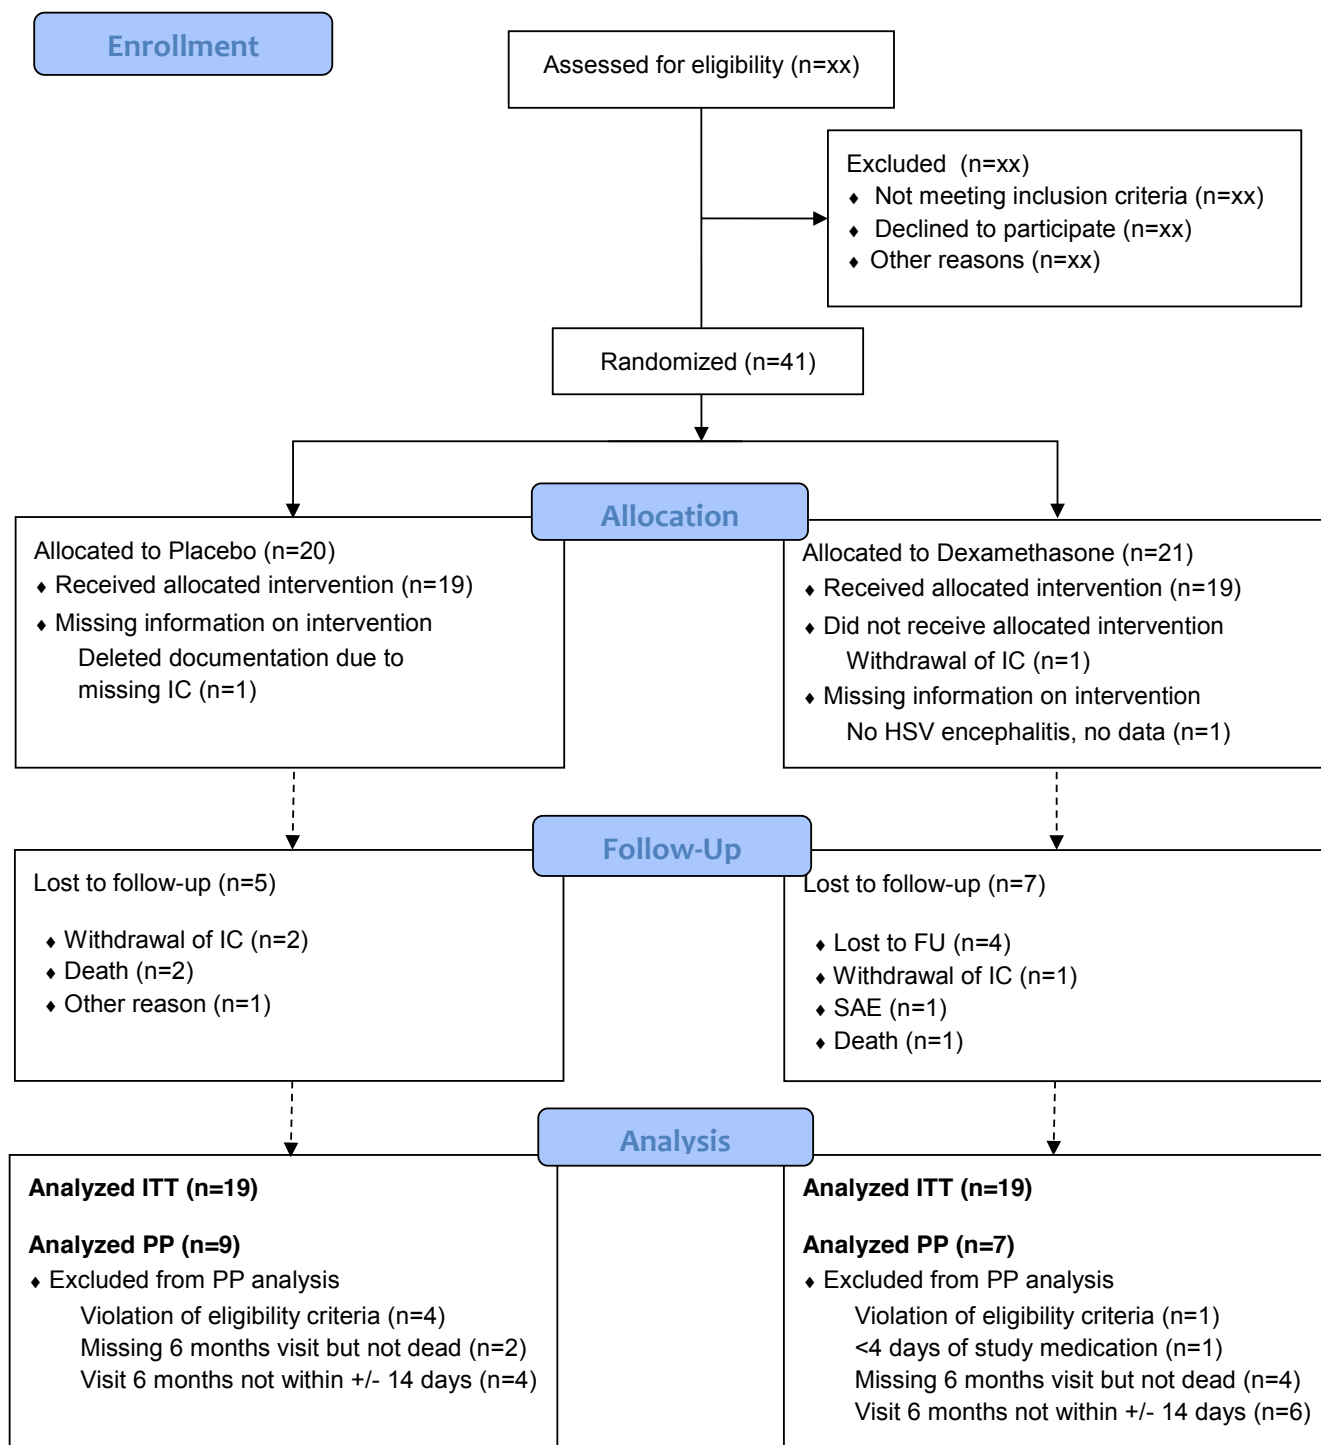

## 10.2 Inclusion/exclusion criteria

Two patients have been excluded from PP set due to documented violation of inclusion/exclusion criteria.

**Table 10.2.1: Listing of patients violating inclusion/exclusion criteria**

| Patient | Age >=18 to <=85 years                 | Laboratory-proven HSV1    | Focal neurological signs | Informed consent                      | Date of informed consent  | Negative pregnancy testing | Systemic corticosteroids                | Hyper-sensitivity                                | Two fixed dilated pupils                      | mRS/ Barthel Index | Pregnancy | No highly effective birth control method | Breast feeding women |
|---------|----------------------------------------|---------------------------|--------------------------|---------------------------------------|---------------------------|----------------------------|-----------------------------------------|--------------------------------------------------|-----------------------------------------------|--------------------|-----------|------------------------------------------|----------------------|
| 03-007  | yes                                    | yes                       | yes                      | yes                                   | 16/01/2012                | na                         | yes                                     | no                                               | no                                            | no                 | no        | no                                       | no                   |
| 16-019  | yes                                    | yes                       | yes                      | yes                                   | 09/05/2011                | yes                        | no                                      | no                                               | no                                            | no                 | no        | no                                       | no                   |
| Patient | Tuberculosis/systemic fungal infection | Head trauma/neuro-surgery | Peptic ulcer disease     | Acute viral infection other than HSV1 | Life expectancy < 3 years | Other serious illness      | Participation in another clinical trial | Previous Participation in another clinical trial | Previous Participation in this clinical trial |                    |           |                                          |                      |
| 03-007  | no                                     | no                        | no                       | no                                    | no                        | no                         | no                                      | no                                               | no                                            |                    |           |                                          |                      |
| 16-019  | no                                     | no                        | no                       | no                                    | no                        | no                         | yes                                     | no                                               | no                                            |                    |           |                                          |                      |

In addition, 6 patients have contradictory documentations regarding inclusion/exclusion criteria as discussed in the document 'Unresolved Data Issues' (see section 'Unresolved data issues'). 3 of these 6 patients have been excluded from PP set due to the contradictory documentation, and the other 3 patients have already been excluded for other reasons.

## 10.3 Demographics and baseline characteristics

### 10.3.1 Full analysis set

**Table 10.3.1: Demographics (FAS)**

|               | Placebo<br>N=19 | Dexamethasone<br>N=19 | Total<br>N=38 |
|---------------|-----------------|-----------------------|---------------|
| Gender        |                 |                       |               |
| - male        | 10 ( 52.6%)     | 11 ( 57.9%)           | 21 ( 55.3%)   |
| - female      | 9 ( 47.4%)      | 8 ( 42.1%)            | 17 ( 44.7%)   |
| Age           |                 |                       |               |
| - N           | 19              | 19                    | 38            |
| - Mean +/- SD | 58.6 +/-15.0    | 61.6 +/-12.1          | 60.1 +/-13.6  |
| - Median      | 61.0            | 65.0                  | 62.0          |
| - p25, p75    | 43.0, 70.0      | 52.0, 72.0            | 49.0, 72.0    |
| - Min, Max    | 37.0, 85.0      | 38.0, 77.0            | 37.0, 85.0    |
| - Missing     | 0               | 0                     | 0             |

**Table 10.3.2: Educational status (FAS)**

|                                                                                  | Placebo<br>N=19 | Dexamethasone<br>N=19 | Total<br>N=38 |
|----------------------------------------------------------------------------------|-----------------|-----------------------|---------------|
| Höchster allgemeinbildender Schulabschluss                                       |                 |                       |               |
| - Hauptschulabschluss                                                            | 6 ( 46.2%)      | 8 ( 61.5%)            | 14 ( 53.8%)   |
| - Realschulabschluss                                                             | 3 ( 23.1%)      | 2 ( 15.4%)            | 5 ( 19.2%)    |
| - Polytechnische Oberschule 10. Klasse                                           | 2 ( 15.4%)      | 0 ( 0.0%)             | 2 ( 7.7%)     |
| - Abitur                                                                         | 1 ( 7.7%)       | 3 ( 23.1%)            | 4 ( 15.4%)    |
| - Anderer Schulabschluss                                                         | 1 ( 7.7%)       | 0 ( 0.0%)             | 1 ( 3.8%)     |
| - Missing                                                                        | 6               | 6                     | 12            |
| Beruflicher Ausbildungsabschluss                                                 |                 |                       |               |
| - Keinen berufl. Abschluss, nicht in Ausbildung                                  | 2 ( 15.4%)      | 0 ( 0.0%)             | 2 ( 7.7%)     |
| - Lehre abgeschlossen                                                            | 5 ( 38.5%)      | 6 ( 46.2%)            | 11 ( 42.3%)   |
| - Berufsfachschule, Handelsschule abgeschlossen                                  | 3 ( 23.1%)      | 2 ( 15.4%)            | 5 ( 19.2%)    |
| - Fachschule, Meister-, Technikerschule, Berufs- oder Fachakademie abgeschlossen | 3 ( 23.1%)      | 1 ( 7.7%)             | 4 ( 15.4%)    |
| - Hochschulabschluss                                                             | 0 ( 0.0%)       | 4 ( 30.8%)            | 4 ( 15.4%)    |
| - Missing                                                                        | 6               | 6                     | 12            |

**Table 10.3.3: Vital signs (FAS)**

|                                        | <b>Placebo<br/>N=19</b> | <b>Dexamethasone<br/>N=19</b> | <b>Total<br/>N=38</b> |
|----------------------------------------|-------------------------|-------------------------------|-----------------------|
| <b>Weight (kg)</b>                     |                         |                               |                       |
| - N                                    | 16                      | 17                            | 33                    |
| - Mean +/- SD                          | 78.3 +/-12.0            | 83.4 +/-18.5                  | 80.9 +/-15.6          |
| - Median                               | 78.5                    | 80.0                          | 80.0                  |
| - p25, p75                             | 71.8, 84.0              | 70.0, 84.0                    | 70.0, 84.0            |
| - Min, Max                             | 56.5, 100.0             | 65.0, 126.0                   | 56.5, 126.0           |
| - Missing                              | 3                       | 2                             | 5                     |
| <b>BMI</b>                             |                         |                               |                       |
| - N                                    | 14                      | 16                            | 30                    |
| - Mean +/- SD                          | 25.9 +/-3.9             | 26.9 +/-3.5                   | 26.5 +/-3.7           |
| - Median                               | 26.2                    | 27.0                          | 26.6                  |
| - p25, p75                             | 21.9, 29.4              | 24.6, 29.0                    | 24.2, 29.4            |
| - Min, Max                             | 19.1, 30.9              | 20.6, 33.2                    | 19.1, 33.2            |
| - Missing                              | 5                       | 3                             | 8                     |
| <b>Temperature (°C)</b>                |                         |                               |                       |
| - N                                    | 19                      | 18                            | 37                    |
| - Mean +/- SD                          | 38.2 +/-0.8             | 37.7 +/-0.9                   | 38.0 +/-0.9           |
| - Median                               | 38.3                    | 37.4                          | 38.0                  |
| - p25, p75                             | 37.6, 38.6              | 36.9, 38.7                    | 37.4, 38.6            |
| - Min, Max                             | 36.6, 40.0              | 36.5, 39.4                    | 36.5, 40.0            |
| - Missing                              | 0                       | 1                             | 1                     |
| <b>Heart rate (bpm)</b>                |                         |                               |                       |
| - N                                    | 18                      | 18                            | 36                    |
| - Mean +/- SD                          | 85.9 +/-18.8            | 84.2 +/-18.9                  | 85.1 +/-18.6          |
| - Median                               | 87.0                    | 81.0                          | 83.0                  |
| - p25, p75                             | 74.0, 92.0              | 72.0, 90.0                    | 72.0, 91.0            |
| - Min, Max                             | 59.0, 130.0             | 48.0, 126.0                   | 48.0, 130.0           |
| - Missing                              | 1                       | 1                             | 2                     |
| <b>Systolic blood pressure (mmHg)</b>  |                         |                               |                       |
| - N                                    | 19                      | 18                            | 37                    |
| - Mean +/- SD                          | 133.4 +/-16.3           | 131.6 +/-18.6                 | 132.5 +/-17.3         |
| - Median                               | 131.0                   | 125.0                         | 130.0                 |
| - p25, p75                             | 120.0, 140.0            | 120.0, 150.0                  | 120.0, 145.0          |
| - Min, Max                             | 105.0, 180.0            | 100.0, 164.0                  | 100.0, 180.0          |
| - Missing                              | 0                       | 1                             | 1                     |
| <b>Diastolic blood pressure (mmHg)</b> |                         |                               |                       |
| - N                                    | 19                      | 18                            | 37                    |
| - Mean +/- SD                          | 74.4 +/-11.9            | 73.4 +/-10.1                  | 73.9 +/-10.9          |
| - Median                               | 75.0                    | 74.0                          | 75.0                  |
| - p25, p75                             | 65.0, 80.0              | 60.0, 80.0                    | 65.0, 80.0            |
| - Min, Max                             | 53.0, 100.0             | 60.0, 89.0                    | 53.0, 100.0           |
| - Missing                              | 0                       | 1                             | 1                     |



**Table 10.3.4: Physical examination (FAS)**

|                                 | <b>Placebo<br/>N=19</b> | <b>Dexamethasone<br/>N=19</b> | <b>Total<br/>N=38</b> |
|---------------------------------|-------------------------|-------------------------------|-----------------------|
| <b>General appearance</b>       |                         |                               |                       |
| - normal                        | 18 ( 94.7%)             | 12 ( 63.2%)                   | 30 ( 78.9%)           |
| - abnormal                      | 1 ( 5.3%)               | 7 ( 36.8%)                    | 8 ( 21.1%)            |
| <b>Head &amp; Neck</b>          |                         |                               |                       |
| - normal                        | 18 ( 94.7%)             | 16 ( 84.2%)                   | 34 ( 89.5%)           |
| - abnormal                      | 1 ( 5.3%)               | 2 ( 10.5%)                    | 3 ( 7.9%)             |
| - not done                      | 0 ( 0.0%)               | 1 ( 5.3%)                     | 1 ( 2.6%)             |
| <b>Eyes &amp; Ears</b>          |                         |                               |                       |
| - normal                        | 19 (100.0%)             | 14 ( 73.7%)                   | 33 ( 86.8%)           |
| - abnormal                      | 0 ( 0.0%)               | 4 ( 21.1%)                    | 4 ( 10.5%)            |
| - not done                      | 0 ( 0.0%)               | 1 ( 5.3%)                     | 1 ( 2.6%)             |
| <b>Nose &amp; Throat</b>        |                         |                               |                       |
| - normal                        | 19 (100.0%)             | 17 ( 89.5%)                   | 36 ( 94.7%)           |
| - not done                      | 0 ( 0.0%)               | 2 ( 10.5%)                    | 2 ( 5.3%)             |
| <b>Chest</b>                    |                         |                               |                       |
| - normal                        | 16 ( 84.2%)             | 17 ( 89.5%)                   | 33 ( 86.8%)           |
| - abnormal                      | 2 ( 10.5%)              | 1 ( 5.3%)                     | 3 ( 7.9%)             |
| - not done                      | 1 ( 5.3%)               | 1 ( 5.3%)                     | 2 ( 5.3%)             |
| <b>Lungs</b>                    |                         |                               |                       |
| - normal                        | 17 ( 89.5%)             | 18 ( 94.7%)                   | 35 ( 92.1%)           |
| - abnormal                      | 2 ( 10.5%)              | 0 ( 0.0%)                     | 2 ( 5.3%)             |
| - not done                      | 0 ( 0.0%)               | 1 ( 5.3%)                     | 1 ( 2.6%)             |
| <b>Heart</b>                    |                         |                               |                       |
| - normal                        | 16 ( 84.2%)             | 17 ( 89.5%)                   | 33 ( 86.8%)           |
| - abnormal                      | 3 ( 15.8%)              | 1 ( 5.3%)                     | 4 ( 10.5%)            |
| - not done                      | 0 ( 0.0%)               | 1 ( 5.3%)                     | 1 ( 2.6%)             |
| <b>Abdomen</b>                  |                         |                               |                       |
| - normal                        | 19 (100.0%)             | 17 ( 89.5%)                   | 36 ( 94.7%)           |
| - abnormal                      | 0 ( 0.0%)               | 1 ( 5.3%)                     | 1 ( 2.6%)             |
| - not done                      | 0 ( 0.0%)               | 1 ( 5.3%)                     | 1 ( 2.6%)             |
| <b>Extremities &amp; Joints</b> |                         |                               |                       |
| - normal                        | 18 ( 94.7%)             | 17 ( 89.5%)                   | 35 ( 92.1%)           |
| - abnormal                      | 1 ( 5.3%)               | 1 ( 5.3%)                     | 2 ( 5.3%)             |
| - not done                      | 0 ( 0.0%)               | 1 ( 5.3%)                     | 1 ( 2.6%)             |
| <b>Lymph Nodes</b>              |                         |                               |                       |
| - normal                        | 18 ( 94.7%)             | 18 ( 94.7%)                   | 36 ( 94.7%)           |
| - not done                      | 1 ( 5.3%)               | 1 ( 5.3%)                     | 2 ( 5.3%)             |
| <b>Skin</b>                     |                         |                               |                       |
| - normal                        | 16 ( 84.2%)             | 14 ( 73.7%)                   | 30 ( 78.9%)           |
| - abnormal                      | 3 ( 15.8%)              | 4 ( 21.1%)                    | 7 ( 18.4%)            |
| - not done                      | 0 ( 0.0%)               | 1 ( 5.3%)                     | 1 ( 2.6%)             |

**Table 10.3.5: Diagnosis (FAS)**

|                                           | <b>Placebo<br/>N=19</b> | <b>Dexamethasone<br/>N=19</b> | <b>Total<br/>N=38</b> |
|-------------------------------------------|-------------------------|-------------------------------|-----------------------|
| Focal neurological signs                  |                         |                               |                       |
| - no                                      | 7 ( 36.8%)              | 4 ( 21.1%)                    | 11 ( 28.9%)           |
| - yes                                     | 12 ( 63.2%)             | 15 ( 78.9%)                   | 27 ( 71.1%)           |
| Result of polymerase chain reaction assay |                         |                               |                       |
| - positive                                | 19 (100.0%)             | 19 (100.0%)                   | 38 (100.0%)           |
| Seizures within the last five days        |                         |                               |                       |
| - no                                      | 8 ( 42.1%)              | 6 ( 31.6%)                    | 14 ( 36.8%)           |
| - yes                                     | 11 ( 57.9%)             | 11 ( 57.9%)                   | 22 ( 57.9%)           |
| - unknown                                 | 0 ( 0.0%)               | 2 ( 10.5%)                    | 2 ( 5.3%)             |

**Table 10.3.6: Seizures (FAS)**

|                              | <b>Placebo<br/>N=19</b> | <b>Dexamethasone<br/>N=19</b> | <b>Total<br/>N=38</b> |
|------------------------------|-------------------------|-------------------------------|-----------------------|
| Focal continuously           |                         |                               |                       |
| - no                         | 10 ( 90.9%)             | 11 (100.0%)                   | 21 ( 95.5%)           |
| - yes                        | 1 ( 9.1%)               | 0 ( 0.0%)                     | 1 ( 4.5%)             |
| Focal non continuously       |                         |                               |                       |
| - no                         | 10 ( 90.9%)             | 8 ( 72.7%)                    | 18 ( 81.8%)           |
| - yes                        | 1 ( 9.1%)               | 3 ( 27.3%)                    | 4 ( 18.2%)            |
| Generalized continuously     |                         |                               |                       |
| - no                         | 10 ( 90.9%)             | 9 ( 81.8%)                    | 19 ( 86.4%)           |
| - yes                        | 1 ( 9.1%)               | 2 ( 18.2%)                    | 3 ( 13.6%)            |
| Generalized non continuously |                         |                               |                       |
| - no                         | 2 ( 18.2%)              | 4 ( 36.4%)                    | 6 ( 27.3%)            |
| - yes                        | 9 ( 81.8%)              | 7 ( 63.6%)                    | 16 ( 72.7%)           |

**Table 10.3.7: Listing of seizures (FAS)**

| group         | focal        |        | focal non    |        | generalized  |        | generalized non |        |
|---------------|--------------|--------|--------------|--------|--------------|--------|-----------------|--------|
|               | continuously | amount | continuously | amount | continuously | amount | continuously    | amount |
| Dexamethasone | no           | .      | no           | .      | no           | .      | yes             | K      |
| Dexamethasone | no           | .      | no           | .      | yes          | 1      | no              | .      |
| Placebo       | no           | .      | yes          | K      | no           | .      | yes             | K      |
| Placebo       | no           | .      | no           | .      | no           | .      | yes             | 1      |
| Dexamethasone | no           | .      | yes          | 2      | no           | .      | no              | .      |
| Dexamethasone | no           | .      | no           | .      | no           | .      | yes             | 1      |
| Dexamethasone | no           | .      | no           | .      | no           | .      | yes             | 1      |
| Placebo       | no           | .      | no           | .      | no           | .      | yes             | K      |
| Dexamethasone | no           | .      | no           | .      | yes          | 1      | yes             | 1      |
| Dexamethasone | no           | .      | yes          | 1      | no           | .      | no              | .      |
| Placebo       | no           | .      | no           | .      | no           | .      | yes             | 1      |
| Placebo       | no           | .      | no           | .      | no           | .      | yes             | 1      |
| Dexamethasone | no           | .      | no           | .      | no           | .      | yes             | 1      |
| Dexamethasone | no           | .      | no           | .      | no           | .      | yes             | 1      |
| Placebo       | no           | .      | no           | .      | no           | .      | yes             | 2      |
| Placebo       | no           | .      | no           | .      | no           | .      | yes             | 1      |
| Dexamethasone | no           | .      | no           | .      | no           | .      | yes             | 1      |
| Placebo       | yes          | A      | no           | .      | no           | .      | no              | .      |
| Placebo       | no           | .      | no           | .      | yes          | 1      | no              | .      |
| Placebo       | no           | .      | no           | .      | no           | .      | yes             | 3      |
| Placebo       | no           | .      | no           | .      | no           | .      | yes             | 2      |
| Dexamethasone | no           | .      | yes          | 1      | no           | .      | no              | .      |

**Table 10.3.8: Glasgow Coma Scale on admission (FAS)**

|                                 | <b>Placebo<br/>N=19</b> | <b>Dexamethasone<br/>N=19</b> | <b>Total<br/>N=38</b> |
|---------------------------------|-------------------------|-------------------------------|-----------------------|
| Glasgow Coma Scale on admission |                         |                               |                       |
| - not done                      | 3 ( 15.8%)              | 7 ( 36.8%)                    | 10 ( 26.3%)           |
| - done                          | 16 ( 84.2%)             | 12 ( 63.2%)                   | 28 ( 73.7%)           |
| Eye opening                     |                         |                               |                       |
| - 1-None                        | 2 ( 12.5%)              | 0 ( 0.0%)                     | 2 ( 7.4%)             |
| - 3-To speech                   | 5 ( 31.3%)              | 3 ( 27.3%)                    | 8 ( 29.6%)            |
| - 4-Spontaneous                 | 9 ( 56.3%)              | 8 ( 72.7%)                    | 17 ( 63.0%)           |
| - Missing                       | 3                       | 8                             | 11                    |
| Motor response                  |                         |                               |                       |
| - 1-None                        | 2 ( 12.5%)              | 0 ( 0.0%)                     | 2 ( 7.4%)             |
| - 4-Withdrawal                  | 1 ( 6.3%)               | 0 ( 0.0%)                     | 1 ( 3.7%)             |
| - 5-Localizes pain              | 3 ( 18.8%)              | 1 ( 9.1%)                     | 4 ( 14.8%)            |
| - 6-Obeys commands              | 10 ( 62.5%)             | 10 ( 90.9%)                   | 20 ( 74.1%)           |
| - Missing                       | 3                       | 8                             | 11                    |
| Verbal response                 |                         |                               |                       |
| - 1-None                        | 2 ( 12.5%)              | 0 ( 0.0%)                     | 2 ( 7.7%)             |
| - 2-Incomprehensible            | 1 ( 6.3%)               | 0 ( 0.0%)                     | 1 ( 3.8%)             |
| - 3-Inappropriate               | 1 ( 6.3%)               | 3 ( 30.0%)                    | 4 ( 15.4%)            |
| - 4-Confused                    | 6 ( 37.5%)              | 5 ( 50.0%)                    | 11 ( 42.3%)           |
| - 5-Oriented                    | 6 ( 37.5%)              | 2 ( 20.0%)                    | 8 ( 30.8%)            |
| - Missing                       | 3                       | 9                             | 12                    |
| GCS Total                       |                         |                               |                       |
| - N                             | 16                      | 11                            | 27                    |
| - Mean +/- SD                   | 12.2 +/-3.9             | 12.8 +/-2.8                   | 12.4 +/-3.4           |
| - Median                        | 13.0                    | 13.0                          | 13.0                  |
| - p25, p75                      | 12.0, 15.0              | 13.0, 14.0                    | 12.0, 15.0            |
| - Min, Max                      | 3.0, 15.0               | 5.0, 15.0                     | 3.0, 15.0             |
| - Missing                       | 3                       | 8                             | 11                    |

**Table 10.3.9: Glasgow Coma Scale - pre-randomization (FAS)**

|                        | <b>Placebo<br/>N=19</b> | <b>Dexamethasone<br/>N=19</b> | <b>Total<br/>N=38</b> |
|------------------------|-------------------------|-------------------------------|-----------------------|
| <b>Eye opening</b>     |                         |                               |                       |
| - 1-None               | 2 ( 10.5%)              | 1 ( 5.3%)                     | 3 ( 7.9%)             |
| - 2-To pain            | 0 ( 0.0%)               | 1 ( 5.3%)                     | 1 ( 2.6%)             |
| - 3-To speech          | 4 ( 21.1%)              | 5 ( 26.3%)                    | 9 ( 23.7%)            |
| - 4-Spontaneous        | 13 ( 68.4%)             | 12 ( 63.2%)                   | 25 ( 65.8%)           |
| <b>Motor response</b>  |                         |                               |                       |
| - 1-None               | 2 ( 10.5%)              | 1 ( 5.3%)                     | 3 ( 7.9%)             |
| - 2-Extension          | 0 ( 0.0%)               | 1 ( 5.3%)                     | 1 ( 2.6%)             |
| - 3-Flexor response    | 0 ( 0.0%)               | 1 ( 5.3%)                     | 1 ( 2.6%)             |
| - 4-Withdrawal         | 1 ( 5.3%)               | 1 ( 5.3%)                     | 2 ( 5.3%)             |
| - 5-Localizes pain     | 5 ( 26.3%)              | 1 ( 5.3%)                     | 6 ( 15.8%)            |
| - 6-Obeys commands     | 11 ( 57.9%)             | 14 ( 73.7%)                   | 25 ( 65.8%)           |
| <b>Verbal response</b> |                         |                               |                       |
| - 1-None               | 2 ( 11.1%)              | 3 ( 15.8%)                    | 5 ( 13.5%)            |
| - 2-Incomprehensible   | 3 ( 16.7%)              | 0 ( 0.0%)                     | 3 ( 8.1%)             |
| - 3-Inappropriate      | 0 ( 0.0%)               | 4 ( 21.1%)                    | 4 ( 10.8%)            |
| - 4-Confused           | 7 ( 38.9%)              | 7 ( 36.8%)                    | 14 ( 37.8%)           |
| - 5-Oriented           | 6 ( 33.3%)              | 5 ( 26.3%)                    | 11 ( 29.7%)           |
| - Missing              | 1                       | 0                             | 1                     |
| <b>GCS Total</b>       |                         |                               |                       |
| - N                    | 18                      | 19                            | 37                    |
| - Mean +/- SD          | 12.2 +/-3.7             | 12.3 +/-3.5                   | 12.2 +/-3.6           |
| - Median               | 13.5                    | 13.0                          | 13.0                  |
| - p25, p75             | 11.0, 15.0              | 12.0, 15.0                    | 12.0, 15.0            |
| - Min, Max             | 3.0, 15.0               | 3.0, 15.0                     | 3.0, 15.0             |
| - Missing              | 1                       | 0                             | 1                     |

**Table 10.3.10: Pre-encephalitis Barthel index (FAS)**

|                                         | Placebo<br>N=19 | Dexamethasone<br>N=19 | Total<br>N=38 |
|-----------------------------------------|-----------------|-----------------------|---------------|
| <b>Feeding</b>                          |                 |                       |               |
| - 0-unable                              | 1 ( 5.3%)       | 0 ( 0.0%)             | 1 ( 2.6%)     |
| - 5-needs help                          | 1 ( 5.3%)       | 1 ( 5.3%)             | 2 ( 5.3%)     |
| - 10-independent                        | 17 ( 89.5%)     | 18 ( 94.7%)           | 35 ( 92.1%)   |
| <b>Bathing</b>                          |                 |                       |               |
| - 0-dependent                           | 1 ( 5.3%)       | 1 ( 5.3%)             | 2 ( 5.3%)     |
| - 5-independent                         | 18 ( 94.7%)     | 18 ( 94.7%)           | 36 ( 94.7%)   |
| <b>Grooming</b>                         |                 |                       |               |
| - 0-needs to help                       | 2 ( 10.5%)      | 1 ( 5.3%)             | 3 ( 7.9%)     |
| - 5-independent                         | 17 ( 89.5%)     | 18 ( 94.7%)           | 35 ( 92.1%)   |
| <b>Dressing</b>                         |                 |                       |               |
| - 0-dependent                           | 1 ( 5.3%)       | 1 ( 5.3%)             | 2 ( 5.3%)     |
| - 5-needs help                          | 2 ( 10.5%)      | 0 ( 0.0%)             | 2 ( 5.3%)     |
| - 10-independent                        | 16 ( 84.2%)     | 18 ( 94.7%)           | 34 ( 89.5%)   |
| <b>Bowels</b>                           |                 |                       |               |
| - 0-incontinent                         | 2 ( 10.5%)      | 1 ( 5.3%)             | 3 ( 7.9%)     |
| - 10-continent                          | 17 ( 89.5%)     | 18 ( 94.7%)           | 35 ( 92.1%)   |
| <b>Bladder</b>                          |                 |                       |               |
| - 0-incontinent/catheterized            | 2 ( 10.5%)      | 1 ( 5.3%)             | 3 ( 7.9%)     |
| - 10-continent                          | 17 ( 89.5%)     | 18 ( 94.7%)           | 35 ( 92.1%)   |
| <b>Toilet Use</b>                       |                 |                       |               |
| - 0-dependent                           | 1 ( 5.3%)       | 1 ( 5.3%)             | 2 ( 5.3%)     |
| - 5-needs some help                     | 1 ( 5.3%)       | 0 ( 0.0%)             | 1 ( 2.6%)     |
| - 10-independent                        | 17 ( 89.5%)     | 18 ( 94.7%)           | 35 ( 92.1%)   |
| <b>Transfer (bed to chair and back)</b> |                 |                       |               |
| - 5-major help                          | 1 ( 5.3%)       | 1 ( 5.3%)             | 2 ( 5.3%)     |
| - 10-minor help                         | 2 ( 10.5%)      | 0 ( 0.0%)             | 2 ( 5.3%)     |
| - 15-independent                        | 16 ( 84.2%)     | 18 ( 94.7%)           | 34 ( 89.5%)   |
| <b>Mobility (on level surfaces)</b>     |                 |                       |               |
| - 0-immobile                            | 1 ( 5.3%)       | 1 ( 5.3%)             | 2 ( 5.3%)     |
| - 5-wheelchair independent              | 1 ( 5.3%)       | 0 ( 0.0%)             | 1 ( 2.6%)     |
| - 10-walks with help                    | 1 ( 5.3%)       | 0 ( 0.0%)             | 1 ( 2.6%)     |
| - 15-independent                        | 16 ( 84.2%)     | 18 ( 94.7%)           | 34 ( 89.5%)   |
| <b>Stairs</b>                           |                 |                       |               |
| - 0-unable                              | 2 ( 10.5%)      | 1 ( 5.3%)             | 3 ( 7.9%)     |
| - 10-independent                        | 17 ( 89.5%)     | 18 ( 94.7%)           | 35 ( 92.1%)   |
| <b>Barthel Index Total</b>              |                 |                       |               |
| - N                                     | 19              | 19                    | 38            |
| - Mean +/- SD                           | 90.8 +/-24.3    | 95.3 +/-20.6          | 93.0 +/-22.3  |
| - Median                                | 100.0           | 100.0                 | 100.0         |
| - p25, p75                              | 100.0, 100.0    | 100.0, 100.0          | 100.0, 100.0  |
| - Min, Max                              | 20.0, 100.0     | 10.0, 100.0           | 10.0, 100.0   |
| - Missing                               | 0               | 0                     | 0             |

**Table 10.3.11: Pre-encephalitis mRS (FAS)**

|                               | <b>Placebo<br/>N=19</b> | <b>Dexamethasone<br/>N=19</b> | <b>Total<br/>N=38</b> |
|-------------------------------|-------------------------|-------------------------------|-----------------------|
| Pre-encephalitis mRS          |                         |                               |                       |
| - 0-No symptoms at all        | 17 ( 89.5%)             | 14 ( 73.7%)                   | 31 ( 81.6%)           |
| - 1-No significant disability | 0 ( 0.0%)               | 4 ( 21.1%)                    | 4 ( 10.5%)            |
| - 2-Slight disability         | 2 ( 10.5%)              | 1 ( 5.3%)                     | 3 ( 7.9%)             |

**Table 10.3.12: NIH scale day 0 (FAS)**

|                                    | <b>Placebo<br/>N=19</b> | <b>Dexamethasone<br/>N=19</b> | <b>Total<br/>N=38</b> |
|------------------------------------|-------------------------|-------------------------------|-----------------------|
| Level of consciousness             |                         |                               |                       |
| - 0-Alert                          | 6 ( 31.6%)              | 9 ( 47.4%)                    | 15 ( 39.5%)           |
| - 1-Drowsy                         | 9 ( 47.4%)              | 7 ( 36.8%)                    | 16 ( 42.1%)           |
| - 2-Stuporous                      | 2 ( 10.5%)              | 0 ( 0.0%)                     | 2 ( 5.3%)             |
| - 3-Coma                           | 2 ( 10.5%)              | 3 ( 15.8%)                    | 5 ( 13.2%)            |
| Level of consciousness - questions |                         |                               |                       |
| - 0-Answers both correctly         | 5 ( 26.3%)              | 4 ( 21.1%)                    | 9 ( 23.7%)            |
| - 1-Answers one correctly          | 3 ( 15.8%)              | 7 ( 36.8%)                    | 10 ( 26.3%)           |
| - 2-Incorrect                      | 11 ( 57.9%)             | 8 ( 42.1%)                    | 19 ( 50.0%)           |
| Level of consciousness - commands  |                         |                               |                       |
| - 0-Obeys both correctly           | 8 ( 42.1%)              | 12 ( 63.2%)                   | 20 ( 52.6%)           |
| - 1-Obeys one correctly            | 6 ( 31.6%)              | 3 ( 15.8%)                    | 9 ( 23.7%)            |
| - 2-Incorrect                      | 5 ( 26.3%)              | 4 ( 21.1%)                    | 9 ( 23.7%)            |
| Pupillary response                 |                         |                               |                       |
| - 0-Both reactive                  | 18 ( 94.7%)             | 18 ( 94.7%)                   | 36 ( 94.7%)           |
| - 2-Neither reactive               | 1 ( 5.3%)               | 1 ( 5.3%)                     | 2 ( 5.3%)             |
| Best gaze                          |                         |                               |                       |
| - 0-Normal                         | 18 ( 94.7%)             | 17 ( 89.5%)                   | 35 ( 92.1%)           |
| - 1-Partial gaze palsy             | 1 ( 5.3%)               | 1 ( 5.3%)                     | 2 ( 5.3%)             |
| - 2-Forced deviation               | 0 ( 0.0%)               | 1 ( 5.3%)                     | 1 ( 2.6%)             |
| Best visual                        |                         |                               |                       |
| - 0-No visual loss                 | 19 (100.0%)             | 18 ( 94.7%)                   | 37 ( 97.4%)           |
| - 2-Complete hemianopia            | 0 ( 0.0%)               | 1 ( 5.3%)                     | 1 ( 2.6%)             |
| Facial palsy                       |                         |                               |                       |
| - 0-Normal                         | 14 ( 73.7%)             | 17 ( 89.5%)                   | 31 ( 81.6%)           |
| - 1-Minor                          | 3 ( 15.8%)              | 1 ( 5.3%)                     | 4 ( 10.5%)            |
| - 2-Partial                        | 2 ( 10.5%)              | 0 ( 0.0%)                     | 2 ( 5.3%)             |
| - 3-Complete                       | 0 ( 0.0%)               | 1 ( 5.3%)                     | 1 ( 2.6%)             |
| Best motor - arm                   |                         |                               |                       |
| - 0-No drift                       | 13 ( 68.4%)             | 14 ( 73.7%)                   | 27 ( 71.1%)           |
| - 1-Drift                          | 3 ( 15.8%)              | 2 ( 10.5%)                    | 5 ( 13.2%)            |
| - 2-Cannot resist gravity          | 1 ( 5.3%)               | 1 ( 5.3%)                     | 2 ( 5.3%)             |
| - 3-No effort against gravity      | 2 ( 10.5%)              | 2 ( 10.5%)                    | 4 ( 10.5%)            |

|                                  | Placebo<br>N=19 | Dexamethasone<br>N=19 | Total<br>N=38 |
|----------------------------------|-----------------|-----------------------|---------------|
| <b>Best motor - leg</b>          |                 |                       |               |
| - 0-No drift                     | 12 ( 63.2%)     | 15 ( 78.9%)           | 27 ( 71.1%)   |
| - 1-Drift                        | 3 ( 15.8%)      | 2 ( 10.5%)            | 5 ( 13.2%)    |
| - 2-Cannot resist gravity        | 2 ( 10.5%)      | 0 ( 0.0%)             | 2 ( 5.3%)     |
| - 3-No effort against gravity    | 2 ( 10.5%)      | 2 ( 10.5%)            | 4 ( 10.5%)    |
| <b>Plantar reflex</b>            |                 |                       |               |
| - 0-Normal                       | 14 ( 73.7%)     | 17 ( 89.5%)           | 31 ( 81.6%)   |
| - 1-Equivocal                    | 2 ( 10.5%)      | 0 ( 0.0%)             | 2 ( 5.3%)     |
| - 2-One extensor                 | 3 ( 15.8%)      | 1 ( 5.3%)             | 4 ( 10.5%)    |
| - 3-Bilateral extensor           | 0 ( 0.0%)       | 1 ( 5.3%)             | 1 ( 2.6%)     |
| <b>Limb ataxia</b>               |                 |                       |               |
| - 0-Absent                       | 16 ( 84.2%)     | 18 ( 94.7%)           | 34 ( 89.5%)   |
| - 1-Present in arm or leg        | 2 ( 10.5%)      | 1 ( 5.3%)             | 3 ( 7.9%)     |
| - 2-Present in arm and leg       | 1 ( 5.3%)       | 0 ( 0.0%)             | 1 ( 2.6%)     |
| <b>Sensory</b>                   |                 |                       |               |
| - 0-Normal                       | 15 ( 78.9%)     | 16 ( 84.2%)           | 31 ( 81.6%)   |
| - 1-Partial loss                 | 3 ( 15.8%)      | 2 ( 10.5%)            | 5 ( 13.2%)    |
| - 2-Dense loss                   | 1 ( 5.3%)       | 1 ( 5.3%)             | 2 ( 5.3%)     |
| <b>Neglect</b>                   |                 |                       |               |
| - 0-No neglect                   | 17 ( 89.5%)     | 16 ( 84.2%)           | 33 ( 86.8%)   |
| - 1-Partial neglect              | 0 ( 0.0%)       | 2 ( 10.5%)            | 2 ( 5.3%)     |
| - 2-Complete neglect             | 2 ( 10.5%)      | 1 ( 5.3%)             | 3 ( 7.9%)     |
| <b>Dysarthria</b>                |                 |                       |               |
| - 0-Normal articulation          | 13 ( 68.4%)     | 11 ( 57.9%)           | 24 ( 63.2%)   |
| - 1-Mild to moderate dysarthria  | 3 ( 15.8%)      | 5 ( 26.3%)            | 8 ( 21.1%)    |
| - 2-Near unintelligible or worse | 3 ( 15.8%)      | 3 ( 15.8%)            | 6 ( 15.8%)    |
| <b>Best language</b>             |                 |                       |               |
| - 0-No aphasia                   | 6 ( 31.6%)      | 4 ( 21.1%)            | 10 ( 26.3%)   |
| - 1-Mild to moderate aphasia     | 5 ( 26.3%)      | 6 ( 31.6%)            | 11 ( 28.9%)   |
| - 2-Severe aphasia               | 6 ( 31.6%)      | 6 ( 31.6%)            | 12 ( 31.6%)   |
| - 3-Mute                         | 2 ( 10.5%)      | 3 ( 15.8%)            | 5 ( 13.2%)    |
| <b>NIH Total</b>                 |                 |                       |               |
| - N                              | 19              | 19                    | 38            |
| - Mean +/- SD                    | 7.7 +/-6.6      | 6.9 +/-7.6            | 7.3 +/-7.0    |
| - Median                         | 6.0             | 5.0                   | 6.0           |
| - p25, p75                       | 3.0, 10.0       | 2.0, 9.0              | 2.0, 9.0      |
| - Min, Max                       | 0.0, 23.0       | 0.0, 31.0             | 0.0, 31.0     |
| - Missing                        | 0               | 0                     | 0             |



**Table 10.3.13: Mini-Mental test day 0 (FAS)**

|                              | <b>Placebo<br/>N=19</b> | <b>Dexamethasone<br/>N=19</b> | <b>Total<br/>N=38</b> |
|------------------------------|-------------------------|-------------------------------|-----------------------|
| <b>Orientation</b>           |                         |                               |                       |
| - N                          | 9                       | 9                             | 18                    |
| - Mean +/- SD                | 5.8 +/-4.5              | 5.1 +/-3.5                    | 5.4 +/-3.9            |
| - Median                     | 8.0                     | 5.0                           | 6.0                   |
| - p25, p75                   | 0.0, 9.0                | 3.0, 8.0                      | 1.0, 9.0              |
| - Min, Max                   | 0.0, 10.0               | 0.0, 10.0                     | 0.0, 10.0             |
| - Missing                    | 10                      | 10                            | 20                    |
| <b>Immediate recall</b>      |                         |                               |                       |
| - N                          | 9                       | 9                             | 18                    |
| - Mean +/- SD                | 1.9 +/-1.5              | 2.3 +/-1.1                    | 2.1 +/-1.3            |
| - Median                     | 3.0                     | 3.0                           | 3.0                   |
| - p25, p75                   | 0.0, 3.0                | 2.0, 3.0                      | 1.0, 3.0              |
| - Min, Max                   | 0.0, 3.0                | 0.0, 3.0                      | 0.0, 3.0              |
| - Missing                    | 10                      | 10                            | 20                    |
| <b>Serial 7s total</b>       |                         |                               |                       |
| - N                          | 9                       | 9                             | 18                    |
| - Mean +/- SD                | 2.4 +/-2.2              | 1.4 +/-1.7                    | 1.9 +/-2.0            |
| - Median                     | 1.0                     | 1.0                           | 1.0                   |
| - p25, p75                   | 1.0, 5.0                | 0.0, 2.0                      | 0.0, 4.0              |
| - Min, Max                   | 0.0, 5.0                | 0.0, 4.0                      | 0.0, 5.0              |
| - Missing                    | 10                      | 10                            | 20                    |
| <b>Delayed verbal recall</b> |                         |                               |                       |
| - N                          | 9                       | 9                             | 18                    |
| - Mean +/- SD                | 0.6 +/-1.1              | 0.6 +/-1.0                    | 0.6 +/-1.0            |
| - Median                     | 0.0                     | 0.0                           | 0.0                   |
| - p25, p75                   | 0.0, 0.0                | 0.0, 1.0                      | 0.0, 1.0              |
| - Min, Max                   | 0.0, 3.0                | 0.0, 3.0                      | 0.0, 3.0              |
| - Missing                    | 10                      | 10                            | 20                    |
| <b>Naming</b>                |                         |                               |                       |
| - N                          | 9                       | 9                             | 18                    |
| - Mean +/- SD                | 6.0 +/-3.4              | 6.2 +/-3.3                    | 6.1 +/-3.3            |
| - Median                     | 7.0                     | 8.0                           | 7.5                   |
| - p25, p75                   | 5.0, 9.0                | 5.0, 9.0                      | 5.0, 9.0              |
| - Min, Max                   | 0.0, 9.0                | 0.0, 9.0                      | 0.0, 9.0              |
| - Missing                    | 10                      | 10                            | 20                    |
| <b>Total score</b>           |                         |                               |                       |
| - N                          | 9                       | 9                             | 18                    |
| - Mean +/- SD                | 16.7 +/-11.4            | 15.7 +/-9.3                   | 16.2 +/-10.1          |
| - Median                     | 20.0                    | 15.0                          | 17.5                  |
| - p25, p75                   | 7.0, 26.0               | 10.0, 24.0                    | 7.0, 26.0             |
| - Min, Max                   | 0.0, 29.0               | 0.0, 27.0                     | 0.0, 29.0             |
| - Missing                    | 10                      | 10                            | 20                    |

### 10.3.2 Per protocol set

**Table 10.3.14: Demographics (PP set)**

|               | Placebo<br>N=9 | Dexamethasone<br>N=7 | Total<br>N=16 |
|---------------|----------------|----------------------|---------------|
| Gender        |                |                      |               |
| - male        | 7 ( 77.8%)     | 5 ( 71.4%)           | 12 ( 75.0%)   |
| - female      | 2 ( 22.2%)     | 2 ( 28.6%)           | 4 ( 25.0%)    |
| Age           |                |                      |               |
| - N           | 9              | 7                    | 16            |
| - Mean +/- SD | 59.6 +/-13.9   | 61.3 +/-11.1         | 60.3 +/-12.4  |
| - Median      | 62.0           | 62.0                 | 62.0          |
| - p25, p75    | 51.0, 68.0     | 49.0, 71.0           | 50.0, 69.5    |
| - Min, Max    | 39.0, 78.0     | 46.0, 77.0           | 39.0, 78.0    |
| - Missing     | 0              | 0                    | 0             |

**Table 10.3.15: Educational status (PP set)**

|                                                                                  | Placebo<br>N=9 | Dexamethasone<br>N=7 | Total<br>N=16 |
|----------------------------------------------------------------------------------|----------------|----------------------|---------------|
| Höchster allgemeinbildender Schulabschluss                                       |                |                      |               |
| - Hauptschulabschluss                                                            | 3 ( 50.0%)     | 4 ( 66.7%)           | 7 ( 58.3%)    |
| - Realschulabschluss                                                             | 1 ( 16.7%)     | 1 ( 16.7%)           | 2 ( 16.7%)    |
| - Polytechnische Oberschule 10. Klasse                                           | 1 ( 16.7%)     | 0 ( 0.0%)            | 1 ( 8.3%)     |
| - Abitur                                                                         | 1 ( 16.7%)     | 1 ( 16.7%)           | 2 ( 16.7%)    |
| - Missing                                                                        | 3              | 1                    | 4             |
| Beruflicher Ausbildungsabschluss                                                 |                |                      |               |
| - Lehre abgeschlossen                                                            | 4 ( 66.7%)     | 3 ( 50.0%)           | 7 ( 58.3%)    |
| - Berufsfachschule, Handelsschule abgeschlossen                                  | 1 ( 16.7%)     | 1 ( 16.7%)           | 2 ( 16.7%)    |
| - Fachschule, Meister-, Technikerschule, Berufs- oder Fachakademie abgeschlossen | 1 ( 16.7%)     | 1 ( 16.7%)           | 2 ( 16.7%)    |
| - Hochschulabschluss                                                             | 0 ( 0.0%)      | 1 ( 16.7%)           | 1 ( 8.3%)     |
| - Missing                                                                        | 3              | 1                    | 4             |

**Table 10.3.16: Vital signs (PP set)**

|                                        | <b>Placebo<br/>N=9</b> | <b>Dexamethasone<br/>N=7</b> | <b>Total<br/>N=16</b> |
|----------------------------------------|------------------------|------------------------------|-----------------------|
| <b>Weight (kg)</b>                     |                        |                              |                       |
| - N                                    | 9                      | 6                            | 15                    |
| - Mean +/- SD                          | 79.2 +/-9.8            | 86.0 +/-16.5                 | 81.9 +/-12.8          |
| - Median                               | 77.0                   | 84.0                         | 80.0                  |
| - p25, p75                             | 72.0, 81.0             | 70.0, 100.0                  | 71.5, 88.0            |
| - Min, Max                             | 68.0, 100.0            | 68.0, 110.0                  | 68.0, 110.0           |
| - Missing                              | 0                      | 1                            | 1                     |
| <b>BMI</b>                             |                        |                              |                       |
| - N                                    | 8                      | 5                            | 13                    |
| - Mean +/- SD                          | 26.3 +/-3.8            | 27.3 +/-3.0                  | 26.7 +/-3.4           |
| - Median                               | 26.0                   | 27.7                         | 26.6                  |
| - p25, p75                             | 22.9, 30.2             | 25.1, 27.7                   | 24.2, 29.4            |
| - Min, Max                             | 21.6, 30.9             | 24.2, 31.8                   | 21.6, 31.8            |
| - Missing                              | 1                      | 2                            | 3                     |
| <b>Temperature (°C)</b>                |                        |                              |                       |
| - N                                    | 9                      | 6                            | 15                    |
| - Mean +/- SD                          | 38.0 +/-0.7            | 37.8 +/-1.0                  | 37.9 +/-0.8           |
| - Median                               | 38.3                   | 37.7                         | 38.1                  |
| - p25, p75                             | 37.6, 38.3             | 36.8, 38.8                   | 37.4, 38.4            |
| - Min, Max                             | 36.6, 38.8             | 36.8, 39.1                   | 36.6, 39.1            |
| - Missing                              | 0                      | 1                            | 1                     |
| <b>Heart rate (bpm)</b>                |                        |                              |                       |
| - N                                    | 9                      | 6                            | 15                    |
| - Mean +/- SD                          | 85.6 +/-22.9           | 85.0 +/-17.7                 | 85.3 +/-20.3          |
| - Median                               | 76.0                   | 81.0                         | 76.0                  |
| - p25, p75                             | 72.0, 93.0             | 70.0, 94.0                   | 70.0, 94.0            |
| - Min, Max                             | 59.0, 130.0            | 70.0, 114.0                  | 59.0, 130.0           |
| - Missing                              | 0                      | 1                            | 1                     |
| <b>Systolic blood pressure (mmHg)</b>  |                        |                              |                       |
| - N                                    | 9                      | 6                            | 15                    |
| - Mean +/- SD                          | 135.6 +/-10.6          | 145.5 +/-19.1                | 139.5 +/-14.8         |
| - Median                               | 140.0                  | 152.0                        | 140.0                 |
| - p25, p75                             | 129.0, 140.0           | 130.0, 160.0                 | 129.0, 150.0          |
| - Min, Max                             | 116.0, 150.0           | 115.0, 164.0                 | 115.0, 164.0          |
| - Missing                              | 0                      | 1                            | 1                     |
| <b>Diastolic blood pressure (mmHg)</b> |                        |                              |                       |
| - N                                    | 9                      | 6                            | 15                    |
| - Mean +/- SD                          | 74.7 +/-11.0           | 75.8 +/-9.8                  | 75.1 +/-10.2          |
| - Median                               | 80.0                   | 77.5                         | 80.0                  |
| - p25, p75                             | 75.0, 80.0             | 71.0, 80.0                   | 71.0, 80.0            |
| - Min, Max                             | 53.0, 85.0             | 60.0, 89.0                   | 53.0, 89.0            |
| - Missing                              | 0                      | 1                            | 1                     |

**Table 10.3.17: Physical examination (PP set)**

|                                 | <b>Placebo<br/>N=9</b> | <b>Dexamethasone<br/>N=7</b> | <b>Total<br/>N=16</b> |
|---------------------------------|------------------------|------------------------------|-----------------------|
| <b>General appearance</b>       |                        |                              |                       |
| - normal                        | 9 (100.0%)             | 5 (71.4%)                    | 14 (87.5%)            |
| - abnormal                      | 0 (0.0%)               | 2 (28.6%)                    | 2 (12.5%)             |
| <b>Head &amp; Neck</b>          |                        |                              |                       |
| - normal                        | 8 (88.9%)              | 5 (71.4%)                    | 13 (81.3%)            |
| - abnormal                      | 1 (11.1%)              | 1 (14.3%)                    | 2 (12.5%)             |
| - not done                      | 0 (0.0%)               | 1 (14.3%)                    | 1 (6.3%)              |
| <b>Eyes &amp; Ears</b>          |                        |                              |                       |
| - normal                        | 9 (100.0%)             | 5 (71.4%)                    | 14 (87.5%)            |
| - abnormal                      | 0 (0.0%)               | 1 (14.3%)                    | 1 (6.3%)              |
| - not done                      | 0 (0.0%)               | 1 (14.3%)                    | 1 (6.3%)              |
| <b>Nose &amp; Throat</b>        |                        |                              |                       |
| - normal                        | 9 (100.0%)             | 6 (85.7%)                    | 15 (93.8%)            |
| - not done                      | 0 (0.0%)               | 1 (14.3%)                    | 1 (6.3%)              |
| <b>Chest</b>                    |                        |                              |                       |
| - normal                        | 7 (77.8%)              | 6 (85.7%)                    | 13 (81.3%)            |
| - abnormal                      | 1 (11.1%)              | 0 (0.0%)                     | 1 (6.3%)              |
| - not done                      | 1 (11.1%)              | 1 (14.3%)                    | 2 (12.5%)             |
| <b>Lungs</b>                    |                        |                              |                       |
| - normal                        | 8 (88.9%)              | 6 (85.7%)                    | 14 (87.5%)            |
| - abnormal                      | 1 (11.1%)              | 0 (0.0%)                     | 1 (6.3%)              |
| - not done                      | 0 (0.0%)               | 1 (14.3%)                    | 1 (6.3%)              |
| <b>Heart</b>                    |                        |                              |                       |
| - normal                        | 6 (66.7%)              | 5 (71.4%)                    | 11 (68.8%)            |
| - abnormal                      | 3 (33.3%)              | 1 (14.3%)                    | 4 (25.0%)             |
| - not done                      | 0 (0.0%)               | 1 (14.3%)                    | 1 (6.3%)              |
| <b>Abdomen</b>                  |                        |                              |                       |
| - normal                        | 9 (100.0%)             | 6 (85.7%)                    | 15 (93.8%)            |
| - not done                      | 0 (0.0%)               | 1 (14.3%)                    | 1 (6.3%)              |
| <b>Extremities &amp; Joints</b> |                        |                              |                       |
| - normal                        | 9 (100.0%)             | 6 (85.7%)                    | 15 (93.8%)            |
| - not done                      | 0 (0.0%)               | 1 (14.3%)                    | 1 (6.3%)              |
| <b>Lymph Nodes</b>              |                        |                              |                       |
| - normal                        | 9 (100.0%)             | 6 (85.7%)                    | 15 (93.8%)            |
| - not done                      | 0 (0.0%)               | 1 (14.3%)                    | 1 (6.3%)              |
| <b>Skin</b>                     |                        |                              |                       |
| - normal                        | 9 (100.0%)             | 3 (42.9%)                    | 12 (75.0%)            |
| - abnormal                      | 0 (0.0%)               | 3 (42.9%)                    | 3 (18.8%)             |
| - not done                      | 0 (0.0%)               | 1 (14.3%)                    | 1 (6.3%)              |

**Table 10.3.18: Diagnosis (PP set)**

|                                           | Placebo<br>N=9 | Dexamethasone<br>N=7 | Total<br>N=16 |
|-------------------------------------------|----------------|----------------------|---------------|
| Focal neurological signs                  |                |                      |               |
| - no                                      | 3 ( 33.3%)     | 1 ( 14.3%)           | 4 ( 25.0%)    |
| - yes                                     | 6 ( 66.7%)     | 6 ( 85.7%)           | 12 ( 75.0%)   |
| Result of polymerase chain reaction assay |                |                      |               |
| - positive                                | 9 (100.0%)     | 7 (100.0%)           | 16 (100.0%)   |
| Seizures within the last five days        |                |                      |               |
| - no                                      | 5 ( 55.6%)     | 3 ( 42.9%)           | 8 ( 50.0%)    |
| - yes                                     | 4 ( 44.4%)     | 4 ( 57.1%)           | 8 ( 50.0%)    |

**Table 10.3.19: Seizures (PP set)**

|                              | Placebo<br>N=9 | Dexamethasone<br>N=7 | Total<br>N=16 |
|------------------------------|----------------|----------------------|---------------|
| Focal continuously           |                |                      |               |
| - no                         | 3 ( 75.0%)     | 4 (100.0%)           | 7 ( 87.5%)    |
| - yes                        | 1 ( 25.0%)     | 0 ( 0.0%)            | 1 ( 12.5%)    |
| Focal non continuously       |                |                      |               |
| - no                         | 4 (100.0%)     | 2 ( 50.0%)           | 6 ( 75.0%)    |
| - yes                        | 0 ( 0.0%)      | 2 ( 50.0%)           | 2 ( 25.0%)    |
| Generalized continuously     |                |                      |               |
| - no                         | 3 ( 75.0%)     | 4 (100.0%)           | 7 ( 87.5%)    |
| - yes                        | 1 ( 25.0%)     | 0 ( 0.0%)            | 1 ( 12.5%)    |
| Generalized non continuously |                |                      |               |
| - no                         | 2 ( 50.0%)     | 2 ( 50.0%)           | 4 ( 50.0%)    |
| - yes                        | 2 ( 50.0%)     | 2 ( 50.0%)           | 4 ( 50.0%)    |

**Table 10.3.20: Listing of seizures (PP set)**

| group         | focal        |        | focal non    |        | generalized  |        | generalized non |        |  |
|---------------|--------------|--------|--------------|--------|--------------|--------|-----------------|--------|--|
|               | continuously | amount | continuously | amount | continuously | amount | continuously    | amount |  |
| Placebo       | no           | .      | no           | .      | no           | .      | yes             | 1      |  |
| Dexamethasone | no           | .      | yes          | 1      | no           | .      | no              | .      |  |
| Placebo       | no           | .      | no           | .      | no           | .      | yes             | 1      |  |
| Dexamethasone | no           | .      | no           | .      | no           | .      | yes             | 1      |  |
| Placebo       | yes          | A      | no           | .      | no           | .      | no              | .      |  |
| Placebo       | no           | .      | no           | .      | yes          | 1      | no              | .      |  |
| Dexamethasone | no           | .      | yes          | 1      | no           | .      | no              | .      |  |

**Table 10.3.21: Glasgow Coma Scale on admission (PP set)**

|                                 | <b>Placebo<br/>N=9</b> | <b>Dexamethasone<br/>N=7</b> | <b>Total<br/>N=16</b> |
|---------------------------------|------------------------|------------------------------|-----------------------|
| Glasgow Coma Scale on admission |                        |                              |                       |
| - not done                      | 1 ( 11.1%)             | 3 ( 42.9%)                   | 4 ( 25.0%)            |
| - done                          | 8 ( 88.9%)             | 4 ( 57.1%)                   | 12 ( 75.0%)           |
| Eye opening                     |                        |                              |                       |
| - 1-None                        | 1 ( 12.5%)             | 0 ( 0.0%)                    | 1 ( 8.3%)             |
| - 3-To speech                   | 2 ( 25.0%)             | 1 ( 25.0%)                   | 3 ( 25.0%)            |
| - 4-Spontaneous                 | 5 ( 62.5%)             | 3 ( 75.0%)                   | 8 ( 66.7%)            |
| - Missing                       | 1                      | 3                            | 4                     |
| Motor response                  |                        |                              |                       |
| - 1-None                        | 1 ( 12.5%)             | 0 ( 0.0%)                    | 1 ( 8.3%)             |
| - 5-Localizes pain              | 2 ( 25.0%)             | 1 ( 25.0%)                   | 3 ( 25.0%)            |
| - 6-Obeys commands              | 5 ( 62.5%)             | 3 ( 75.0%)                   | 8 ( 66.7%)            |
| - Missing                       | 1                      | 3                            | 4                     |
| Verbal response                 |                        |                              |                       |
| - 1-None                        | 1 ( 12.5%)             | 0 ( 0.0%)                    | 1 ( 8.3%)             |
| - 3-Inappropriate               | 1 ( 12.5%)             | 1 ( 25.0%)                   | 2 ( 16.7%)            |
| - 4-Confused                    | 3 ( 37.5%)             | 2 ( 50.0%)                   | 5 ( 41.7%)            |
| - 5-Oriented                    | 3 ( 37.5%)             | 1 ( 25.0%)                   | 4 ( 33.3%)            |
| - Missing                       | 1                      | 3                            | 4                     |
| GCS Total                       |                        |                              |                       |
| - N                             | 8                      | 4                            | 12                    |
| - Mean +/- SD                   | 12.4 +/-4.0            | 13.5 +/-1.3                  | 12.8 +/-3.3           |
| - Median                        | 13.5                   | 13.5                         | 13.5                  |
| - p25, p75                      | 12.0, 15.0             | 12.5, 14.5                   | 12.0, 15.0            |
| - Min, Max                      | 3.0, 15.0              | 12.0, 15.0                   | 3.0, 15.0             |
| - Missing                       | 1                      | 3                            | 4                     |

**Table 10.3.22: Glasgow Coma Scale - pre-randomization (PP set)**

|                      | <b>Placebo<br/>N=9</b> | <b>Dexamethasone<br/>N=7</b> | <b>Total<br/>N=16</b> |
|----------------------|------------------------|------------------------------|-----------------------|
| Eye opening          |                        |                              |                       |
| - 1-None             | 1 ( 11.1%)             | 0 ( 0.0%)                    | 1 ( 6.3%)             |
| - 3-To speech        | 1 ( 11.1%)             | 3 ( 42.9%)                   | 4 ( 25.0%)            |
| - 4-Spontaneous      | 7 ( 77.8%)             | 4 ( 57.1%)                   | 11 ( 68.8%)           |
| Motor response       |                        |                              |                       |
| - 1-None             | 1 ( 11.1%)             | 0 ( 0.0%)                    | 1 ( 6.3%)             |
| - 3-Flexor response  | 0 ( 0.0%)              | 1 ( 14.3%)                   | 1 ( 6.3%)             |
| - 5-Localizes pain   | 3 ( 33.3%)             | 0 ( 0.0%)                    | 3 ( 18.8%)            |
| - 6-Obeys commands   | 5 ( 55.6%)             | 6 ( 85.7%)                   | 11 ( 68.8%)           |
| Verbal response      |                        |                              |                       |
| - 1-None             | 1 ( 12.5%)             | 1 ( 14.3%)                   | 2 ( 13.3%)            |
| - 2-Incomprehensible | 1 ( 12.5%)             | 0 ( 0.0%)                    | 1 ( 6.7%)             |
| - 3-Inappropriate    | 0 ( 0.0%)              | 1 ( 14.3%)                   | 1 ( 6.7%)             |
| - 4-Confused         | 3 ( 37.5%)             | 3 ( 42.9%)                   | 6 ( 40.0%)            |
| - 5-Oriented         | 3 ( 37.5%)             | 2 ( 28.6%)                   | 5 ( 33.3%)            |
| - Missing            | 1                      | 0                            | 1                     |
| GCS Total            |                        |                              |                       |
| - N                  | 8                      | 7                            | 15                    |
| - Mean +/- SD        | 12.3 +/-4.0            | 12.9 +/-2.7                  | 12.5 +/-3.4           |
| - Median             | 13.5                   | 13.0                         | 13.0                  |
| - p25, p75           | 11.5, 15.0             | 13.0, 15.0                   | 12.0, 15.0            |
| - Min, Max           | 3.0, 15.0              | 7.0, 15.0                    | 3.0, 15.0             |
| - Missing            | 1                      | 0                            | 1                     |

**Table 10.3.23: Pre-encephalitis Barthel index (PP set)**

|                                  | <b>Placebo<br/>N=9</b> | <b>Dexamethasone<br/>N=7</b> | <b>Total<br/>N=16</b> |
|----------------------------------|------------------------|------------------------------|-----------------------|
| Feeding                          |                        |                              |                       |
| - 10-independent                 | 9 (100.0%)             | 7 (100.0%)                   | 16 (100.0%)           |
| Bathing                          |                        |                              |                       |
| - 5-independent                  | 9 (100.0%)             | 7 (100.0%)                   | 16 (100.0%)           |
| Grooming                         |                        |                              |                       |
| - 5-independent                  | 9 (100.0%)             | 7 (100.0%)                   | 16 (100.0%)           |
| Dressing                         |                        |                              |                       |
| - 10-independent                 | 9 (100.0%)             | 7 (100.0%)                   | 16 (100.0%)           |
| Bowels                           |                        |                              |                       |
| - 10-continent                   | 9 (100.0%)             | 7 (100.0%)                   | 16 (100.0%)           |
| Bladder                          |                        |                              |                       |
| - 10-continent                   | 9 (100.0%)             | 7 (100.0%)                   | 16 (100.0%)           |
| Toilet Use                       |                        |                              |                       |
| - 10-independent                 | 9 (100.0%)             | 7 (100.0%)                   | 16 (100.0%)           |
| Transfer (bed to chair and back) |                        |                              |                       |
| - 15-independent                 | 9 (100.0%)             | 7 (100.0%)                   | 16 (100.0%)           |
| Mobility (on level surfaces)     |                        |                              |                       |
| - 15-independent                 | 9 (100.0%)             | 7 (100.0%)                   | 16 (100.0%)           |
| Stairs                           |                        |                              |                       |
| - 10-independent                 | 9 (100.0%)             | 7 (100.0%)                   | 16 (100.0%)           |
| Barthel Index Total              |                        |                              |                       |
| - N                              | 9                      | 7                            | 16                    |
| - Mean +/- SD                    | 100.0 +/-0.0           | 100.0 +/-0.0                 | 100.0 +/-0.0          |
| - Median                         | 100.0                  | 100.0                        | 100.0                 |
| - p25, p75                       | 100.0, 100.0           | 100.0, 100.0                 | 100.0, 100.0          |
| - Min, Max                       | 100.0, 100.0           | 100.0, 100.0                 | 100.0, 100.0          |
| - Missing                        | 0                      | 0                            | 0                     |

**Table 10.3.24: Pre-encephalitis mRS (PP set)**

|                               | <b>Placebo<br/>N=9</b> | <b>Dexamethasone<br/>N=7</b> | <b>Total<br/>N=16</b> |
|-------------------------------|------------------------|------------------------------|-----------------------|
| Pre-encephalitis mRS          |                        |                              |                       |
| - 0-No symptoms at all        | 8 ( 88.9%)             | 6 ( 85.7%)                   | 14 ( 87.5%)           |
| - 1-No significant disability | 0 ( 0.0%)              | 1 ( 14.3%)                   | 1 ( 6.3%)             |
| - 2-Slight disability         | 1 ( 11.1%)             | 0 ( 0.0%)                    | 1 ( 6.3%)             |



**Table 10.3.25: NIH scale day 0 (PP set)**

|                                    | <b>Placebo<br/>N=9</b> | <b>Dexamethasone<br/>N=7</b> | <b>Total<br/>N=16</b> |
|------------------------------------|------------------------|------------------------------|-----------------------|
| Level of consciousness             |                        |                              |                       |
| - 0-Alert                          | 6 ( 66.7%)             | 2 ( 28.6%)                   | 8 ( 50.0%)            |
| - 1-Drowsy                         | 2 ( 22.2%)             | 4 ( 57.1%)                   | 6 ( 37.5%)            |
| - 3-Coma                           | 1 ( 11.1%)             | 1 ( 14.3%)                   | 2 ( 12.5%)            |
| Level of consciousness - questions |                        |                              |                       |
| - 0-Answers both correctly         | 3 ( 33.3%)             | 2 ( 28.6%)                   | 5 ( 31.3%)            |
| - 1-Answers one correctly          | 1 ( 11.1%)             | 2 ( 28.6%)                   | 3 ( 18.8%)            |
| - 2-Incorrect                      | 5 ( 55.6%)             | 3 ( 42.9%)                   | 8 ( 50.0%)            |
| Level of consciousness - commands  |                        |                              |                       |
| - 0-Obeys both correctly           | 4 ( 44.4%)             | 4 ( 57.1%)                   | 8 ( 50.0%)            |
| - 1-Obeys one correctly            | 2 ( 22.2%)             | 2 ( 28.6%)                   | 4 ( 25.0%)            |
| - 2-Incorrect                      | 3 ( 33.3%)             | 1 ( 14.3%)                   | 4 ( 25.0%)            |
| Pupillary response                 |                        |                              |                       |
| - 0-Both reactive                  | 9 (100.0%)             | 7 (100.0%)                   | 16 (100.0%)           |
| Best gaze                          |                        |                              |                       |
| - 0-Normal                         | 9 (100.0%)             | 6 ( 85.7%)                   | 15 ( 93.8%)           |
| - 1-Partial gaze palsy             | 0 ( 0.0%)              | 1 ( 14.3%)                   | 1 ( 6.3%)             |
| Best visual                        |                        |                              |                       |
| - 0-No visual loss                 | 9 (100.0%)             | 7 (100.0%)                   | 16 (100.0%)           |
| Facial palsy                       |                        |                              |                       |
| - 0-Normal                         | 6 ( 66.7%)             | 7 (100.0%)                   | 13 ( 81.3%)           |
| - 1-Minor                          | 2 ( 22.2%)             | 0 ( 0.0%)                    | 2 ( 12.5%)            |
| - 2-Partial                        | 1 ( 11.1%)             | 0 ( 0.0%)                    | 1 ( 6.3%)             |
| Best motor - arm                   |                        |                              |                       |
| - 0-No drift                       | 7 ( 77.8%)             | 6 ( 85.7%)                   | 13 ( 81.3%)           |
| - 1-Drift                          | 1 ( 11.1%)             | 0 ( 0.0%)                    | 1 ( 6.3%)             |
| - 3-No effort against gravity      | 1 ( 11.1%)             | 1 ( 14.3%)                   | 2 ( 12.5%)            |
| Best motor - leg                   |                        |                              |                       |
| - 0-No drift                       | 8 ( 88.9%)             | 6 ( 85.7%)                   | 14 ( 87.5%)           |
| - 3-No effort against gravity      | 1 ( 11.1%)             | 1 ( 14.3%)                   | 2 ( 12.5%)            |
| Plantar reflex                     |                        |                              |                       |
| - 0-Normal                         | 9 (100.0%)             | 7 (100.0%)                   | 16 (100.0%)           |
| Limb ataxia                        |                        |                              |                       |
| - 0-Absent                         | 7 ( 77.8%)             | 6 ( 85.7%)                   | 13 ( 81.3%)           |
| - 1-Present in arm or leg          | 2 ( 22.2%)             | 1 ( 14.3%)                   | 3 ( 18.8%)            |
| Sensory                            |                        |                              |                       |
| - 0-Normal                         | 9 (100.0%)             | 6 ( 85.7%)                   | 15 ( 93.8%)           |
| - 1-Partial loss                   | 0 ( 0.0%)              | 1 ( 14.3%)                   | 1 ( 6.3%)             |
| Neglect                            |                        |                              |                       |
| - 0-No neglect                     | 9 (100.0%)             | 6 ( 85.7%)                   | 15 ( 93.8%)           |
| - 1-Partial neglect                | 0 ( 0.0%)              | 1 ( 14.3%)                   | 1 ( 6.3%)             |

|                                  | <b>Placebo<br/>N=9</b> | <b>Dexamethasone<br/>N=7</b> | <b>Total<br/>N=16</b> |
|----------------------------------|------------------------|------------------------------|-----------------------|
| Dysarthria                       |                        |                              |                       |
| - 0-Normal articulation          | 5 ( 55.6%)             | 4 ( 57.1%)                   | 9 ( 56.3%)            |
| - 1-Mild to moderate dysarthria  | 3 ( 33.3%)             | 2 ( 28.6%)                   | 5 ( 31.3%)            |
| - 2-Near unintelligible or worse | 1 ( 11.1%)             | 1 ( 14.3%)                   | 2 ( 12.5%)            |
| Best language                    |                        |                              |                       |
| - 0-No aphasia                   | 2 ( 22.2%)             | 1 ( 14.3%)                   | 3 ( 18.8%)            |
| - 1-Mild to moderate aphasia     | 3 ( 33.3%)             | 3 ( 42.9%)                   | 6 ( 37.5%)            |
| - 2-Severe aphasia               | 3 ( 33.3%)             | 2 ( 28.6%)                   | 5 ( 31.3%)            |
| - 3-Mute                         | 1 ( 11.1%)             | 1 ( 14.3%)                   | 2 ( 12.5%)            |
| NIH Total                        |                        |                              |                       |
| - N                              | 9                      | 7                            | 16                    |
| - Mean +/- SD                    | 6.0 +/-5.8             | 6.1 +/-5.4                   | 6.1 +/-5.4            |
| - Median                         | 6.0                    | 5.0                          | 5.5                   |
| - p25, p75                       | 2.0, 8.0               | 1.0, 8.0                     | 1.5, 8.0              |
| - Min, Max                       | 0.0, 19.0              | 1.0, 17.0                    | 0.0, 19.0             |
| - Missing                        | 0                      | 0                            | 0                     |

**Table 10.3.26: Mini-Mental test day 0 (PP set)**

|                              | <b>Placebo<br/>N=9</b> | <b>Dexamethasone<br/>N=7</b> | <b>Total<br/>N=16</b> |
|------------------------------|------------------------|------------------------------|-----------------------|
| <b>Orientation</b>           |                        |                              |                       |
| - N                          | 6                      | 3                            | 9                     |
| - Mean +/- SD                | 6.3 +/-4.9             | 6.3 +/-1.5                   | 6.3 +/-4.0            |
| - Median                     | 9.0                    | 6.0                          | 8.0                   |
| - p25, p75                   | 0.0, 10.0              | 5.0, 8.0                     | 5.0, 9.0              |
| - Min, Max                   | 0.0, 10.0              | 5.0, 8.0                     | 0.0, 10.0             |
| - Missing                    | 3                      | 4                            | 7                     |
| <b>Immediate recall</b>      |                        |                              |                       |
| - N                          | 6                      | 3                            | 9                     |
| - Mean +/- SD                | 2.0 +/-1.5             | 2.7 +/-0.6                   | 2.2 +/-1.3            |
| - Median                     | 3.0                    | 3.0                          | 3.0                   |
| - p25, p75                   | 0.0, 3.0               | 2.0, 3.0                     | 2.0, 3.0              |
| - Min, Max                   | 0.0, 3.0               | 2.0, 3.0                     | 0.0, 3.0              |
| - Missing                    | 3                      | 4                            | 7                     |
| <b>Serial 7s total</b>       |                        |                              |                       |
| - N                          | 6                      | 3                            | 9                     |
| - Mean +/- SD                | 2.7 +/-2.3             | 2.3 +/-1.5                   | 2.6 +/-1.9            |
| - Median                     | 2.5                    | 2.0                          | 2.0                   |
| - p25, p75                   | 1.0, 5.0               | 1.0, 4.0                     | 1.0, 4.0              |
| - Min, Max                   | 0.0, 5.0               | 1.0, 4.0                     | 0.0, 5.0              |
| - Missing                    | 3                      | 4                            | 7                     |
| <b>Delayed verbal recall</b> |                        |                              |                       |
| - N                          | 6                      | 3                            | 9                     |
| - Mean +/- SD                | 0.8 +/-1.3             | 0.0 +/-0.0                   | 0.6 +/-1.1            |
| - Median                     | 0.0                    | 0.0                          | 0.0                   |
| - p25, p75                   | 0.0, 2.0               | 0.0, 0.0                     | 0.0, 0.0              |
| - Min, Max                   | 0.0, 3.0               | 0.0, 0.0                     | 0.0, 3.0              |
| - Missing                    | 3                      | 4                            | 7                     |
| <b>Naming</b>                |                        |                              |                       |
| - N                          | 6                      | 3                            | 9                     |
| - Mean +/- SD                | 6.7 +/-3.0             | 7.7 +/-1.5                   | 7.0 +/-2.5            |
| - Median                     | 7.5                    | 8.0                          | 8.0                   |
| - p25, p75                   | 6.0, 9.0               | 6.0, 9.0                     | 6.0, 9.0              |
| - Min, Max                   | 1.0, 9.0               | 6.0, 9.0                     | 1.0, 9.0              |
| - Missing                    | 3                      | 4                            | 7                     |
| <b>Total score</b>           |                        |                              |                       |
| - N                          | 6                      | 3                            | 9                     |
| - Mean +/- SD                | 18.5 +/-11.8           | 19.0 +/-5.0                  | 18.7 +/-9.7           |
| - Median                     | 23.0                   | 19.0                         | 20.0                  |
| - p25, p75                   | 7.0, 28.0              | 14.0, 24.0                   | 14.0, 26.0            |
| - Min, Max                   | 1.0, 29.0              | 14.0, 24.0                   | 1.0, 29.0             |
| - Missing                    | 3                      | 4                            | 7                     |

## 10.4 Primary endpoint

### 10.4.1 Full analysis set

**Table 10.4.1: Binary mRS at scheduled month 6 visit – LOCF (FAS)**

|            | <i>Placebo</i> | <i>Dexamethasone</i> | <i>All</i> | <i>p-value</i> |
|------------|----------------|----------------------|------------|----------------|
| Binary mRS |                |                      |            |                |
| - <=2      | 12 (63.2%)     | 12 (63.2%)           | 24 (63.2%) | 1.0000         |
| - >2       | 7 (36.8%)      | 7 (36.8%)            | 14 (36.8%) |                |

\*p-value of unconditional test is 1.0

There seem to be no differences in the binary mRS outcome scale between Placebo and Dexamethasone group. However, due to the preliminary termination of the trial and the resulting low sample size these results have only descriptive character.

### 10.4.2 Sensitivity analyses

**Table 10.4.2: Binary mRS at scheduled month 6 visit – best case imputation (FAS)**

|            | <i>Placebo</i> | <i>Dexamethasone</i> | <i>All</i> | <i>p-value</i> |
|------------|----------------|----------------------|------------|----------------|
| Binary mRS | .              |                      |            |                |
| - <=2      | 14 (73.7%)     | 15 (78.9%)           | 29 (76.3%) | 0.7028         |
| - >2       | 5 (26.3%)      | 4 (21.1%)            | 9 (23.7%)  |                |

\*p-value of unconditional test is 0.8107

**Table 10.4.3: Binary mRS at scheduled month 6 visit – worst case imputation (FAS)**

|            | <i>Placebo</i> | <i>Dexamethasone</i> | <i>All</i> | <i>p-value</i> |
|------------|----------------|----------------------|------------|----------------|
| Binary mRS |                |                      |            |                |
| - <=2      | 12 (63.2%)     | 10 (52.6%)           | 22 (57.9%) | 0.5111         |
| - >2       | 7 (36.8%)      | 9 (47.4%)            | 16 (42.1%) |                |

\*p-value of unconditional test is 0.5923

**Table 10.4.4: Binary mRS at month 6 (PP set)**

|            | <i>Placebo</i> | <i>Dexamethasone</i> | <i>All</i>  | <i>p-value</i> |
|------------|----------------|----------------------|-------------|----------------|
| Binary mRS |                |                      |             |                |
| - <=2      | 7 ( 77.8%)     | 4 ( 57.1%)           | 11 ( 68.8%) | 0.3770*        |
| - >2       | 2 ( 22.2%)     | 3 ( 42.9%)           | 5 ( 31.3%)  |                |

\*p-value of unconditional test is 0.5622

**Table 10.4.5: Binary mRS at month 6 +/- 14 days – LOCF imputation (FAS)**

|            | <i>Placebo</i> | <i>Dexamethasone</i> | <i>All</i>  | <i>p-value</i> |
|------------|----------------|----------------------|-------------|----------------|
| Binary mRS |                |                      |             |                |
| - <=2      | 10 ( 52.6%)    | 10 ( 52.6%)          | 20 ( 52.6%) | 1.0000*        |
| - >2       | 9 ( 47.4%)     | 9 ( 47.4%)           | 18 ( 47.4%) |                |

\*p-value of unconditional test is 1.0

All sensitivity analyses confirm the results of the primary analysis.

## 10.5 Secondary endpoints

### 10.5.1 Mortality

#### 10.5.1.1 FAS

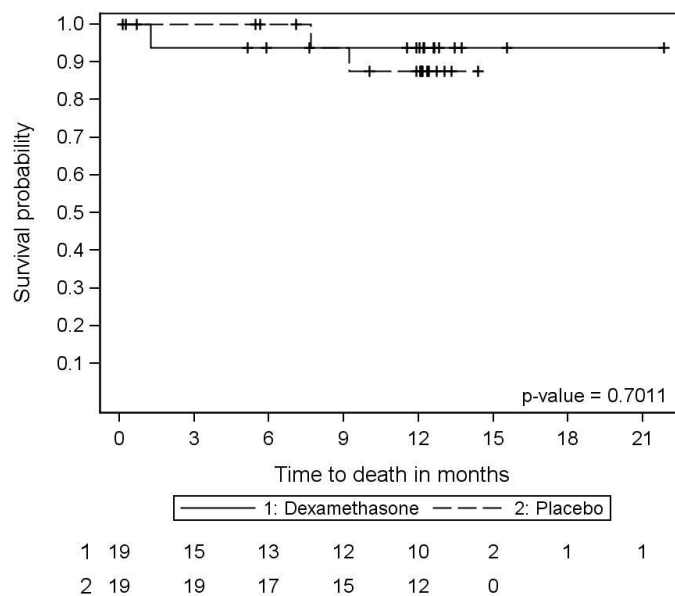

Figure 10.5.1: Kaplan-Meier estimate for survival probability and p-value of log-rank test (FAS). Numbers below the plot correspond to patients at risk.

Table 10.5.1: Mortality at month 6 (Chi<sup>2</sup>-test) (FAS)

|           | Placebo     | Dexamethasone | All        | p-value |
|-----------|-------------|---------------|------------|---------|
| - Alive   | 18 (100.0%) | 14 (93.3%)    | 32 (97.0%) | 0.2660  |
| - Dead    | 0 (0.0%)    | 1 (6.7%)      | 1 (3.0%)   |         |
| - Missing | 1           | 4             | 5          |         |

Table 10.5.2: Mortality at month 12 (Chi<sup>2</sup>-test) (FAS)

|           | Placebo    | Dexamethasone | All        | p-value |
|-----------|------------|---------------|------------|---------|
| - Alive   | 13 (86.7%) | 11 (91.7%)    | 24 (88.9%) | 0.6812  |
| - Dead    | 2 (13.3%)  | 1 (8.3%)      | 3 (11.1%)  |         |
| - Missing | 4          | 7             | 11         |         |

### 10.5.1.2 PP set

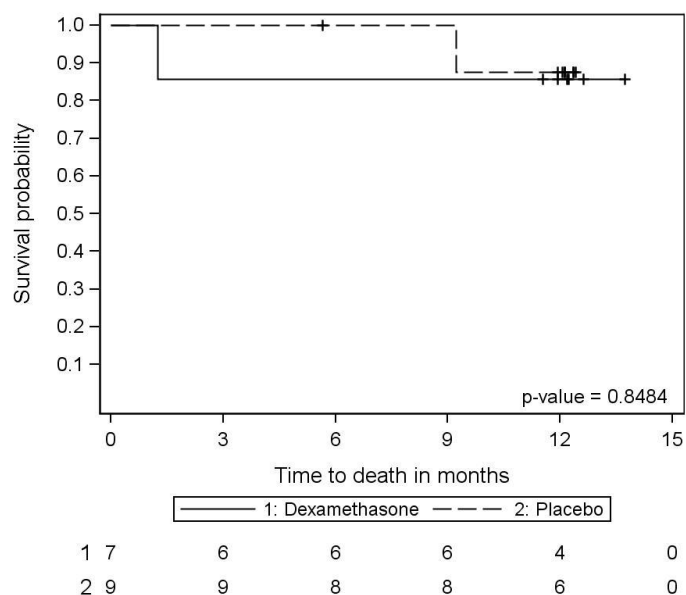

Figure 10.5.2: Kaplan-Meier estimate for survival probability and p-value of log-rank test (PP set). Numbers below the plot correspond to patients at risk.

Table 10.5.3: Mortality at month 6 (Chi<sup>2</sup>-test) (PP set)

|           | Placebo    | Dexamethasone | All        | p-value |
|-----------|------------|---------------|------------|---------|
| - Alive   | 9 (100.0%) | 6 (85.7%)     | 15 (93.8%) | 0.2416  |
| - Dead    | 0 (0.0%)   | 1 (14.3%)     | 1 (6.3%)   |         |
| - Missing | 0          | 0             | 0          |         |

Table 10.5.4: Mortality at month 12 (Chi<sup>2</sup>-test) (PP set)

|           | Placebo   | Dexamethasone | All        | p-value |
|-----------|-----------|---------------|------------|---------|
| - Alive   | 7 (87.5%) | 5 (83.3%)     | 12 (85.7%) | 0.8255  |
| - Dead    | 1 (12.5%) | 1 (16.7%)     | 2 (14.3%)  |         |
| - Missing | 1         | 1             | 2          |         |

## 10.5.2 Glasgow outcome scale: GOS

### 10.5.2.1 FAS

**Table 10.5.5: Glasgow outcome scale (FAS)**

|                                 | Placebo<br>N=19 | Dexamethasone<br>N=19 | Total<br>N=38 | p-value              |
|---------------------------------|-----------------|-----------------------|---------------|----------------------|
| Discharge/Day 30 GOS*           |                 |                       |               |                      |
| - 2-Persistent vegetative state | 0 ( 0.0%)       | 1 ( 5.9%)             | 1 ( 2.9%)     | 0.426 * <sup>1</sup> |
| - 3-Severe disability           | 9 ( 50.0%)      | 5 ( 29.4%)            | 14 ( 40.0%)   |                      |
| - 4-Moderate disability         | 7 ( 38.9%)      | 7 ( 41.2%)            | 14 ( 40.0%)   |                      |
| - 5-Good recovery               | 2 ( 11.1%)      | 4 ( 23.5%)            | 6 ( 17.1%)    |                      |
| - Missing                       | 1               | 2                     | 3             |                      |
| 6 Months GOS                    |                 |                       |               |                      |
| - 3-Severe disability           | 3 ( 17.6%)      | 1 ( 7.7%)             | 4 ( 13.3%)    | 0.460 * <sup>1</sup> |
| - 4-Moderate disability         | 6 ( 35.3%)      | 3 ( 23.1%)            | 9 ( 30.0%)    |                      |
| - 5-Good recovery               | 8 ( 47.1%)      | 9 ( 69.2%)            | 17 ( 56.7%)   |                      |
| - Missing                       | 2               | 6                     | 8             |                      |
| 12 Months GOS                   |                 |                       |               |                      |
| - 3-Severe disability           | 2 ( 14.3%)      | 2 ( 16.7%)            | 4 ( 15.4%)    | 0.773 * <sup>1</sup> |
| - 4-Moderate disability         | 4 ( 28.6%)      | 2 ( 16.7%)            | 6 ( 23.1%)    |                      |
| - 5-Good recovery               | 8 ( 57.1%)      | 8 ( 66.7%)            | 16 ( 61.5%)   |                      |
| - Missing                       | 5               | 7                     | 12            |                      |

\* = no secondary endpoint, \*<sup>1</sup> = Chi<sup>2</sup>-test, two-sided

### 10.5.2.2 PP set

**Table 10.5.6: Glasgow outcome scale (PP set)**

|                         | Placebo<br>N=9 | Dexamethasone<br>N=7 | Total<br>N=16 | p-value              |
|-------------------------|----------------|----------------------|---------------|----------------------|
| Discharge/Day 30 GOS    |                |                      |               |                      |
| - 3-Severe disability   | 2 ( 25.0%)     | 2 ( 40.0%)           | 4 ( 30.8%)    | 0.465 * <sup>1</sup> |
| - 4-Moderate disability | 4 ( 50.0%)     | 3 ( 60.0%)           | 7 ( 53.8%)    |                      |
| - 5-Good recovery       | 2 ( 25.0%)     | 0 ( 0.0%)            | 2 ( 15.4%)    |                      |
| - Missing               | 1              | 2                    | 3             |                      |
| 6 Months GOS            |                |                      |               |                      |
| - 3-Severe disability   | 1 ( 11.1%)     | 0 ( 0.0%)            | 1 ( 6.7%)     | 0.446 * <sup>1</sup> |
| - 4-Moderate disability | 1 ( 11.1%)     | 2 ( 33.3%)           | 3 ( 20.0%)    |                      |
| - 5-Good recovery       | 7 ( 77.8%)     | 4 ( 66.7%)           | 11 ( 73.3%)   |                      |
| - Missing               | 0              | 1                    | 1             |                      |
| 12 Months GOS           |                |                      |               |                      |
| - 4-Moderate disability | 2 ( 28.6%)     | 2 ( 33.3%)           | 4 ( 30.8%)    | 0.853 * <sup>1</sup> |
| - 5-Good recovery       | 5 ( 71.4%)     | 4 ( 66.7%)           | 9 ( 69.2%)    |                      |
| - Missing               | 2              | 1                    | 3             |                      |

\*<sup>1</sup> = Chi<sup>2</sup>-test, two-sided



## 10.5.3 Quality of life (EuroQol 5D)

### 10.5.3.1 FAS

Table 10.5.7: EQ-5D month 6 (FAS)

|                                                  | Placebo<br>N=19 | Dexamethasone<br>N=19 | Total<br>N=38 | p-value             |
|--------------------------------------------------|-----------------|-----------------------|---------------|---------------------|
| <b>Mobility</b>                                  |                 |                       |               |                     |
| - no problems in walking about                   | 11 (100.0%)     | 6 (75.0%)             | 17 (89.5%)    | 0.080 <sup>*1</sup> |
| - some problems in walking about                 | 0 (0.0%)        | 2 (25.0%)             | 2 (10.5%)     |                     |
| - Missing                                        | 8               | 11                    | 19            |                     |
| <b>Self-care</b>                                 |                 |                       |               |                     |
| - no problems with self-care                     | 11 (100.0%)     | 6 (75.0%)             | 17 (89.5%)    | 0.080 <sup>*1</sup> |
| - some problems washing and dressing             | 0 (0.0%)        | 2 (25.0%)             | 2 (10.5%)     |                     |
| - Missing                                        | 8               | 11                    | 19            |                     |
| <b>Usual activities</b>                          |                 |                       |               |                     |
| - no problems with performing usual activities   | 4 (36.4%)       | 4 (50.0%)             | 8 (42.1%)     | 0.336 <sup>*1</sup> |
| - some problems with performing usual activities | 7 (63.6%)       | 3 (37.5%)             | 10 (52.6%)    |                     |
| - unable to perform usual activities             | 0 (0.0%)        | 1 (12.5%)             | 1 (5.3%)      |                     |
| - Missing                                        | 8               | 11                    | 19            |                     |
| <b>Pain/discomfort</b>                           |                 |                       |               |                     |
| - no pain or discomfort                          | 10 (90.9%)      | 5 (62.5%)             | 15 (78.9%)    | 0.134 <sup>*1</sup> |
| - moderate pain or discomfort                    | 1 (9.1%)        | 3 (37.5%)             | 4 (21.1%)     |                     |
| - Missing                                        | 8               | 11                    | 19            |                     |
| <b>Anxiety/depression</b>                        |                 |                       |               |                     |
| - not anxious or depressed                       | 8 (72.7%)       | 4 (50.0%)             | 12 (63.2%)    | 0.385 <sup>*1</sup> |
| - moderately anxious or depressed                | 3 (27.3%)       | 3 (37.5%)             | 6 (31.6%)     |                     |
| - extremely anxious or depressed                 | 0 (0.0%)        | 1 (12.5%)             | 1 (5.3%)      |                     |
| - Missing                                        | 8               | 11                    | 19            |                     |
| <b>EQ-5D Index</b>                               |                 |                       |               |                     |
| - N                                              | 11              | 8                     | 19            | 0.243 <sup>*2</sup> |
| - Mean +/- SD                                    | 1.0 +/-0.0      | 0.8 +/-0.2            | 0.9 +/-0.2    |                     |
| - Median                                         | 1.0             | 0.9                   | 1.0           |                     |
| - p25, p75                                       | 1.0, 1.0        | 0.7, 1.0              | 0.9, 1.0      |                     |
| - Min, Max                                       | 0.9, 1.0        | 0.4, 1.0              | 0.4, 1.0      |                     |
| - Missing                                        | 8               | 11                    | 19            |                     |
| <b>EQ-5D VAS</b>                                 |                 |                       |               |                     |
| - N                                              | 11              | 8                     | 19            | 0.184 <sup>*2</sup> |
| - Mean +/- SD                                    | 71.3 +/-12.7    | 62.0 +/-14.1          | 67.4 +/-13.7  |                     |
| - Median                                         | 75.0            | 58.0                  | 70.0          |                     |
| - p25, p75                                       | 60.0, 80.0      | 55.0, 72.5            | 55.0, 79.0    |                     |
| - Min, Max                                       | 50.0, 85.0      | 40.0, 85.0            | 40.0, 85.0    |                     |
| - Missing                                        | 8               | 11                    | 19            |                     |

<sup>\*1</sup> = Chi<sup>2</sup>-test, two-sided, <sup>\*2</sup> = U-test, two-sided

**Table 10.5.8: EQ-5D month 12 (FAS)**

|                                                  | Placebo<br>N=19 | Dexamethasone<br>N=19 | Total<br>N=38 | p-value              |
|--------------------------------------------------|-----------------|-----------------------|---------------|----------------------|
| <b>Mobility</b>                                  |                 |                       |               |                      |
| - no problems in walking about                   | 7 ( 87.5%)      | 5 ( 71.4%)            | 12 ( 80.0%)   | 0.529 * <sup>1</sup> |
| - some problems in walking about                 | 1 ( 12.5%)      | 1 ( 14.3%)            | 2 ( 13.3%)    |                      |
| - confined to bed                                | 0 ( 0.0%)       | 1 ( 14.3%)            | 1 ( 6.7%)     |                      |
| - Missing                                        | 11              | 12                    | 23            |                      |
| <b>Self-care</b>                                 |                 |                       |               |                      |
| - no problems with self-care                     | 8 (100.0%)      | 6 ( 85.7%)            | 14 ( 93.3%)   | 0.268 * <sup>1</sup> |
| - unable to wash and dress                       | 0 ( 0.0%)       | 1 ( 14.3%)            | 1 ( 6.7%)     |                      |
| - Missing                                        | 11              | 12                    | 23            |                      |
| <b>Usual activities</b>                          |                 |                       |               |                      |
| - no problems with performing usual activities   | 4 ( 50.0%)      | 4 ( 57.1%)            | 8 ( 53.3%)    | 0.782 * <sup>1</sup> |
| - some problems with performing usual activities | 4 ( 50.0%)      | 3 ( 42.9%)            | 7 ( 46.7%)    |                      |
| - Missing                                        | 11              | 12                    | 23            |                      |
| <b>Pain/discomfort</b>                           |                 |                       |               |                      |
| - no pain or discomfort                          | 6 ( 75.0%)      | 4 ( 57.1%)            | 10 ( 66.7%)   | 0.464 * <sup>1</sup> |
| - moderate pain or discomfort                    | 2 ( 25.0%)      | 3 ( 42.9%)            | 5 ( 33.3%)    |                      |
| - Missing                                        | 11              | 12                    | 23            |                      |
| <b>Anxiety/depression</b>                        |                 |                       |               |                      |
| - not anxious or depressed                       | 5 ( 62.5%)      | 5 ( 71.4%)            | 10 ( 66.7%)   | 0.875 * <sup>1</sup> |
| - moderately anxious or depressed                | 2 ( 25.0%)      | 1 ( 14.3%)            | 3 ( 20.0%)    |                      |
| - extremely anxious or depressed                 | 1 ( 12.5%)      | 1 ( 14.3%)            | 2 ( 13.3%)    |                      |
| - Missing                                        | 11              | 12                    | 23            |                      |
| <b>EQ-5D Index</b>                               |                 |                       |               |                      |
| - N                                              | 8               | 7                     | 15            | 0.812 * <sup>2</sup> |
| - Mean +/- SD                                    | 0.9 +/-0.2      | 0.8 +/-0.4            | 0.8 +/-0.3    |                      |
| - Median                                         | 1.0             | 0.9                   | 1.0           |                      |
| - p25, p75                                       | 0.9, 1.0        | 0.5, 1.0              | 0.9, 1.0      |                      |
| - Min, Max                                       | 0.5, 1.0        | 0.1, 1.0              | 0.1, 1.0      |                      |
| - Missing                                        | 11              | 12                    | 23            |                      |
| <b>EQ-5D VAS</b>                                 |                 |                       |               |                      |
| - N                                              | 8               | 7                     | 15            | 0.296 * <sup>2</sup> |
| - Mean +/- SD                                    | 64.1 +/-20.0    | 74.9 +/-18.4          | 69.1 +/-19.4  |                      |
| - Median                                         | 64.0            | 80.0                  | 70.0          |                      |
| - p25, p75                                       | 45.0, 82.5      | 55.0, 90.0            | 50.0, 86.0    |                      |
| - Min, Max                                       | 40.0, 90.0      | 50.0, 98.0            | 40.0, 98.0    |                      |
| - Missing                                        | 11              | 12                    | 23            |                      |

\*<sup>1</sup> = Chi<sup>2</sup>-test, two-sided, \*<sup>2</sup> = U-test, two-sided

### 10.5.3.2 PP set

**Table 10.5.9: EQ-5D month 6 (PP set)**

|                                                  | Placebo<br>N=9 | Dexamethasone<br>N=7 | Total<br>N=16 | p-value              |
|--------------------------------------------------|----------------|----------------------|---------------|----------------------|
| <b>Mobility</b>                                  |                |                      |               |                      |
| - no problems in walking about                   | 6 (100.0%)     | 2 ( 66.7%)           | 8 ( 88.9%)    | 0.134 * <sup>1</sup> |
| - some problems in walking about                 | 0 ( 0.0%)      | 1 ( 33.3%)           | 1 ( 11.1%)    |                      |
| - Missing                                        | 3              | 4                    | 7             |                      |
| <b>Self-care</b>                                 |                |                      |               |                      |
| - no problems with self-care                     | 6 (100.0%)     | 2 ( 66.7%)           | 8 ( 88.9%)    | 0.134 * <sup>1</sup> |
| - some problems washing and dressing             | 0 ( 0.0%)      | 1 ( 33.3%)           | 1 ( 11.1%)    |                      |
| - Missing                                        | 3              | 4                    | 7             |                      |
| <b>Usual activities</b>                          |                |                      |               |                      |
| - no problems with performing usual activities   | 3 ( 50.0%)     | 1 ( 33.3%)           | 4 ( 44.4%)    | 0.325 * <sup>1</sup> |
| - some problems with performing usual activities | 3 ( 50.0%)     | 1 ( 33.3%)           | 4 ( 44.4%)    |                      |
| - unable to perform usual activities             | 0 ( 0.0%)      | 1 ( 33.3%)           | 1 ( 11.1%)    |                      |
| - Missing                                        | 3              | 4                    | 7             |                      |
| <b>Pain/discomfort</b>                           |                |                      |               |                      |
| - no pain or discomfort                          | 5 ( 83.3%)     | 1 ( 33.3%)           | 6 ( 66.7%)    | 0.134 * <sup>1</sup> |
| - moderate pain or discomfort                    | 1 ( 16.7%)     | 2 ( 66.7%)           | 3 ( 33.3%)    |                      |
| - Missing                                        | 3              | 4                    | 7             |                      |
| <b>Anxiety/depression</b>                        |                |                      |               |                      |
| - not anxious or depressed                       | 4 ( 66.7%)     | 1 ( 33.3%)           | 5 ( 55.6%)    | 0.343 * <sup>1</sup> |
| - moderately anxious or depressed                | 2 ( 33.3%)     | 2 ( 66.7%)           | 4 ( 44.4%)    |                      |
| - Missing                                        | 3              | 4                    | 7             |                      |
| <b>EQ-5D Index</b>                               |                |                      |               |                      |
| - N                                              | 6              | 3                    | 9             | 0.044 * <sup>2</sup> |
| - Mean +/- SD                                    | 1.0 +/-0.0     | 0.8 +/-0.2           | 0.9 +/-0.2    |                      |
| - Median                                         | 1.0            | 0.9                  | 1.0           |                      |
| - p25, p75                                       | 1.0, 1.0       | 0.5, 0.9             | 0.9, 1.0      |                      |
| - Min, Max                                       | 0.9, 1.0       | 0.5, 0.9             | 0.5, 1.0      |                      |
| - Missing                                        | 3              | 4                    | 7             |                      |
| <b>EQ-5D VAS</b>                                 |                |                      |               |                      |
| - N                                              | 6              | 3                    | 9             | 0.193 * <sup>2</sup> |
| - Mean +/- SD                                    | 72.8 +/-14.5   | 57.0 +/-2.6          | 67.6 +/-14.0  |                      |
| - Median                                         | 78.5           | 56.0                 | 60.0          |                      |
| - p25, p75                                       | 60.0, 85.0     | 55.0, 60.0           | 56.0, 80.0    |                      |
| - Min, Max                                       | 50.0, 85.0     | 55.0, 60.0           | 50.0, 85.0    |                      |
| - Missing                                        | 3              | 4                    | 7             |                      |

\*<sup>1</sup> = Chi<sup>2</sup>-test, two-sided, \*<sup>2</sup> = U-test, two-sided

**Table 10.5.10: EQ-5D month 12 (PP set)**

|                                                  | Placebo<br>N=9 | Dexamethasone<br>N=7 | Total<br>N=16 | p-value              |
|--------------------------------------------------|----------------|----------------------|---------------|----------------------|
| <b>Mobility</b>                                  |                |                      |               |                      |
| - no problems in walking about                   | 4 (100.0%)     | 2 (100.0%)           | 6 (100.0%)    |                      |
| - Missing                                        | 5              | 5                    | 10            |                      |
| <b>Self-care</b>                                 |                |                      |               |                      |
| - no problems with self-care                     | 4 (100.0%)     | 2 (100.0%)           | 6 (100.0%)    |                      |
| - Missing                                        | 5              | 5                    | 10            |                      |
| <b>Usual activities</b>                          |                |                      |               |                      |
| - no problems with performing usual activities   | 2 ( 50.0%)     | 2 (100.0%)           | 4 ( 66.7%)    | 0.221 * <sup>1</sup> |
| - some problems with performing usual activities | 2 ( 50.0%)     | 0 ( 0.0%)            | 2 ( 33.3%)    |                      |
| - Missing                                        | 5              | 5                    | 10            |                      |
| <b>Pain/discomfort</b>                           |                |                      |               |                      |
| - no pain or discomfort                          | 3 ( 75.0%)     | 1 ( 50.0%)           | 4 ( 66.7%)    | 0.540 * <sup>1</sup> |
| - moderate pain or discomfort                    | 1 ( 25.0%)     | 1 ( 50.0%)           | 2 ( 33.3%)    |                      |
| - Missing                                        | 5              | 5                    | 10            |                      |
| <b>Anxiety/depression</b>                        |                |                      |               |                      |
| - not anxious or depressed                       | 2 ( 50.0%)     | 2 (100.0%)           | 4 ( 66.7%)    | 0.472 * <sup>1</sup> |
| - moderately anxious or depressed                | 1 ( 25.0%)     | 0 ( 0.0%)            | 1 ( 16.7%)    |                      |
| - extremely anxious or depressed                 | 1 ( 25.0%)     | 0 ( 0.0%)            | 1 ( 16.7%)    |                      |
| - Missing                                        | 5              | 5                    | 10            |                      |
| <b>EQ-5D Index</b>                               |                |                      |               |                      |
| - N                                              | 4              | 2                    | 6             | 1.000 * <sup>2</sup> |
| - Mean +/- SD                                    | 0.9 +/-0.3     | 0.9 +/-0.1           | 0.9 +/-0.2    |                      |
| - Median                                         | 1.0            | 0.9                  | 1.0           |                      |
| - p25, p75                                       | 0.7, 1.0       | 0.9, 1.0             | 0.9, 1.0      |                      |
| - Min, Max                                       | 0.5, 1.0       | 0.9, 1.0             | 0.5, 1.0      |                      |
| - Missing                                        | 5              | 5                    | 10            |                      |
| <b>EQ-5D VAS</b>                                 |                |                      |               |                      |
| - N                                              | 4              | 2                    | 6             | 0.159 * <sup>2</sup> |
| - Mean +/- SD                                    | 70.0 +/-21.6   | 94.0 +/-5.7          | 78.0 +/-21.0  |                      |
| - Median                                         | 75.0           | 94.0                 | 85.0          |                      |
| - p25, p75                                       | 55.0, 85.0     | 90.0, 98.0           | 70.0, 90.0    |                      |
| - Min, Max                                       | 40.0, 90.0     | 90.0, 98.0           | 40.0, 98.0    |                      |
| - Missing                                        | 5              | 5                    | 10            |                      |

\*<sup>1</sup> = Chi<sup>2</sup>-test, two-sided, \*<sup>2</sup> = U-test, two-sided

## 10.5.4 Functional outcome (mRS)

### 10.5.4.1 FAS

**Table 10.5.11: mRS at scheduled visit times (FAS)**

|                       | Placebo    | Dexamethasone | All        | p-value |
|-----------------------|------------|---------------|------------|---------|
| Pre-encephalitis mRS* |            |               |            |         |
| - 0                   | 17 (89.5%) | 14 (73.7%)    | 31 (81.6%) | 0.0991  |
| - 1                   | 0 (0.0%)   | 4 (21.1%)     | 4 (10.5%)  |         |
| - 2                   | 2 (10.5%)  | 1 (5.3%)      | 3 (7.9%)   |         |
| - 3                   | 0 (0.0%)   | 0 (0.0%)      | 0 (0.0%)   |         |
| - 4                   | 0 (0.0%)   | 0 (0.0%)      | 0 (0.0%)   |         |
| - 5                   | 0 (0.0%)   | 0 (0.0%)      | 0 (0.0%)   |         |
| - 6                   | 0 (0.0%)   | 0 (0.0%)      | 0 (0.0%)   |         |
| - Missing             | 0          | 0             | 0          |         |
| mRS – discharge*      |            |               |            |         |
| - 0                   | 2 (11.1%)  | 2 (11.8%)     | 4 (11.4%)  | 0.4716  |
| - 1                   | 0 (0.0%)   | 2 (11.8%)     | 2 (5.7%)   |         |
| - 2                   | 3 (16.7%)  | 4 (23.5%)     | 7 (20.0%)  |         |
| - 3                   | 8 (44.4%)  | 4 (23.5%)     | 12 (34.3%) |         |
| - 4                   | 1 (5.6%)   | 0 (0.0%)      | 1 (2.9%)   |         |
| - 5                   | 4 (22.2%)  | 5 (29.4%)     | 9 (25.7%)  |         |
| - 6                   | 0 (0.0%)   | 0 (0.0%)      | 0 (0.0%)   |         |
| - Missing             | 1          | 2             | 3          |         |
| mRS - month 6         |            |               |            |         |
| - 0                   | 0 (0.0%)   | 3 (21.4%)     | 3 (9.7%)   | 0.2106  |
| - 1                   | 4 (23.5%)  | 4 (28.6%)     | 8 (25.8%)  |         |
| - 2                   | 8 (47.1%)  | 3 (21.4%)     | 11 (35.5%) |         |
| - 3                   | 2 (11.8%)  | 1 (7.1%)      | 3 (9.7%)   |         |
| - 4                   | 0 (0.0%)   | 1 (7.1%)      | 1 (3.2%)   |         |
| - 5                   | 3 (17.6%)  | 1 (7.1%)      | 4 (12.9%)  |         |
| - 6                   | 0 (0.0%)   | 1 (7.1%)      | 1 (3.2%)   |         |
| - Missing             | 2          | 5             | 7          |         |
| mRS - month 12        |            |               |            |         |
| - 0                   | 2 (12.5%)  | 5 (38.5%)     | 7 (24.1%)  | 0.2712  |
| - 1                   | 2 (12.5%)  | 2 (15.4%)     | 4 (13.8%)  |         |
| - 2                   | 5 (31.3%)  | 0 (0.0%)      | 5 (17.2%)  |         |
| - 3                   | 3 (18.8%)  | 3 (23.1%)     | 6 (20.7%)  |         |
| - 4                   | 0 (0.0%)   | 0 (0.0%)      | 0 (0.0%)   |         |
| - 5                   | 2 (12.5%)  | 2 (15.4%)     | 4 (13.8%)  |         |
| - 6                   | 2 (12.5%)  | 1 (7.7%)      | 3 (10.3%)  |         |
| - Missing             | 3          | 6             | 9          |         |

\*No secondary endpoint

**Table 10.5.12: Binary mRS at scheduled visit month 12 (FAS)**

|                     | Placebo   | Dexamethasone | All        | p-value |
|---------------------|-----------|---------------|------------|---------|
| binary mRS month 12 |           |               |            |         |
| - <=2               | 9 (56.3%) | 7 (53.8%)     | 16 (55.2%) | 0.8970  |
| - >2                | 7 (43.8%) | 6 (46.2%)     | 13 (44.8%) |         |
| - Missing           | 3         | 6             | 9          |         |

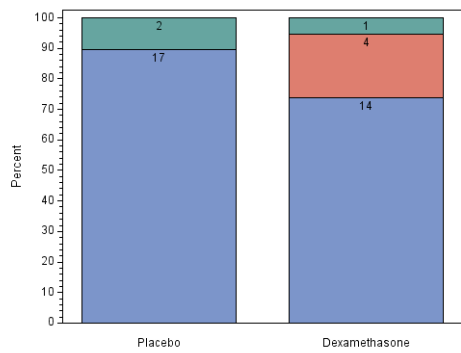

Pre-encephalitis

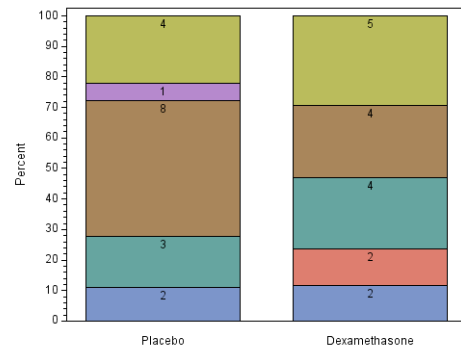

At discharge / day 30

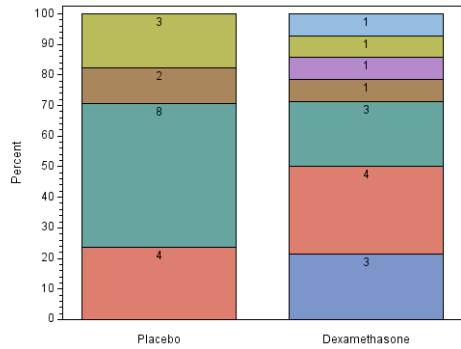

Scheduled month 6

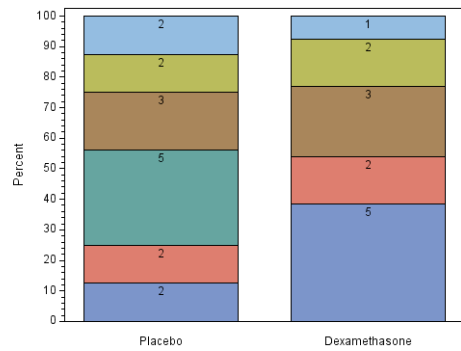

Scheduled month 12

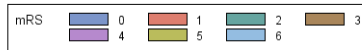

Figure 10.5.3: Stacked bar plots mRS (FAS).

### 10.5.4.2 PP set

**Table 10.5.13: mRS at scheduled visit times (PP set)**

|                       | Placebo   | Dexamethasone | All        | p-value |
|-----------------------|-----------|---------------|------------|---------|
| Pre-encephalitis mRS* |           |               |            |         |
| - 0                   | 8 (88.9%) | 6 (85.7%)     | 14 (87.5%) | 0.3556  |
| - 1                   | 0 (0.0%)  | 1 (14.3%)     | 1 (6.3%)   |         |
| - 2                   | 1 (11.1%) | 0 (0.0%)      | 1 (6.3%)   |         |
| - 3                   | 0 (0.0%)  | 0 (0.0%)      | 0 (0.0%)   |         |
| - 4                   | 0 (0.0%)  | 0 (0.0%)      | 0 (0.0%)   |         |
| - 5                   | 0 (0.0%)  | 0 (0.0%)      | 0 (0.0%)   |         |
| - 6                   | 0 (0.0%)  | 0 (0.0%)      | 0 (0.0%)   |         |
| - Missing             | 0         | 0             | 0          |         |
| mRS - discharge       |           |               |            |         |
| - 0                   | 2 (25.0%) | 0 (0.0%)      | 2 (15.4%)  | 0.5577  |
| - 1                   | 0 (0.0%)  | 0 (0.0%)      | 0 (0.0%)   |         |
| - 2                   | 1 (12.5%) | 1 (20.0%)     | 2 (15.4%)  |         |
| - 3                   | 3 (37.5%) | 2 (40.0%)     | 5 (38.5%)  |         |
| - 4                   | 1 (12.5%) | 0 (0.0%)      | 1 (7.7%)   |         |
| - 5                   | 1 (12.5%) | 2 (40.0%)     | 3 (23.1%)  |         |
| - 6                   | 0 (0.0%)  | 0 (0.0%)      | 0 (0.0%)   |         |
| - Missing             | 1         | 2             | 3          |         |
| mRS - month 6         |           |               |            |         |
| - 0                   | 0 (0.0%)  | 1 (14.3%)     | 1 (6.3%)   | 0.3677  |
| - 1                   | 2 (22.2%) | 2 (28.6%)     | 4 (25.0%)  |         |
| - 2                   | 5 (55.6%) | 1 (14.3%)     | 6 (37.5%)  |         |
| - 3                   | 1 (11.1%) | 1 (14.3%)     | 2 (12.5%)  |         |
| - 4                   | 0 (0.0%)  | 1 (14.3%)     | 1 (6.3%)   |         |
| - 5                   | 1 (11.1%) | 0 (0.0%)      | 1 (6.3%)   |         |
| - 6                   | 0 (0.0%)  | 1 (14.3%)     | 1 (6.3%)   |         |
| - Missing             | 0         | 0             | 0          |         |
| mRS - month 12        |           |               |            |         |
| - 0                   | 1 (12.5%) | 2 (28.6%)     | 3 (20.0%)  | 0.5897  |
| - 1                   | 2 (25.0%) | 1 (14.3%)     | 3 (20.0%)  |         |
| - 2                   | 2 (25.0%) | 0 (0.0%)      | 2 (13.3%)  |         |
| - 3                   | 2 (25.0%) | 3 (42.9%)     | 5 (33.3%)  |         |
| - 4                   | 0 (0.0%)  | 0 (0.0%)      | 0 (0.0%)   |         |
| - 5                   | 0 (0.0%)  | 0 (0.0%)      | 0 (0.0%)   |         |
| - 6                   | 1 (12.5%) | 1 (14.3%)     | 2 (13.3%)  |         |
| - Missing             | 1         | 0             | 1          |         |

\*No secondary endpoint

**Table 10.5.14: Binary mRS at scheduled visit times (PP set)**

|                     | Placebo   | Dexamethasone | All       | p-value |
|---------------------|-----------|---------------|-----------|---------|
| binary mRS month 12 |           |               |           |         |
| - <=2               | 5 (62.5%) | 3 (42.9%)     | 8 (53.3%) | 0.4468  |
| - >2                | 3 (37.5%) | 4 (57.1%)     | 7 (46.7%) |         |
| - Missing           | 1         | 0             | 1         |         |

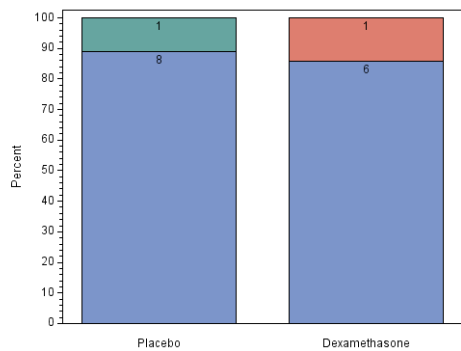

Pre-encephalitis

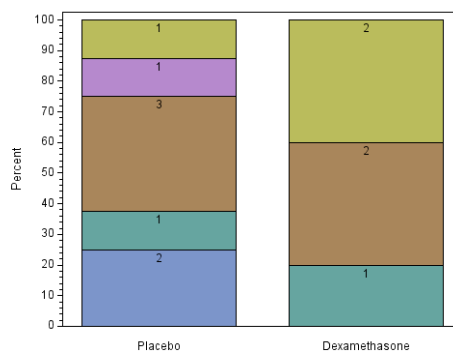

At discharge / day 30

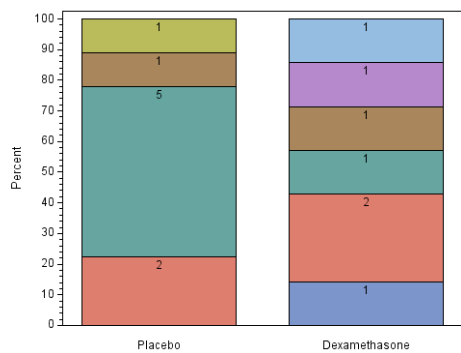

Scheduled month 6

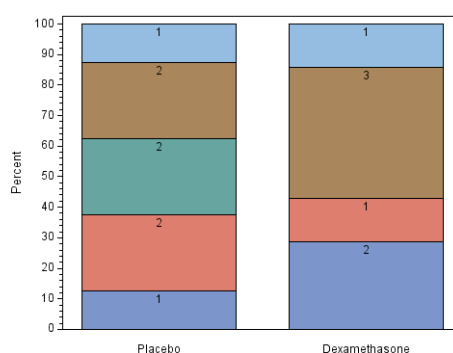

Scheduled month 12

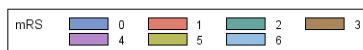

Figure 10.5.4: Stacked bar plots mRS (PP set).



### 10.5.5 Neuropsychological testing at month 6

**Table 10.5.15: Available reasons for missing neuropsychological testing**

| <b>Patient</b> | <b>Neuropsychologic examination</b>                                            |
|----------------|--------------------------------------------------------------------------------|
| 02-005         | No month 6 visit done                                                          |
| 07-102         | No month 6 visit done                                                          |
| 08-004         | No month 6 visit done                                                          |
| 08-009         | No month 6 visit done                                                          |
| 11-001         | No month 6 visit done                                                          |
| 12-033         | no information available                                                       |
| 12-093         | No month 6 visit done                                                          |
| 12-094         | No month 6 visit done                                                          |
| 13-002         | unable to perform tasks                                                        |
| 16-009         | Patient died                                                                   |
| 16-019         | Complex Figure, TMT: withdrawal because of nausea                              |
| 18-001         | Complex Figure: figure of mini-mental test was shown instead of complex figure |
| 19-007         | unable to perform due to neurological deficit.                                 |
| 21-008         | no information available                                                       |
| 26-051         | Complex Figure: refused due to dizziness                                       |

### 10.5.5.1 FAS

**Table 10.5.16: Mini-Mental test (FAS)**

|                              | Placebo<br>N=19 | Dexamethasone<br>N=19 | Total<br>N=38 | p-value             |
|------------------------------|-----------------|-----------------------|---------------|---------------------|
| <b>Orientation</b>           |                 |                       |               |                     |
| - N                          | 13              | 13                    | 26            | 0.907 <sup>*2</sup> |
| - Mean +/- SD                | 9.3 +/-1.0      | 8.9 +/-1.9            | 9.1 +/-1.5    |                     |
| - Median                     | 10.0            | 10.0                  | 10.0          |                     |
| - p25, p75                   | 9.0, 10.0       | 9.0, 10.0             | 9.0, 10.0     |                     |
| - Min, Max                   | 7.0, 10.0       | 4.0, 10.0             | 4.0, 10.0     |                     |
| - Missing                    | 6               | 6                     | 12            |                     |
| <b>Immediate recall</b>      |                 |                       |               |                     |
| - N                          | 13              | 13                    | 26            | 0.356 <sup>*2</sup> |
| - Mean +/- SD                | 2.9 +/-0.3      | 3.0 +/-0.0            | 3.0 +/-0.2    |                     |
| - Median                     | 3.0             | 3.0                   | 3.0           |                     |
| - p25, p75                   | 3.0, 3.0        | 3.0, 3.0              | 3.0, 3.0      |                     |
| - Min, Max                   | 2.0, 3.0        | 3.0, 3.0              | 2.0, 3.0      |                     |
| - Missing                    | 6               | 6                     | 12            |                     |
| <b>Serial 7s total</b>       |                 |                       |               |                     |
| - N                          | 13              | 13                    | 26            | 0.287 <sup>*2</sup> |
| - Mean +/- SD                | 4.3 +/-0.9      | 4.6 +/-0.8            | 4.5 +/-0.8    |                     |
| - Median                     | 5.0             | 5.0                   | 5.0           |                     |
| - p25, p75                   | 4.0, 5.0        | 5.0, 5.0              | 4.0, 5.0      |                     |
| - Min, Max                   | 3.0, 5.0        | 3.0, 5.0              | 3.0, 5.0      |                     |
| - Missing                    | 6               | 6                     | 12            |                     |
| <b>Delayed verbal recall</b> |                 |                       |               |                     |
| - N                          | 13              | 13                    | 26            | 0.398 <sup>*2</sup> |
| - Mean +/- SD                | 1.8 +/-1.4      | 1.3 +/-1.4            | 1.5 +/-1.4    |                     |
| - Median                     | 2.0             | 1.0                   | 2.0           |                     |
| - p25, p75                   | 0.0, 3.0        | 0.0, 3.0              | 0.0, 3.0      |                     |
| - Min, Max                   | 0.0, 3.0        | 0.0, 3.0              | 0.0, 3.0      |                     |
| - Missing                    | 6               | 6                     | 12            |                     |
| <b>Naming</b>                |                 |                       |               |                     |
| - N                          | 13              | 13                    | 26            | 0.263 <sup>*2</sup> |
| - Mean +/- SD                | 8.4 +/-1.0      | 8.7 +/-0.8            | 8.5 +/-0.9    |                     |
| - Median                     | 9.0             | 9.0                   | 9.0           |                     |
| - p25, p75                   | 8.0, 9.0        | 9.0, 9.0              | 8.0, 9.0      |                     |
| - Min, Max                   | 6.0, 9.0        | 7.0, 9.0              | 6.0, 9.0      |                     |
| - Missing                    | 6               | 6                     | 12            |                     |
| <b>Total score</b>           |                 |                       |               |                     |
| - N                          | 13              | 13                    | 26            | 0.775 <sup>*2</sup> |
| - Mean +/- SD                | 26.7 +/-2.6     | 26.5 +/-3.7           | 26.6 +/-3.1   |                     |
| - Median                     | 27.0            | 27.0                  | 27.0          |                     |
| - p25, p75                   | 25.0, 29.0      | 26.0, 29.0            | 25.0, 29.0    |                     |
| - Min, Max                   | 22.0, 30.0      | 19.0, 30.0            | 19.0, 30.0    |                     |
| - Missing                    | 6               | 6                     | 12            |                     |

<sup>\*2</sup> = U-test, two-sided

**Table 10.5.17: Complex Figure (FAS)**

|                                     | <b>Placebo<br/>N=19</b> | <b>Dexamethasone<br/>N=19</b> | <b>Total<br/>N=38</b> | <b>p-value</b>       |
|-------------------------------------|-------------------------|-------------------------------|-----------------------|----------------------|
| <b>Copy</b>                         |                         |                               |                       |                      |
| - N                                 | 13                      | 11                            | 24                    | 0.221 * <sup>2</sup> |
| - Mean +/- SD                       | 32.0 +/-5.7             | 30.5 +/-5.2                   | 31.3 +/-5.4           |                      |
| - Median                            | 34.0                    | 32.0                          | 33.0                  |                      |
| - p25, p75                          | 31.0, 35.0              | 27.0, 33.0                    | 30.8, 35.0            |                      |
| - Min, Max                          | 15.0, 36.0              | 17.5, 36.0                    | 15.0, 36.0            |                      |
| - Missing                           | 6                       | 8                             | 14                    |                      |
| <b>Immediate recall</b>             |                         |                               |                       |                      |
| - N                                 | 11                      | 11                            | 22                    | 0.307 * <sup>2</sup> |
| - Mean +/- SD                       | 13.9 +/-6.5             | 10.6 +/-6.0                   | 12.3 +/-6.3           |                      |
| - Median                            | 11.5                    | 10.0                          | 11.5                  |                      |
| - p25, p75                          | 8.5, 19.0               | 6.5, 15.0                     | 8.0, 15.5             |                      |
| - Min, Max                          | 8.0, 29.5               | 0.0, 21.0                     | 0.0, 29.5             |                      |
| - Missing                           | 8                       | 8                             | 16                    |                      |
| <b>Delayed recall</b>               |                         |                               |                       |                      |
| - N                                 | 11                      | 12                            | 23                    | 0.975 * <sup>2</sup> |
| - Mean +/- SD                       | 12.4 +/-7.1             | 11.3 +/-7.2                   | 11.8 +/-7.0           |                      |
| - Median                            | 10.5                    | 10.8                          | 10.5                  |                      |
| - p25, p75                          | 8.0, 18.0               | 6.8, 17.8                     | 8.0, 18.0             |                      |
| - Min, Max                          | 4.0, 28.5               | 0.0, 20.5                     | 0.0, 28.5             |                      |
| - Missing                           | 8                       | 7                             | 15                    |                      |
| <b>Sum of copy/immediate recall</b> |                         |                               |                       |                      |
| - N                                 | 13                      | 11                            | 24                    | 0.602 * <sup>2</sup> |
| - Mean +/- SD                       | 43.8 +/-11.3            | 41.1 +/-9.9                   | 42.6 +/-10.5          |                      |
| - Median                            | 43.0                    | 42.0                          | 42.5                  |                      |
| - p25, p75                          | 40.5, 50.5              | 32.5, 48.0                    | 35.0, 49.0            |                      |
| - Min, Max                          | 23.0, 64.5              | 25.5, 57.0                    | 23.0, 64.5            |                      |
| - Missing                           | 6                       | 8                             | 14                    |                      |

\*<sup>2</sup> = U-test, two-sided

**Table 10.5.18: Auditory Verbal Learning Test (FAS)**

|                           | <b>Placebo<br/>N=19</b> | <b>Dexamethasone<br/>N=19</b> | <b>Total<br/>N=38</b> | <b>p-value</b>      |
|---------------------------|-------------------------|-------------------------------|-----------------------|---------------------|
| Learning trial (Dg 1-5)   |                         |                               |                       |                     |
| - N                       | 12                      | 13                            | 25                    | 0.103 <sup>*2</sup> |
| - Mean +/- SD             | 42.1 +/-16.9            | 30.6 +/-12.3                  | 36.1 +/-15.5          |                     |
| - Median                  | 43.0                    | 29.0                          | 31.0                  |                     |
| - p25, p75                | 27.5, 55.5              | 27.0, 35.0                    | 27.0, 45.0            |                     |
| - Min, Max                | 17.0, 69.0              | 10.0, 57.0                    | 10.0, 69.0            |                     |
| - Missing                 | 7                       | 6                             | 13                    |                     |
| Interference trial (Dg 6) |                         |                               |                       |                     |
| - N                       | 12                      | 13                            | 25                    | 0.163 <sup>*2</sup> |
| - Mean +/- SD             | 7.4 +/-5.6              | 4.2 +/-4.2                    | 5.8 +/-5.1            |                     |
| - Median                  | 7.0                     | 3.0                           | 4.0                   |                     |
| - p25, p75                | 3.0, 12.0               | 1.0, 6.0                      | 2.0, 10.0             |                     |
| - Min, Max                | 0.0, 16.0               | 0.0, 13.0                     | 0.0, 16.0             |                     |
| - Missing                 | 7                       | 6                             | 13                    |                     |
| Delayed recall (Dg 7)     |                         |                               |                       |                     |
| - N                       | 13                      | 13                            | 26                    | 0.244 <sup>*2</sup> |
| - Mean +/- SD             | 6.1 +/-4.7              | 3.8 +/-4.3                    | 5.0 +/-4.5            |                     |
| - Median                  | 6.0                     | 2.0                           | 4.0                   |                     |
| - p25, p75                | 3.0, 10.0               | 1.0, 5.0                      | 1.0, 8.0              |                     |
| - Min, Max                | 0.0, 15.0               | 0.0, 13.0                     | 0.0, 15.0             |                     |
| - Missing                 | 6                       | 6                             | 12                    |                     |

<sup>\*2</sup> = U-test, two-sided

**Table 10.5.19: Digit Span (FAS)**

|                           | <b>Placebo<br/>N=19</b> | <b>Dexamethasone<br/>N=19</b> | <b>Total<br/>N=38</b> | <b>p-value</b>      |
|---------------------------|-------------------------|-------------------------------|-----------------------|---------------------|
| Digit Span forward Total  |                         |                               |                       |                     |
| - N                       | 13                      | 12                            | 25                    | 0.051 <sup>*2</sup> |
| - Mean +/- SD             | 5.8 +/-2.4              | 8.0 +/-2.3                    | 6.9 +/-2.5            |                     |
| - Median                  | 6.0                     | 8.0                           | 7.0                   |                     |
| - p25, p75                | 4.0, 7.0                | 6.0, 9.5                      | 6.0, 8.0              |                     |
| - Min, Max                | 2.0, 10.0               | 5.0, 13.0                     | 2.0, 13.0             |                     |
| - Missing                 | 6                       | 7                             | 13                    |                     |
| Digit Span forward Range  |                         |                               |                       |                     |
| - N                       | 13                      | 12                            | 25                    | 0.074 <sup>*2</sup> |
| - Mean +/- SD             | 5.0 +/-1.7              | 5.9 +/-0.8                    | 5.4 +/-1.4            |                     |
| - Median                  | 5.0                     | 6.0                           | 5.5                   |                     |
| - p25, p75                | 4.5, 6.0                | 5.3, 6.5                      | 5.0, 6.0              |                     |
| - Min, Max                | 1.0, 8.0                | 4.5, 7.0                      | 1.0, 8.0              |                     |
| - Missing                 | 6                       | 7                             | 13                    |                     |
| Digit Span backward Total |                         |                               |                       |                     |
| - N                       | 13                      | 13                            | 26                    | 0.585 <sup>*2</sup> |
| - Mean +/- SD             | 5.2 +/-2.0              | 5.6 +/-1.9                    | 5.4 +/-1.9            |                     |
| - Median                  | 5.0                     | 6.0                           | 5.5                   |                     |
| - p25, p75                | 4.0, 7.0                | 4.0, 7.0                      | 4.0, 7.0              |                     |
| - Min, Max                | 2.0, 9.0                | 3.0, 9.0                      | 2.0, 9.0              |                     |
| - Missing                 | 6                       | 6                             | 12                    |                     |
| Digit Span backward Range |                         |                               |                       |                     |
| - N                       | 13                      | 13                            | 26                    | 0.299 <sup>*2</sup> |
| - Mean +/- SD             | 3.7 +/-1.2              | 4.2 +/-1.2                    | 3.9 +/-1.2            |                     |
| - Median                  | 4.0                     | 4.0                           | 4.0                   |                     |
| - p25, p75                | 3.0, 4.5                | 4.0, 5.0                      | 3.0, 4.5              |                     |
| - Min, Max                | 2.0, 5.5                | 1.5, 6.0                      | 1.5, 6.0              |                     |
| - Missing                 | 6                       | 6                             | 12                    |                     |

<sup>\*2</sup> = U-test, two-sided

**Table 10.5.20: Trail Making Test (FAS)**

|                    | Placebo<br>N=19 | Dexamethasone<br>N=19 | Total<br>N=38  | p-value             |
|--------------------|-----------------|-----------------------|----------------|---------------------|
| Time Test A (sec.) |                 |                       |                |                     |
| - N                | 13              | 13                    | 26             | 0.101 <sup>*2</sup> |
| - Mean +/- SD      | 45.5 +/-45.3    | 60.0 +/-40.4          | 52.7 +/-42.7   |                     |
| - Median           | 32.0            | 52.0                  | 40.5           |                     |
| - p25, p75         | 28.0, 45.0      | 36.0, 59.0            | 32.0, 54.0     |                     |
| - Min, Max         | 8.0, 189.0      | 24.0, 175.0           | 8.0, 189.0     |                     |
| - Missing          | 6               | 6                     | 12             |                     |
| Time Test B (sec.) |                 |                       |                |                     |
| - N                | 12              | 13                    | 25             | 0.314 <sup>*2</sup> |
| - Mean +/- SD      | 155.3 +/-198.4  | 160.0 +/-95.0         | 157.8 +/-150.2 |                     |
| - Median           | 80.0            | 135.0                 | 119.0          |                     |
| - p25, p75         | 57.5, 147.0     | 91.0, 233.0           | 61.0, 200.0    |                     |
| - Min, Max         | 25.0, 740.0     | 51.0, 300.0           | 25.0, 740.0    |                     |
| - Missing          | 7               | 6                     | 13             |                     |

<sup>\*2</sup> = U-test, two-sided

**Table 10.5.21: Word Fluency (FAS)**

|                     | Placebo<br>N=19 | Dexamethasone<br>N=19 | Total<br>N=38 | p-value             |
|---------------------|-----------------|-----------------------|---------------|---------------------|
| Sum of animal items |                 |                       |               |                     |
| - N                 | 13              | 13                    | 26            | 0.487 <sup>*2</sup> |
| - Mean +/- SD       | 16.3 +/-5.9     | 13.9 +/-4.3           | 15.1 +/-5.2   |                     |
| - Median            | 14.0            | 15.0                  | 14.5          |                     |
| - p25, p75          | 13.0, 20.0      | 12.0, 16.0            | 12.0, 17.0    |                     |
| - Min, Max          | 7.0, 27.0       | 6.0, 21.0             | 6.0, 27.0     |                     |
| - Missing           | 6               | 6                     | 12            |                     |
| Sum of food items   |                 |                       |               |                     |
| - N                 | 13              | 13                    | 26            | 0.521 <sup>*2</sup> |
| - Mean +/- SD       | 16.2 +/-6.3     | 14.8 +/-6.6           | 15.5 +/-6.4   |                     |
| - Median            | 18.0            | 15.0                  | 15.0          |                     |
| - p25, p75          | 12.0, 22.0      | 12.0, 17.0            | 12.0, 20.0    |                     |
| - Min, Max          | 6.0, 24.0       | 2.0, 30.0             | 2.0, 30.0     |                     |
| - Missing           | 6               | 6                     | 12            |                     |
| WF Total            |                 |                       |               |                     |
| - N                 | 13              | 13                    | 26            | 0.572 <sup>*2</sup> |
| - Mean +/- SD       | 32.5 +/-10.6    | 28.8 +/-10.4          | 30.7 +/-10.5  |                     |
| - Median            | 28.0            | 30.0                  | 29.5          |                     |
| - p25, p75          | 25.0, 43.0      | 24.0, 33.0            | 24.0, 38.0    |                     |
| - Min, Max          | 19.0, 48.0      | 9.0, 51.0             | 9.0, 51.0     |                     |
| - Missing           | 6               | 6                     | 12            |                     |

<sup>\*2</sup> = U-test, two-sided

**Table 10.5.22: Hospital Anxiety and Depression Scale HADS-D (FAS)**

|                         | Placebo<br>N=19 | Dexamethasone<br>N=19 | Total<br>N=38 | p-value             |
|-------------------------|-----------------|-----------------------|---------------|---------------------|
| HADS-D Anxiety Score    |                 |                       |               |                     |
| - N                     | 13              | 13                    | 26            | 0.918 <sup>*2</sup> |
| - Mean +/- SD           | 7.6 +/-4.5      | 7.4 +/-4.0            | 7.5 +/-4.2    |                     |
| - Median                | 8.0             | 6.0                   | 7.0           |                     |
| - p25, p75              | 4.0, 11.0       | 5.0, 10.0             | 4.0, 10.0     |                     |
| - Min, Max              | 0.0, 14.0       | 2.0, 15.0             | 0.0, 15.0     |                     |
| - Missing               | 6               | 6                     | 12            |                     |
| HADS-D Depression Score |                 |                       |               |                     |
| - N                     | 13              | 13                    | 26            | 0.699 <sup>*2</sup> |
| - Mean +/- SD           | 7.5 +/-5.2      | 6.8 +/-4.5            | 7.2 +/-4.7    |                     |
| - Median                | 9.0             | 7.0                   | 7.0           |                     |
| - p25, p75              | 3.0, 12.0       | 3.0, 8.0              | 3.0, 11.0     |                     |
| - Min, Max              | 0.0, 16.0       | 1.0, 17.0             | 0.0, 17.0     |                     |
| - Missing               | 6               | 6                     | 12            |                     |

<sup>\*2</sup> = U-test, two-sided

**Table 10.5.23: Categorized Hospital Anxiety and Depression Scale HADS-D (FAS)**

|                         | Placebo<br>N=19 | Dexamethasone<br>N=19 | Total<br>N=38 | p-value             |
|-------------------------|-----------------|-----------------------|---------------|---------------------|
| HADS-D Anxiety Score    |                 |                       |               |                     |
| - negative (0-7)        | 6 ( 46.2%)      | 7 ( 53.8%)            | 13 ( 50.0%)   | 0.642 <sup>*1</sup> |
| - netural (8-10)        | 3 ( 23.1%)      | 4 ( 30.8%)            | 7 ( 26.9%)    |                     |
| - positive (>= 11)      | 4 ( 30.8%)      | 2 ( 15.4%)            | 6 ( 23.1%)    |                     |
| - Missing               | 6               | 6                     | 12            |                     |
| HADS-D Depression Score |                 |                       |               |                     |
| - negative (0-7)        | 6 ( 46.2%)      | 8 ( 61.5%)            | 14 ( 53.8%)   | 0.412 <sup>*1</sup> |
| - netural (8-10)        | 2 ( 15.4%)      | 3 ( 23.1%)            | 5 ( 19.2%)    |                     |
| - positive (>= 11)      | 5 ( 38.5%)      | 2 ( 15.4%)            | 7 ( 26.9%)    |                     |
| - Missing               | 6               | 6                     | 12            |                     |

<sup>\*1</sup> = Chi<sup>2</sup>-test, two-sided

### 10.5.5.2 PP set

**Table 10.5.24: Mini-Mental test (PP set)**

|                              | Placebo<br>N=9 | Dexamethasone<br>N=7 | Total<br>N=16 | p-value             |
|------------------------------|----------------|----------------------|---------------|---------------------|
| <b>Orientation</b>           |                |                      |               |                     |
| - N                          | 6              | 6                    | 12            | 0.214 <sup>*2</sup> |
| - Mean +/- SD                | 9.8 +/-0.4     | 8.8 +/-1.6           | 9.3 +/-1.2    |                     |
| - Median                     | 10.0           | 9.5                  | 10.0          |                     |
| - p25, p75                   | 10.0, 10.0     | 8.0, 10.0            | 9.0, 10.0     |                     |
| - Min, Max                   | 9.0, 10.0      | 6.0, 10.0            | 6.0, 10.0     |                     |
| - Missing                    | 3              | 1                    | 4             |                     |
| <b>Immediate recall</b>      |                |                      |               |                     |
| - N                          | 6              | 6                    | 12            | 1.000 <sup>*2</sup> |
| - Mean +/- SD                | 3.0 +/-0.0     | 3.0 +/-0.0           | 3.0 +/-0.0    |                     |
| - Median                     | 3.0            | 3.0                  | 3.0           |                     |
| - p25, p75                   | 3.0, 3.0       | 3.0, 3.0             | 3.0, 3.0      |                     |
| - Min, Max                   | 3.0, 3.0       | 3.0, 3.0             | 3.0, 3.0      |                     |
| - Missing                    | 3              | 1                    | 4             |                     |
| <b>Serial 7s total</b>       |                |                      |               |                     |
| - N                          | 6              | 6                    | 12            | 0.336 <sup>*2</sup> |
| - Mean +/- SD                | 4.2 +/-1.0     | 4.7 +/-0.8           | 4.4 +/-0.9    |                     |
| - Median                     | 4.5            | 5.0                  | 5.0           |                     |
| - p25, p75                   | 3.0, 5.0       | 5.0, 5.0             | 3.5, 5.0      |                     |
| - Min, Max                   | 3.0, 5.0       | 3.0, 5.0             | 3.0, 5.0      |                     |
| - Missing                    | 3              | 1                    | 4             |                     |
| <b>Delayed verbal recall</b> |                |                      |               |                     |
| - N                          | 6              | 6                    | 12            | 0.256 <sup>*2</sup> |
| - Mean +/- SD                | 1.8 +/-1.5     | 0.8 +/-1.3           | 1.3 +/-1.4    |                     |
| - Median                     | 2.5            | 0.0                  | 1.0           |                     |
| - p25, p75                   | 0.0, 3.0       | 0.0, 2.0             | 0.0, 3.0      |                     |
| - Min, Max                   | 0.0, 3.0       | 0.0, 3.0             | 0.0, 3.0      |                     |
| - Missing                    | 3              | 1                    | 4             |                     |
| <b>Naming</b>                |                |                      |               |                     |
| - N                          | 6              | 6                    | 12            | 1.000 <sup>*2</sup> |
| - Mean +/- SD                | 8.8 +/-0.4     | 8.7 +/-0.8           | 8.8 +/-0.6    |                     |
| - Median                     | 9.0            | 9.0                  | 9.0           |                     |
| - p25, p75                   | 9.0, 9.0       | 9.0, 9.0             | 9.0, 9.0      |                     |
| - Min, Max                   | 8.0, 9.0       | 7.0, 9.0             | 7.0, 9.0      |                     |
| - Missing                    | 3              | 1                    | 4             |                     |
| <b>Total score</b>           |                |                      |               |                     |
| - N                          | 6              | 6                    | 12            | 0.515 <sup>*2</sup> |
| - Mean +/- SD                | 27.7 +/-2.0    | 26.0 +/-3.6          | 26.8 +/-2.9   |                     |
| - Median                     | 28.0           | 27.0                 | 27.0          |                     |
| - p25, p75                   | 26.0, 29.0     | 26.0, 28.0           | 26.0, 29.0    |                     |
| - Min, Max                   | 25.0, 30.0     | 19.0, 29.0           | 19.0, 30.0    |                     |
| - Missing                    | 3              | 1                    | 4             |                     |

<sup>\*2</sup> = U-test, two-sided



**Table 10.5.25: Complex Figure (PP set)**

|                                     | Placebo<br>N=9 | Dexamethasone<br>N=7 | Total<br>N=16 | p-value             |
|-------------------------------------|----------------|----------------------|---------------|---------------------|
| <b>Copy</b>                         |                |                      |               |                     |
| - N                                 | 6              | 5                    | 11            | 0.032 <sup>*2</sup> |
| - Mean +/- SD                       | 34.8 +/-1.5    | 32.3 +/-0.7          | 33.7 +/-1.7   |                     |
| - Median                            | 35.0           | 32.0                 | 33.0          |                     |
| - p25, p75                          | 35.0, 36.0     | 32.0, 33.0           | 32.0, 35.0    |                     |
| - Min, Max                          | 32.0, 36.0     | 31.5, 33.0           | 31.5, 36.0    |                     |
| - Missing                           | 3              | 2                    | 5             |                     |
| <b>Immediate recall</b>             |                |                      |               |                     |
| - N                                 | 6              | 5                    | 11            | 0.411 <sup>*2</sup> |
| - Mean +/- SD                       | 15.5 +/-8.0    | 10.6 +/-4.3          | 13.3 +/-6.8   |                     |
| - Median                            | 14.0           | 10.0                 | 12.5          |                     |
| - p25, p75                          | 8.5, 19.0      | 9.0, 14.5            | 8.5, 15.5     |                     |
| - Min, Max                          | 8.0, 29.5      | 4.5, 15.0            | 4.5, 29.5     |                     |
| - Missing                           | 3              | 2                    | 5             |                     |
| <b>Delayed recall</b>               |                |                      |               |                     |
| - N                                 | 6              | 6                    | 12            | 0.936 <sup>*2</sup> |
| - Mean +/- SD                       | 13.9 +/-8.8    | 11.5 +/-7.8          | 12.7 +/-8.0   |                     |
| - Median                            | 11.8           | 13.3                 | 12.0          |                     |
| - p25, p75                          | 8.0, 19.5      | 5.0, 17.0            | 6.5, 18.3     |                     |
| - Min, Max                          | 4.0, 28.5      | 0.0, 20.5            | 0.0, 28.5     |                     |
| - Missing                           | 3              | 1                    | 4             |                     |
| <b>Sum of copy/immediate recall</b> |                |                      |               |                     |
| - N                                 | 6              | 5                    | 11            | 0.121 <sup>*2</sup> |
| - Mean +/- SD                       | 50.3 +/-8.7    | 42.9 +/-5.0          | 47.0 +/-7.9   |                     |
| - Median                            | 49.5           | 42.0                 | 47.5          |                     |
| - p25, p75                          | 43.0, 55.0     | 41.0, 47.5           | 41.0, 50.5    |                     |
| - Min, Max                          | 40.5, 64.5     | 36.0, 48.0           | 36.0, 64.5    |                     |
| - Missing                           | 3              | 2                    | 5             |                     |

<sup>\*2</sup> = U-test, two-sided

**Table 10.5.26: Auditory Verbal Learning Test (PP set)**

|                                  | <b>Placebo<br/>N=9</b> | <b>Dexamethasone<br/>N=7</b> | <b>Total<br/>N=16</b> | <b>p-value</b>       |
|----------------------------------|------------------------|------------------------------|-----------------------|----------------------|
| <b>Learning trial (Dg 1-5)</b>   |                        |                              |                       |                      |
| - N                              | 6                      | 6                            | 12                    | 0.013 * <sup>2</sup> |
| - Mean +/- SD                    | 46.0 +/-11.9           | 25.8 +/-8.7                  | 35.9 +/-14.5          |                      |
| - Median                         | 46.5                   | 28.0                         | 33.0                  |                      |
| - p25, p75                       | 36.0, 55.0             | 23.0, 31.0                   | 28.0, 46.5            |                      |
| - Min, Max                       | 30.0, 62.0             | 10.0, 35.0                   | 10.0, 62.0            |                      |
| - Missing                        | 3                      | 1                            | 4                     |                      |
| <b>Interference trial (Dg 6)</b> |                        |                              |                       |                      |
| - N                              | 6                      | 6                            | 12                    | 0.053 * <sup>2</sup> |
| - Mean +/- SD                    | 7.7 +/-4.1             | 2.5 +/-2.5                   | 5.1 +/-4.2            |                      |
| - Median                         | 7.5                    | 2.0                          | 4.5                   |                      |
| - p25, p75                       | 4.0, 12.0              | 0.0, 5.0                     | 2.0, 8.0              |                      |
| - Min, Max                       | 3.0, 12.0              | 0.0, 6.0                     | 0.0, 12.0             |                      |
| - Missing                        | 3                      | 1                            | 4                     |                      |
| <b>Delayed recall (Dg 7)</b>     |                        |                              |                       |                      |
| - N                              | 6                      | 6                            | 12                    | 0.012 * <sup>2</sup> |
| - Mean +/- SD                    | 7.2 +/-3.2             | 2.2 +/-1.6                   | 4.7 +/-3.6            |                      |
| - Median                         | 7.5                    | 2.0                          | 3.5                   |                      |
| - p25, p75                       | 4.0, 10.0              | 2.0, 2.0                     | 2.0, 7.5              |                      |
| - Min, Max                       | 3.0, 11.0              | 0.0, 5.0                     | 0.0, 11.0             |                      |
| - Missing                        | 3                      | 1                            | 4                     |                      |

\*<sup>2</sup> = U-test, two-sided

**Table 10.5.27: Digit Span (PP set)**

|                           | Placebo<br>N=9 | Dexamethasone<br>N=7 | Total<br>N=16 | p-value              |
|---------------------------|----------------|----------------------|---------------|----------------------|
| Digit Span forward Total  |                |                      |               |                      |
| - N                       | 6              | 6                    | 12            | 0.346 * <sup>2</sup> |
| - Mean +/- SD             | 5.5 +/-1.4     | 7.0 +/-2.0           | 6.3 +/-1.8    |                      |
| - Median                  | 6.0            | 6.0                  | 6.0           |                      |
| - p25, p75                | 5.0, 6.0       | 6.0, 9.0             | 5.5, 6.5      |                      |
| - Min, Max                | 3.0, 7.0       | 5.0, 10.0            | 3.0, 10.0     |                      |
| - Missing                 | 3              | 1                    | 4             |                      |
| Digit Span forward Range  |                |                      |               |                      |
| - N                       | 6              | 6                    | 12            | 0.285 * <sup>2</sup> |
| - Mean +/- SD             | 5.0 +/-0.4     | 5.7 +/-1.0           | 5.3 +/-0.8    |                      |
| - Median                  | 5.0            | 5.5                  | 5.0           |                      |
| - p25, p75                | 4.5, 5.5       | 5.0, 6.5             | 4.8, 5.8      |                      |
| - Min, Max                | 4.5, 5.5       | 4.5, 7.0             | 4.5, 7.0      |                      |
| - Missing                 | 3              | 1                    | 4             |                      |
| Digit Span backward Total |                |                      |               |                      |
| - N                       | 6              | 6                    | 12            | 0.685 * <sup>2</sup> |
| - Mean +/- SD             | 5.5 +/-2.5     | 6.0 +/-1.8           | 5.8 +/-2.1    |                      |
| - Median                  | 5.5            | 5.5                  | 5.5           |                      |
| - p25, p75                | 3.0, 7.0       | 5.0, 7.0             | 4.0, 7.0      |                      |
| - Min, Max                | 3.0, 9.0       | 4.0, 9.0             | 3.0, 9.0      |                      |
| - Missing                 | 3              | 1                    | 4             |                      |
| Digit Span backward Range |                |                      |               |                      |
| - N                       | 6              | 6                    | 12            | 0.685 * <sup>2</sup> |
| - Mean +/- SD             | 4.1 +/-1.3     | 4.3 +/-0.9           | 4.2 +/-1.1    |                      |
| - Median                  | 4.0            | 4.0                  | 4.0           |                      |
| - p25, p75                | 3.0, 5.5       | 4.0, 4.5             | 3.5, 5.0      |                      |
| - Min, Max                | 2.5, 5.5       | 3.5, 6.0             | 2.5, 6.0      |                      |
| - Missing                 | 3              | 1                    | 4             |                      |

\*<sup>2</sup> = U-test, two-sided

**Table 10.5.28: Trail Making test (PP set)**

|                    | Placebo<br>N=9 | Dexamethasone<br>N=7 | Total<br>N=16 | p-value             |
|--------------------|----------------|----------------------|---------------|---------------------|
| Time Test A (sec.) |                |                      |               |                     |
| - N                | 6              | 6                    | 12            | 0.468 <sup>*2</sup> |
| - Mean +/- SD      | 38.0 +/-11.8   | 46.8 +/-20.2         | 42.4 +/-16.4  |                     |
| - Median           | 32.0           | 45.5                 | 35.5          |                     |
| - p25, p75         | 30.0, 51.0     | 32.0, 53.0           | 31.0, 52.5    |                     |
| - Min, Max         | 28.0, 55.0     | 24.0, 81.0           | 24.0, 81.0    |                     |
| - Missing          | 3              | 1                    | 4             |                     |
| Time Test B (sec.) |                |                      |               |                     |
| - N                | 6              | 6                    | 12            | 0.471 <sup>*2</sup> |
| - Mean +/- SD      | 105.5 +/-39.3  | 157.2 +/-91.2        | 131.3 +/-72.2 |                     |
| - Median           | 104.5          | 129.0                | 121.5         |                     |
| - p25, p75         | 75.0, 144.0    | 91.0, 233.0          | 80.0, 147.0   |                     |
| - Min, Max         | 55.0, 150.0    | 61.0, 300.0          | 55.0, 300.0   |                     |
| - Missing          | 3              | 1                    | 4             |                     |

<sup>\*2</sup> = U-test, two-sided

**Table 10.5.29: Word Fluency (PP set)**

|                     | Placebo<br>N=9 | Dexamethasone<br>N=7 | Total<br>N=16 | p-value             |
|---------------------|----------------|----------------------|---------------|---------------------|
| Sum of animal items |                |                      |               |                     |
| - N                 | 6              | 6                    | 12            | 0.520 <sup>*2</sup> |
| - Mean +/- SD       | 16.5 +/-5.1    | 13.2 +/-3.9          | 14.8 +/-4.6   |                     |
| - Median            | 14.5           | 14.0                 | 14.5          |                     |
| - p25, p75          | 14.0, 20.0     | 11.0, 16.0           | 11.5, 16.5    |                     |
| - Min, Max          | 11.0, 25.0     | 7.0, 17.0            | 7.0, 25.0     |                     |
| - Missing           | 3              | 1                    | 4             |                     |
| Sum of food items   |                |                      |               |                     |
| - N                 | 6              | 6                    | 12            | 0.198 <sup>*2</sup> |
| - Mean +/- SD       | 17.0 +/-5.7    | 12.2 +/-5.5          | 14.6 +/-5.9   |                     |
| - Median            | 16.0           | 12.5                 | 13.5          |                     |
| - p25, p75          | 13.0, 23.0     | 12.0, 17.0           | 12.0, 17.5    |                     |
| - Min, Max          | 10.0, 24.0     | 2.0, 17.0            | 2.0, 24.0     |                     |
| - Missing           | 3              | 1                    | 4             |                     |
| WF Total            |                |                      |               |                     |
| - N                 | 6              | 6                    | 12            | 0.295 <sup>*2</sup> |
| - Mean +/- SD       | 33.5 +/-9.1    | 25.3 +/-9.1          | 29.4 +/-9.7   |                     |
| - Median            | 33.0           | 27.0                 | 29.0          |                     |
| - p25, p75          | 28.0, 43.0     | 23.0, 33.0           | 23.5, 35.5    |                     |
| - Min, Max          | 21.0, 43.0     | 9.0, 33.0            | 9.0, 43.0     |                     |
| - Missing           | 3              | 1                    | 4             |                     |

<sup>\*2</sup> = U-test, two-sided

**Table 10.5.30: Hospital Anxiety and Depression Scale HADS-D (PP set)**

|                         | Placebo<br>N=9 | Dexamethasone<br>N=7 | Total<br>N=16 | p-value             |
|-------------------------|----------------|----------------------|---------------|---------------------|
| HADS-D Anxiety Score    |                |                      |               |                     |
| - N                     | 6              | 6                    | 12            | 0.747 <sup>*2</sup> |
| - Mean +/- SD           | 7.2 +/-4.2     | 6.2 +/-3.8           | 6.7 +/-3.8    |                     |
| - Median                | 7.0            | 5.5                  | 6.0           |                     |
| - p25, p75              | 4.0, 9.0       | 3.0, 9.0             | 3.5, 9.0      |                     |
| - Min, Max              | 2.0, 14.0      | 2.0, 12.0            | 2.0, 14.0     |                     |
| - Missing               | 3              | 1                    | 4             |                     |
| HADS-D Depression Score |                |                      |               |                     |
| - N                     | 6              | 6                    | 12            | 0.686 <sup>*2</sup> |
| - Mean +/- SD           | 7.3 +/-6.0     | 5.5 +/-3.1           | 6.4 +/-4.6    |                     |
| - Median                | 6.0            | 6.0                  | 6.0           |                     |
| - p25, p75              | 3.0, 12.0      | 3.0, 8.0             | 3.0, 9.0      |                     |
| - Min, Max              | 1.0, 16.0      | 1.0, 9.0             | 1.0, 16.0     |                     |
| - Missing               | 3              | 1                    | 4             |                     |

<sup>\*2</sup> = U-test, two-sided

**Table 10.5.31: Categorized Hospital Anxiety and Depression Scale HADS-D (PP set)**

|                         | Placebo<br>N=9 | Dexamethasone<br>N=7 | Total<br>N=16 | p-value             |
|-------------------------|----------------|----------------------|---------------|---------------------|
| HADS-D Anxiety Score    |                |                      |               |                     |
| - negative (0-7)        | 3 ( 50.0%)     | 4 ( 66.7%)           | 7 ( 58.3%)    | 0.788 <sup>*1</sup> |
| - netural (8-10)        | 2 ( 33.3%)     | 1 ( 16.7%)           | 3 ( 25.0%)    |                     |
| - positive (>= 11)      | 1 ( 16.7%)     | 1 ( 16.7%)           | 2 ( 16.7%)    |                     |
| - Missing               | 3              | 1                    | 4             |                     |
| HADS-D Depression Score |                |                      |               |                     |
| - negative (0-7)        | 3 ( 50.0%)     | 4 ( 66.7%)           | 7 ( 58.3%)    | 0.290 <sup>*1</sup> |
| - netural (8-10)        | 1 ( 16.7%)     | 2 ( 33.3%)           | 3 ( 25.0%)    |                     |
| - positive (>= 11)      | 2 ( 33.3%)     | 0 ( 0.0%)            | 2 ( 16.7%)    |                     |
| - Missing               | 3              | 1                    | 4             |                     |

<sup>\*1</sup> = Chi<sup>2</sup>-test, two-sided

## 10.5.6 Barthel index

### 10.5.6.1 FAS

**Table 10.5.32: Barthel index total (FAS)**

|                                      | Placebo<br>N=19 | Dexamethasone<br>N=19 | Total<br>N=38 | p-value              |
|--------------------------------------|-----------------|-----------------------|---------------|----------------------|
| Discharge/Day 30 Barthel Index Total |                 |                       |               |                      |
| - N                                  | 18              | 16                    | 34            | 0.874 * <sup>2</sup> |
| - Mean +/- SD                        | 65.8 +/-37.4    | 68.8 +/-40.3          | 67.2 +/-38.2  |                      |
| - Median                             | 77.5            | 90.0                  | 85.0          |                      |
| - p25, p75                           | 40.0, 100.0     | 37.5, 100.0           | 40.0, 100.0   |                      |
| - Min, Max                           | 5.0, 100.0      | 0.0, 100.0            | 0.0, 100.0    |                      |
| - Missing                            | 1               | 3                     | 4             |                      |
| 6 Months Barthel Index Total         |                 |                       |               |                      |
| - N                                  | 17              | 12                    | 29            | 0.646 * <sup>2</sup> |
| - Mean +/- SD                        | 86.2 +/-31.9    | 93.8 +/-13.0          | 89.3 +/-25.8  |                      |
| - Median                             | 100.0           | 100.0                 | 100.0         |                      |
| - p25, p75                           | 95.0, 100.0     | 95.0, 100.0           | 95.0, 100.0   |                      |
| - Min, Max                           | 0.0, 100.0      | 60.0, 100.0           | 0.0, 100.0    |                      |
| - Missing                            | 2               | 7                     | 9             |                      |
| 12 Months Barthel Index Total        |                 |                       |               |                      |
| - N                                  | 14              | 12                    | 26            | 0.737 * <sup>2</sup> |
| - Mean +/- SD                        | 91.4 +/-26.6    | 92.5 +/-24.4          | 91.9 +/-25.1  |                      |
| - Median                             | 100.0           | 100.0                 | 100.0         |                      |
| - p25, p75                           | 100.0, 100.0    | 100.0, 100.0          | 100.0, 100.0  |                      |
| - Min, Max                           | 0.0, 100.0      | 15.0, 100.0           | 0.0, 100.0    |                      |
| - Missing                            | 5               | 7                     | 12            |                      |

\*<sup>2</sup> = U-test, two-sided

**Table 10.5.33: Barthel index items at discharge/day 30 (FAS)**

|                              | Placebo<br>N=19 | Dexamethasone<br>N=19 | Total<br>N=38 | p-value              |
|------------------------------|-----------------|-----------------------|---------------|----------------------|
| <b>Feeding</b>               |                 |                       |               |                      |
| - 0-unable                   | 3 ( 16.7%)      | 3 ( 18.8%)            | 6 ( 17.6%)    | 0.683 * <sup>1</sup> |
| - 5-needs help               | 7 ( 38.9%)      | 4 ( 25.0%)            | 11 ( 32.4%)   |                      |
| - 10-independent             | 8 ( 44.4%)      | 9 ( 56.3%)            | 17 ( 50.0%)   |                      |
| - Missing                    | 1               | 3                     | 4             |                      |
| <b>Bathing</b>               |                 |                       |               |                      |
| - 0-dependent                | 8 ( 44.4%)      | 7 ( 43.8%)            | 15 ( 44.1%)   | 0.968 * <sup>1</sup> |
| - 5-independent              | 10 ( 55.6%)     | 9 ( 56.3%)            | 19 ( 55.9%)   |                      |
| - Missing                    | 1               | 3                     | 4             |                      |
| <b>Grooming</b>              |                 |                       |               |                      |
| - 0-needs to help            | 9 ( 50.0%)      | 7 ( 43.8%)            | 16 ( 47.1%)   | 0.716 * <sup>1</sup> |
| - 5-independent              | 9 ( 50.0%)      | 9 ( 56.3%)            | 18 ( 52.9%)   |                      |
| - Missing                    | 1               | 3                     | 4             |                      |
| <b>Dressing</b>              |                 |                       |               |                      |
| - 0-dependent                | 5 ( 27.8%)      | 4 ( 25.0%)            | 9 ( 26.5%)    | 0.536 * <sup>1</sup> |
| - 5-needs help               | 6 ( 33.3%)      | 3 ( 18.8%)            | 9 ( 26.5%)    |                      |
| - 10-independent             | 7 ( 38.9%)      | 9 ( 56.3%)            | 16 ( 47.1%)   |                      |
| - Missing                    | 1               | 3                     | 4             |                      |
| <b>Bowels</b>                |                 |                       |               |                      |
| - 0-incontinent              | 3 ( 16.7%)      | 4 ( 25.0%)            | 7 ( 20.6%)    | 0.219 * <sup>1</sup> |
| - 5-occasional accident      | 3 ( 16.7%)      | 0 ( 0.0%)             | 3 ( 8.8%)     |                      |
| - 10-continent               | 12 ( 66.7%)     | 12 ( 75.0%)           | 24 ( 70.6%)   |                      |
| - Missing                    | 1               | 3                     | 4             |                      |
| <b>Bladder</b>               |                 |                       |               |                      |
| - 0-incontinent/catheterized | 5 ( 27.8%)      | 4 ( 25.0%)            | 9 ( 26.5%)    | 0.360 * <sup>1</sup> |
| - 5-occasional accident      | 2 ( 11.1%)      | 0 ( 0.0%)             | 2 ( 5.9%)     |                      |
| - 10-continent               | 11 ( 61.1%)     | 12 ( 75.0%)           | 23 ( 67.6%)   |                      |
| - Missing                    | 1               | 3                     | 4             |                      |
| <b>Toilet Use</b>            |                 |                       |               |                      |
| - 0-dependent                | 5 ( 27.8%)      | 4 ( 25.0%)            | 9 ( 26.5%)    | 0.699 * <sup>1</sup> |
| - 5-needs some help          | 4 ( 22.2%)      | 2 ( 12.5%)            | 6 ( 17.6%)    |                      |
| - 10-independent             | 9 ( 50.0%)      | 10 ( 62.5%)           | 19 ( 55.9%)   |                      |
| - Missing                    | 1               | 3                     | 4             |                      |
| <b>Bladder</b>               |                 |                       |               |                      |
| - 0-incontinent/catheterized | 5 ( 27.8%)      | 4 ( 25.0%)            | 9 ( 26.5%)    | 0.360 * <sup>1</sup> |
| - 5-occasional accident      | 2 ( 11.1%)      | 0 ( 0.0%)             | 2 ( 5.9%)     |                      |
| - 10-continent               | 11 ( 61.1%)     | 12 ( 75.0%)           | 23 ( 67.6%)   |                      |
| - Missing                    | 1               | 3                     | 4             |                      |
| <b>Toilet Use</b>            |                 |                       |               |                      |
| - 0-dependent                | 5 ( 27.8%)      | 4 ( 25.0%)            | 9 ( 26.5%)    | 0.699 * <sup>1</sup> |
| - 5-needs some help          | 4 ( 22.2%)      | 2 ( 12.5%)            | 6 ( 17.6%)    |                      |
| - 10-independent             | 9 ( 50.0%)      | 10 ( 62.5%)           | 19 ( 55.9%)   |                      |
| - Missing                    | 1               | 3                     | 4             |                      |

|                                  | Placebo<br>N=19 | Dexamethasone<br>N=19 | Total<br>N=38 | p-value              |
|----------------------------------|-----------------|-----------------------|---------------|----------------------|
| Transfer (bed to chair and back) |                 |                       |               |                      |
| - 0-unable                       | 0 ( 0.0%)       | 2 ( 12.5%)            | 2 ( 5.9%)     | 0.335 * <sup>1</sup> |
| - 5-major help                   | 5 ( 27.8%)      | 3 ( 18.8%)            | 8 ( 23.5%)    |                      |
| - 10-minor help                  | 3 ( 16.7%)      | 1 ( 6.3%)             | 4 ( 11.8%)    |                      |
| - 15-independent                 | 10 ( 55.6%)     | 10 ( 62.5%)           | 20 ( 58.8%)   |                      |
| - Missing                        | 1               | 3                     | 4             |                      |
| Mobility (on level surfaces)     |                 |                       |               |                      |
| - 0-immobile                     | 4 ( 22.2%)      | 4 ( 25.0%)            | 8 ( 23.5%)    | 0.759 * <sup>1</sup> |
| - 10-walks with help             | 4 ( 22.2%)      | 2 ( 12.5%)            | 6 ( 17.6%)    |                      |
| - 15-independent                 | 10 ( 55.6%)     | 10 ( 62.5%)           | 20 ( 58.8%)   |                      |
| - Missing                        | 1               | 3                     | 4             |                      |
| Stairs                           |                 |                       |               |                      |
| - 0-unable                       | 4 ( 22.2%)      | 5 ( 31.3%)            | 9 ( 26.5%)    | 0.526 * <sup>1</sup> |
| - 5-needs help                   | 5 ( 27.8%)      | 2 ( 12.5%)            | 7 ( 20.6%)    |                      |
| - 10-independent                 | 9 ( 50.0%)      | 9 ( 56.3%)            | 18 ( 52.9%)   |                      |
| - Missing                        | 1               | 3                     | 4             |                      |

\*<sup>1</sup> = Chi<sup>2</sup>-test, two-sided

**Table 10.5.34: Barthel index items at month 6 (FAS)**

|                         | Placebo<br>N=19 | Dexamethasone<br>N=19 | Total<br>N=38 | p-value              |
|-------------------------|-----------------|-----------------------|---------------|----------------------|
| Feeding                 |                 |                       |               |                      |
| - 0-unable              | 2 ( 11.8%)      | 0 ( 0.0%)             | 2 ( 6.7%)     | 0.438 * <sup>1</sup> |
| - 5-needs help          | 1 ( 5.9%)       | 1 ( 7.7%)             | 2 ( 6.7%)     |                      |
| - 10-independent        | 14 ( 82.4%)     | 12 ( 92.3%)           | 26 ( 86.7%)   |                      |
| - Missing               | 2               | 6                     | 8             |                      |
| Bathing                 |                 |                       |               |                      |
| - 0-dependent           | 3 ( 17.6%)      | 2 ( 15.4%)            | 5 ( 16.7%)    | 0.869 * <sup>1</sup> |
| - 5-independent         | 14 ( 82.4%)     | 11 ( 84.6%)           | 25 ( 83.3%)   |                      |
| - Missing               | 2               | 6                     | 8             |                      |
| Grooming                |                 |                       |               |                      |
| - 0-needs to help       | 2 ( 11.8%)      | 3 ( 23.1%)            | 5 ( 16.7%)    | 0.410 * <sup>1</sup> |
| - 5-independent         | 15 ( 88.2%)     | 10 ( 76.9%)           | 25 ( 83.3%)   |                      |
| - Missing               | 2               | 6                     | 8             |                      |
| Dressing                |                 |                       |               |                      |
| - 0-dependent           | 2 ( 11.8%)      | 0 ( 0.0%)             | 2 ( 6.7%)     | 0.392 * <sup>1</sup> |
| - 5-needs help          | 2 ( 11.8%)      | 1 ( 7.7%)             | 3 ( 10.0%)    |                      |
| - 10-independent        | 13 ( 76.5%)     | 12 ( 92.3%)           | 25 ( 83.3%)   |                      |
| - Missing               | 2               | 6                     | 8             |                      |
| Bowels                  |                 |                       |               |                      |
| - 0-incontinent         | 2 ( 11.8%)      | 0 ( 0.0%)             | 2 ( 6.7%)     | 0.240 * <sup>1</sup> |
| - 5-occasional accident | 0 ( 0.0%)       | 1 ( 7.7%)             | 1 ( 3.3%)     |                      |
| - 10-continent          | 15 ( 88.2%)     | 12 ( 92.3%)           | 27 ( 90.0%)   |                      |
| - Missing               | 2               | 6                     | 8             |                      |



|                                         | Placebo<br>N=19 | Dexamethasone<br>N=19 | Total<br>N=38 | p-value              |
|-----------------------------------------|-----------------|-----------------------|---------------|----------------------|
| <b>Bladder</b>                          |                 |                       |               |                      |
| - 0-incontinent/catheterized            | 3 ( 17.6%)      | 0 ( 0.0%)             | 3 ( 10.0%)    | 0.158 * <sup>1</sup> |
| - 5-occasional accident                 | 0 ( 0.0%)       | 1 ( 7.7%)             | 1 ( 3.3%)     |                      |
| - 10-continent                          | 14 ( 82.4%)     | 12 ( 92.3%)           | 26 ( 86.7%)   |                      |
| - Missing                               | 2               | 6                     | 8             |                      |
| <b>Toilet Use</b>                       |                 |                       |               |                      |
| - 0-dependent                           | 2 ( 11.8%)      | 0 ( 0.0%)             | 2 ( 6.7%)     | 0.125 * <sup>1</sup> |
| - 5-needs some help                     | 0 ( 0.0%)       | 2 ( 15.4%)            | 2 ( 6.7%)     |                      |
| - 10-independent                        | 15 ( 88.2%)     | 11 ( 84.6%)           | 26 ( 86.7%)   |                      |
| - Missing                               | 2               | 6                     | 8             |                      |
| <b>Bladder</b>                          |                 |                       |               |                      |
| - 0-incontinent/catheterized            | 3 ( 17.6%)      | 0 ( 0.0%)             | 3 ( 10.0%)    | 0.158 * <sup>1</sup> |
| - 5-occasional accident                 | 0 ( 0.0%)       | 1 ( 7.7%)             | 1 ( 3.3%)     |                      |
| - 10-continent                          | 14 ( 82.4%)     | 12 ( 92.3%)           | 26 ( 86.7%)   |                      |
| - Missing                               | 2               | 6                     | 8             |                      |
| <b>Toilet Use</b>                       |                 |                       |               |                      |
| - 0-dependent                           | 2 ( 11.8%)      | 0 ( 0.0%)             | 2 ( 6.7%)     | 0.125 * <sup>1</sup> |
| - 5-needs some help                     | 0 ( 0.0%)       | 2 ( 15.4%)            | 2 ( 6.7%)     |                      |
| - 10-independent                        | 15 ( 88.2%)     | 11 ( 84.6%)           | 26 ( 86.7%)   |                      |
| - Missing                               | 2               | 6                     | 8             |                      |
| <b>Transfer (bed to chair and back)</b> |                 |                       |               |                      |
| - 0-unable                              | 1 ( 5.9%)       | 0 ( 0.0%)             | 1 ( 3.3%)     | 0.245 * <sup>1</sup> |
| - 5-major help                          | 1 ( 5.9%)       | 0 ( 0.0%)             | 1 ( 3.3%)     |                      |
| - 10-minor help                         | 0 ( 0.0%)       | 2 ( 15.4%)            | 2 ( 6.7%)     |                      |
| - 15-independent                        | 15 ( 88.2%)     | 11 ( 84.6%)           | 26 ( 86.7%)   |                      |
| - Missing                               | 2               | 6                     | 8             |                      |
| <b>Mobility (on level surfaces)</b>     |                 |                       |               |                      |
| - 0-immobile                            | 2 ( 11.8%)      | 0 ( 0.0%)             | 2 ( 6.7%)     | 0.438 * <sup>1</sup> |
| - 10-walks with help                    | 1 ( 5.9%)       | 1 ( 7.7%)             | 2 ( 6.7%)     |                      |
| - 15-independent                        | 14 ( 82.4%)     | 12 ( 92.3%)           | 26 ( 86.7%)   |                      |
| - Missing                               | 2               | 6                     | 8             |                      |
| <b>Stairs</b>                           |                 |                       |               |                      |
| - 0-unable                              | 2 ( 11.8%)      | 1 ( 8.3%)             | 3 ( 10.3%)    | 0.652 * <sup>1</sup> |
| - 5-needs help                          | 1 ( 5.9%)       | 0 ( 0.0%)             | 1 ( 3.4%)     |                      |
| - 10-independent                        | 14 ( 82.4%)     | 11 ( 91.7%)           | 25 ( 86.2%)   |                      |
| - Missing                               | 2               | 7                     | 9             |                      |

\*<sup>1</sup> = Chi<sup>2</sup>-test, two-sided

**Table 10.5.35: Barthel index items at month 12 (FAS)**

|                              | Placebo<br>N=19 | Dexamethasone<br>N=19 | Total<br>N=38 | p-value              |
|------------------------------|-----------------|-----------------------|---------------|----------------------|
| <b>Feeding</b>               |                 |                       |               |                      |
| - 0-unable                   | 1 ( 7.1%)       | 0 ( 0.0%)             | 1 ( 3.8%)     | 0.363 * <sup>1</sup> |
| - 5-needs help               | 0 ( 0.0%)       | 1 ( 8.3%)             | 1 ( 3.8%)     |                      |
| - 10-independent             | 13 ( 92.9%)     | 11 ( 91.7%)           | 24 ( 92.3%)   |                      |
| - Missing                    | 5               | 7                     | 12            |                      |
| <b>Bathing</b>               |                 |                       |               |                      |
| - 0-dependent                | 1 ( 7.1%)       | 1 ( 8.3%)             | 2 ( 7.7%)     | 0.910 * <sup>1</sup> |
| - 5-independent              | 13 ( 92.9%)     | 11 ( 91.7%)           | 24 ( 92.3%)   |                      |
| - Missing                    | 5               | 7                     | 12            |                      |
| <b>Grooming</b>              |                 |                       |               |                      |
| - 0-needs to help            | 1 ( 7.1%)       | 2 ( 16.7%)            | 3 ( 11.5%)    | 0.449 * <sup>1</sup> |
| - 5-independent              | 13 ( 92.9%)     | 10 ( 83.3%)           | 23 ( 88.5%)   |                      |
| - Missing                    | 5               | 7                     | 12            |                      |
| <b>Dressing</b>              |                 |                       |               |                      |
| - 0-dependent                | 1 ( 7.1%)       | 1 ( 8.3%)             | 2 ( 7.7%)     | 0.910 * <sup>1</sup> |
| - 10-independent             | 13 ( 92.9%)     | 11 ( 91.7%)           | 24 ( 92.3%)   |                      |
| - Missing                    | 5               | 7                     | 12            |                      |
| <b>Bowels</b>                |                 |                       |               |                      |
| - 0-incontinent              | 1 ( 7.1%)       | 0 ( 0.0%)             | 1 ( 3.8%)     | 0.363 * <sup>1</sup> |
| - 5-occasional accident      | 0 ( 0.0%)       | 1 ( 8.3%)             | 1 ( 3.8%)     |                      |
| - 10-continent               | 13 ( 92.9%)     | 11 ( 91.7%)           | 24 ( 92.3%)   |                      |
| - Missing                    | 5               | 7                     | 12            |                      |
| <b>Bladder</b>               |                 |                       |               |                      |
| - 0-incontinent/catheterized | 2 ( 14.3%)      | 1 ( 8.3%)             | 3 ( 11.5%)    | 0.636 * <sup>1</sup> |
| - 10-continent               | 12 ( 85.7%)     | 11 ( 91.7%)           | 23 ( 88.5%)   |                      |
| - Missing                    | 5               | 7                     | 12            |                      |
| <b>Toilet Use</b>            |                 |                       |               |                      |
| - 0-dependent                | 1 ( 7.1%)       | 1 ( 8.3%)             | 2 ( 7.7%)     | 0.910 * <sup>1</sup> |
| - 10-independent             | 13 ( 92.9%)     | 11 ( 91.7%)           | 24 ( 92.3%)   |                      |
| - Missing                    | 5               | 7                     | 12            |                      |
| <b>Bladder</b>               |                 |                       |               |                      |
| - 0-incontinent/catheterized | 2 ( 14.3%)      | 1 ( 8.3%)             | 3 ( 11.5%)    | 0.636 * <sup>1</sup> |
| - 10-continent               | 12 ( 85.7%)     | 11 ( 91.7%)           | 23 ( 88.5%)   |                      |
| - Missing                    | 5               | 7                     | 12            |                      |
| <b>Toilet Use</b>            |                 |                       |               |                      |
| - 0-dependent                | 1 ( 7.1%)       | 1 ( 8.3%)             | 2 ( 7.7%)     | 0.910 * <sup>1</sup> |
| - 10-independent             | 13 ( 92.9%)     | 11 ( 91.7%)           | 24 ( 92.3%)   |                      |
| - Missing                    | 5               | 7                     | 12            |                      |

|                                  | Placebo<br>N=19 | Dexamethasone<br>N=19 | Total<br>N=38 | p-value              |
|----------------------------------|-----------------|-----------------------|---------------|----------------------|
| Transfer (bed to chair and back) |                 |                       |               |                      |
| - 0-unable                       | 1 ( 7.1%)       | 0 ( 0.0%)             | 1 ( 3.8%)     | 0.406 * <sup>1</sup> |
| - 5-major help                   | 0 ( 0.0%)       | 1 ( 8.3%)             | 1 ( 3.8%)     |                      |
| - 10-minor help                  | 1 ( 7.1%)       | 0 ( 0.0%)             | 1 ( 3.8%)     |                      |
| - 15-independent                 | 12 ( 85.7%)     | 11 ( 91.7%)           | 23 ( 88.5%)   |                      |
| - Missing                        | 5               | 7                     | 12            |                      |
| Mobility (on level surfaces)     |                 |                       |               |                      |
| - 0-immobile                     | 1 ( 7.1%)       | 1 ( 8.3%)             | 2 ( 7.7%)     | 0.639 * <sup>1</sup> |
| - 10-walks with help             | 1 ( 7.1%)       | 0 ( 0.0%)             | 1 ( 3.8%)     |                      |
| - 15-independent                 | 12 ( 85.7%)     | 11 ( 91.7%)           | 23 ( 88.5%)   |                      |
| - Missing                        | 5               | 7                     | 12            |                      |
| Stairs                           |                 |                       |               |                      |
| - 0-unable                       | 1 ( 7.1%)       | 1 ( 8.3%)             | 2 ( 7.7%)     | 0.910 * <sup>1</sup> |
| - 10-independent                 | 13 ( 92.9%)     | 11 ( 91.7%)           | 24 ( 92.3%)   |                      |
| - Missing                        | 5               | 7                     | 12            |                      |

\*<sup>1</sup> = Chi<sup>2</sup>-test, two-sided

### 10.5.6.2 PP set

Table 10.5.36: Barthel index total (PP set)

|                                      | Placebo<br>N=9 | Dexamethasone<br>N=7 | Total<br>N=16 | p-value              |
|--------------------------------------|----------------|----------------------|---------------|----------------------|
| Discharge/Day 30 Barthel Index Total |                |                      |               |                      |
| - N                                  | 8              | 4                    | 12            | 0.604 * <sup>2</sup> |
| - Mean +/- SD                        | 73.1 +/-33.7   | 58.8 +/-42.1         | 68.3 +/-35.4  |                      |
| - Median                             | 87.5           | 67.5                 | 75.0          |                      |
| - p25, p75                           | 50.0, 100.0    | 32.5, 85.0           | 50.0, 100.0   |                      |
| - Min, Max                           | 10.0, 100.0    | 0.0, 100.0           | 0.0, 100.0    |                      |
| - Missing                            | 1              | 3                    | 4             |                      |
| 6 Months Barthel Index Total         |                |                      |               |                      |
| - N                                  | 9              | 5                    | 14            | 1.000 * <sup>2</sup> |
| - Mean +/- SD                        | 88.3 +/-33.2   | 95.0 +/-11.2         | 90.7 +/-27.0  |                      |
| - Median                             | 100.0          | 100.0                | 100.0         |                      |
| - p25, p75                           | 100.0, 100.0   | 100.0, 100.0         | 100.0, 100.0  |                      |
| - Min, Max                           | 0.0, 100.0     | 75.0, 100.0          | 0.0, 100.0    |                      |
| - Missing                            | 0              | 2                    | 2             |                      |
| 12 Months Barthel Index Total        |                |                      |               |                      |
| - N                                  | 7              | 6                    | 13            | 1.000 * <sup>2</sup> |
| - Mean +/- SD                        | 98.6 +/-3.8    | 99.2 +/-2.0          | 98.8 +/-3.0   |                      |
| - Median                             | 100.0          | 100.0                | 100.0         |                      |
| - p25, p75                           | 100.0, 100.0   | 100.0, 100.0         | 100.0, 100.0  |                      |
| - Min, Max                           | 90.0, 100.0    | 95.0, 100.0          | 90.0, 100.0   |                      |
| - Missing                            | 2              | 1                    | 3             |                      |

\*<sup>2</sup> = U-test, two-sided

**Table 10.5.37: Barthel index items at discharge/day 30 (PP set)**

|                              | Placebo<br>N=9 | Dexamethasone<br>N=7 | Total<br>N=16 | p-value              |
|------------------------------|----------------|----------------------|---------------|----------------------|
| <b>Feeding</b>               |                |                      |               |                      |
| - 0-unable                   | 1 ( 12.5%)     | 1 ( 25.0%)           | 2 ( 16.7%)    | 0.687 * <sup>1</sup> |
| - 5-needs help               | 3 ( 37.5%)     | 2 ( 50.0%)           | 5 ( 41.7%)    |                      |
| - 10-independent             | 4 ( 50.0%)     | 1 ( 25.0%)           | 5 ( 41.7%)    |                      |
| - Missing                    | 1              | 3                    | 4             |                      |
| <b>Bathing</b>               |                |                      |               |                      |
| - 0-dependent                | 3 ( 37.5%)     | 3 ( 75.0%)           | 6 ( 50.0%)    | 0.221 * <sup>1</sup> |
| - 5-independent              | 5 ( 62.5%)     | 1 ( 25.0%)           | 6 ( 50.0%)    |                      |
| - Missing                    | 1              | 3                    | 4             |                      |
| <b>Grooming</b>              |                |                      |               |                      |
| - 0-needs to help            | 3 ( 37.5%)     | 2 ( 50.0%)           | 5 ( 41.7%)    | 0.679 * <sup>1</sup> |
| - 5-independent              | 5 ( 62.5%)     | 2 ( 50.0%)           | 7 ( 58.3%)    |                      |
| - Missing                    | 1              | 3                    | 4             |                      |
| <b>Dressing</b>              |                |                      |               |                      |
| - 0-dependent                | 1 ( 12.5%)     | 1 ( 25.0%)           | 2 ( 16.7%)    | 0.687 * <sup>1</sup> |
| - 5-needs help               | 3 ( 37.5%)     | 2 ( 50.0%)           | 5 ( 41.7%)    |                      |
| - 10-independent             | 4 ( 50.0%)     | 1 ( 25.0%)           | 5 ( 41.7%)    |                      |
| - Missing                    | 1              | 3                    | 4             |                      |
| <b>Bowels</b>                |                |                      |               |                      |
| - 0-incontinent              | 0 ( 0.0%)      | 1 ( 25.0%)           | 1 ( 8.3%)     | 0.223 * <sup>1</sup> |
| - 5-occasional accident      | 2 ( 25.0%)     | 0 ( 0.0%)            | 2 ( 16.7%)    |                      |
| - 10-continent               | 6 ( 75.0%)     | 3 ( 75.0%)           | 9 ( 75.0%)    |                      |
| - Missing                    | 1              | 3                    | 4             |                      |
| <b>Bladder</b>               |                |                      |               |                      |
| - 0-incontinent/catheterized | 2 ( 25.0%)     | 1 ( 25.0%)           | 3 ( 25.0%)    | 0.755 * <sup>1</sup> |
| - 5-occasional accident      | 1 ( 12.5%)     | 0 ( 0.0%)            | 1 ( 8.3%)     |                      |
| - 10-continent               | 5 ( 62.5%)     | 3 ( 75.0%)           | 8 ( 66.7%)    |                      |
| - Missing                    | 1              | 3                    | 4             |                      |
| <b>Toilet Use</b>            |                |                      |               |                      |
| - 0-dependent                | 2 ( 25.0%)     | 1 ( 25.0%)           | 3 ( 25.0%)    | 1.000 * <sup>1</sup> |
| - 5-needs some help          | 2 ( 25.0%)     | 1 ( 25.0%)           | 3 ( 25.0%)    |                      |
| - 10-independent             | 4 ( 50.0%)     | 2 ( 50.0%)           | 6 ( 50.0%)    |                      |
| - Missing                    | 1              | 3                    | 4             |                      |
| <b>Bladder</b>               |                |                      |               |                      |
| - 0-incontinent/catheterized | 2 ( 25.0%)     | 1 ( 25.0%)           | 3 ( 25.0%)    | 0.755 * <sup>1</sup> |
| - 5-occasional accident      | 1 ( 12.5%)     | 0 ( 0.0%)            | 1 ( 8.3%)     |                      |
| - 10-continent               | 5 ( 62.5%)     | 3 ( 75.0%)           | 8 ( 66.7%)    |                      |
| - Missing                    | 1              | 3                    | 4             |                      |

|                                         | Placebo<br>N=9 | Dexamethasone<br>N=7 | Total<br>N=16 | p-value              |
|-----------------------------------------|----------------|----------------------|---------------|----------------------|
| <b>Toilet Use</b>                       |                |                      |               |                      |
| - 0-dependent                           | 2 ( 25.0%)     | 1 ( 25.0%)           | 3 ( 25.0%)    | 1.000 * <sup>1</sup> |
| - 5-needs some help                     | 2 ( 25.0%)     | 1 ( 25.0%)           | 3 ( 25.0%)    |                      |
| - 10-independent                        | 4 ( 50.0%)     | 2 ( 50.0%)           | 6 ( 50.0%)    |                      |
| - Missing                               | 1              | 3                    | 4             |                      |
| <b>Transfer (bed to chair and back)</b> |                |                      |               |                      |
| - 0-unable                              | 0 ( 0.0%)      | 1 ( 25.0%)           | 1 ( 8.3%)     | 0.345 * <sup>1</sup> |
| - 5-major help                          | 1 ( 12.5%)     | 1 ( 25.0%)           | 2 ( 16.7%)    |                      |
| - 10-minor help                         | 2 ( 25.0%)     | 0 ( 0.0%)            | 2 ( 16.7%)    |                      |
| - 15-independent                        | 5 ( 62.5%)     | 2 ( 50.0%)           | 7 ( 58.3%)    |                      |
| - Missing                               | 1              | 3                    | 4             |                      |
| <b>Mobility (on level surfaces)</b>     |                |                      |               |                      |
| - 0-immobile                            | 1 ( 12.5%)     | 1 ( 25.0%)           | 2 ( 16.7%)    | 0.519 * <sup>1</sup> |
| - 10-walks with help                    | 2 ( 25.0%)     | 0 ( 0.0%)            | 2 ( 16.7%)    |                      |
| - 15-independent                        | 5 ( 62.5%)     | 3 ( 75.0%)           | 8 ( 66.7%)    |                      |
| - Missing                               | 1              | 3                    | 4             |                      |
| <b>Stairs</b>                           |                |                      |               |                      |
| - 0-unable                              | 1 ( 12.5%)     | 2 ( 50.0%)           | 3 ( 25.0%)    | 0.363 * <sup>1</sup> |
| - 5-needs help                          | 3 ( 37.5%)     | 1 ( 25.0%)           | 4 ( 33.3%)    |                      |
| - 10-independent                        | 4 ( 50.0%)     | 1 ( 25.0%)           | 5 ( 41.7%)    |                      |
| - Missing                               | 1              | 3                    | 4             |                      |

\*<sup>1</sup> = Chi<sup>2</sup>-test, two-sided

**Table 10.5.38: Barthel index items at month 6 (PP set)**

|                         | Placebo<br>N=9 | Dexamethasone<br>N=7 | Total<br>N=16 | p-value              |
|-------------------------|----------------|----------------------|---------------|----------------------|
| <b>Feeding</b>          |                |                      |               |                      |
| - 0-unable              | 1 ( 11.1%)     | 0 ( 0.0%)            | 1 ( 6.7%)     | 0.398 * <sup>1</sup> |
| - 10-independent        | 8 ( 88.9%)     | 6 (100.0%)           | 14 ( 93.3%)   |                      |
| - Missing               | 0              | 1                    | 1             |                      |
| <b>Bathing</b>          |                |                      |               |                      |
| - 0-dependent           | 1 ( 11.1%)     | 1 ( 16.7%)           | 2 ( 13.3%)    | 0.756 * <sup>1</sup> |
| - 5-independent         | 8 ( 88.9%)     | 5 ( 83.3%)           | 13 ( 86.7%)   |                      |
| - Missing               | 0              | 1                    | 1             |                      |
| <b>Grooming</b>         |                |                      |               |                      |
| - 0-needs to help       | 1 ( 11.1%)     | 2 ( 33.3%)           | 3 ( 20.0%)    | 0.292 * <sup>1</sup> |
| - 5-independent         | 8 ( 88.9%)     | 4 ( 66.7%)           | 12 ( 80.0%)   |                      |
| - Missing               | 0              | 1                    | 1             |                      |
| <b>Dressing</b>         |                |                      |               |                      |
| - 0-dependent           | 1 ( 11.1%)     | 0 ( 0.0%)            | 1 ( 6.7%)     | 0.463 * <sup>1</sup> |
| - 5-needs help          | 1 ( 11.1%)     | 0 ( 0.0%)            | 1 ( 6.7%)     |                      |
| - 10-independent        | 7 ( 77.8%)     | 6 (100.0%)           | 13 ( 86.7%)   |                      |
| - Missing               | 0              | 1                    | 1             |                      |
| <b>Bowels</b>           |                |                      |               |                      |
| - 0-incontinent         | 1 ( 11.1%)     | 0 ( 0.0%)            | 1 ( 6.7%)     | 0.336 * <sup>1</sup> |
| - 5-occasional accident | 0 ( 0.0%)      | 1 ( 16.7%)           | 1 ( 6.7%)     |                      |
| - 10-continent          | 8 ( 88.9%)     | 5 ( 83.3%)           | 13 ( 86.7%)   |                      |
| - Missing               | 0              | 1                    | 1             |                      |

|                                         | Placebo<br>N=9 | Dexamethasone<br>N=7 | Total<br>N=16 | p-value              |
|-----------------------------------------|----------------|----------------------|---------------|----------------------|
| <b>Bladder</b>                          |                |                      |               |                      |
| - 0-incontinent/catheterized            | 1 ( 11.1%)     | 0 ( 0.0%)            | 1 ( 6.7%)     | 0.336 * <sup>1</sup> |
| - 5-occasional accident                 | 0 ( 0.0%)      | 1 ( 16.7%)           | 1 ( 6.7%)     |                      |
| - 10-continent                          | 8 ( 88.9%)     | 5 ( 83.3%)           | 13 ( 86.7%)   |                      |
| - Missing                               | 0              | 1                    | 1             |                      |
| <b>Toilet Use</b>                       |                |                      |               |                      |
| - 0-dependent                           | 1 ( 11.1%)     | 0 ( 0.0%)            | 1 ( 6.7%)     | 0.336 * <sup>1</sup> |
| - 5-needs some help                     | 0 ( 0.0%)      | 1 ( 16.7%)           | 1 ( 6.7%)     |                      |
| - 10-independent                        | 8 ( 88.9%)     | 5 ( 83.3%)           | 13 ( 86.7%)   |                      |
| - Missing                               | 0              | 1                    | 1             |                      |
| <b>Bladder</b>                          |                |                      |               |                      |
| - 0-incontinent/catheterized            | 1 ( 11.1%)     | 0 ( 0.0%)            | 1 ( 6.7%)     | 0.336 * <sup>1</sup> |
| - 5-occasional accident                 | 0 ( 0.0%)      | 1 ( 16.7%)           | 1 ( 6.7%)     |                      |
| - 10-continent                          | 8 ( 88.9%)     | 5 ( 83.3%)           | 13 ( 86.7%)   |                      |
| - Missing                               | 0              | 1                    | 1             |                      |
| <b>Toilet Use</b>                       |                |                      |               |                      |
| - 0-dependent                           | 1 ( 11.1%)     | 0 ( 0.0%)            | 1 ( 6.7%)     | 0.336 * <sup>1</sup> |
| - 5-needs some help                     | 0 ( 0.0%)      | 1 ( 16.7%)           | 1 ( 6.7%)     |                      |
| - 10-independent                        | 8 ( 88.9%)     | 5 ( 83.3%)           | 13 ( 86.7%)   |                      |
| - Missing                               | 0              | 1                    | 1             |                      |
| <b>Transfer (bed to chair and back)</b> |                |                      |               |                      |
| - 0-unable                              | 1 ( 11.1%)     | 0 ( 0.0%)            | 1 ( 6.7%)     | 0.398 * <sup>1</sup> |
| - 15-independent                        | 8 ( 88.9%)     | 6 (100.0%)           | 14 ( 93.3%)   |                      |
| - Missing                               | 0              | 1                    | 1             |                      |
| <b>Mobility (on level surfaces)</b>     |                |                      |               |                      |
| - 0-immobile                            | 1 ( 11.1%)     | 0 ( 0.0%)            | 1 ( 6.7%)     | 0.398 * <sup>1</sup> |
| - 15-independent                        | 8 ( 88.9%)     | 6 (100.0%)           | 14 ( 93.3%)   |                      |
| - Missing                               | 0              | 1                    | 1             |                      |
| <b>Stairs</b>                           |                |                      |               |                      |
| - 0-unable                              | 1 ( 11.1%)     | 0 ( 0.0%)            | 1 ( 7.1%)     | 0.439 * <sup>1</sup> |
| - 10-independent                        | 8 ( 88.9%)     | 5 (100.0%)           | 13 ( 92.9%)   |                      |
| - Missing                               | 0              | 2                    | 2             |                      |

\*<sup>1</sup> = Chi<sup>2</sup>-test, two-sided

**Table 10.5.39: Barthel index items at month 12 (PP set)**

|                                  | Placebo<br>N=9 | Dexamethasone<br>N=7 | Total<br>N=16 | p-value              |
|----------------------------------|----------------|----------------------|---------------|----------------------|
| Feeding                          |                |                      |               |                      |
| - 10-independent                 | 7 (100.0%)     | 6 (100.0%)           | 13 (100.0%)   |                      |
| - Missing                        | 2              | 1                    | 3             |                      |
| Bathing                          |                |                      |               |                      |
| - 5-independent                  | 7 (100.0%)     | 6 (100.0%)           | 13 (100.0%)   |                      |
| - Missing                        | 2              | 1                    | 3             |                      |
| Grooming                         |                |                      |               |                      |
| - 0-needs to help                | 0 ( 0.0%)      | 1 ( 16.7%)           | 1 ( 7.7%)     | 0.261 * <sup>1</sup> |
| - 5-independent                  | 7 (100.0%)     | 5 ( 83.3%)           | 12 ( 92.3%)   |                      |
| - Missing                        | 2              | 1                    | 3             |                      |
| Dressing                         |                |                      |               |                      |
| - 10-independent                 | 7 (100.0%)     | 6 (100.0%)           | 13 (100.0%)   |                      |
| - Missing                        | 2              | 1                    | 3             |                      |
| Bowels                           |                |                      |               |                      |
| - 10-continent                   | 7 (100.0%)     | 6 (100.0%)           | 13 (100.0%)   |                      |
| - Missing                        | 2              | 1                    | 3             |                      |
| Bladder                          |                |                      |               |                      |
| - 10-continent                   | 7 (100.0%)     | 6 (100.0%)           | 13 (100.0%)   |                      |
| - Missing                        | 2              | 1                    | 3             |                      |
| Toilet Use                       |                |                      |               |                      |
| - 10-independent                 | 7 (100.0%)     | 6 (100.0%)           | 13 (100.0%)   |                      |
| - Missing                        | 2              | 1                    | 3             |                      |
| Bladder                          |                |                      |               |                      |
| - 10-continent                   | 7 (100.0%)     | 6 (100.0%)           | 13 (100.0%)   |                      |
| - Missing                        | 2              | 1                    | 3             |                      |
| Toilet Use                       |                |                      |               |                      |
| - 10-independent                 | 7 (100.0%)     | 6 (100.0%)           | 13 (100.0%)   |                      |
| - Missing                        | 2              | 1                    | 3             |                      |
| Transfer (bed to chair and back) |                |                      |               |                      |
| - 10-minor help                  | 1 ( 14.3%)     | 0 ( 0.0%)            | 1 ( 7.7%)     | 0.335 * <sup>1</sup> |
| - 15-independent                 | 6 ( 85.7%)     | 6 (100.0%)           | 12 ( 92.3%)   |                      |
| - Missing                        | 2              | 1                    | 3             |                      |
| Mobility (on level surfaces)     |                |                      |               |                      |
| - 10-walks with help             | 1 ( 14.3%)     | 0 ( 0.0%)            | 1 ( 7.7%)     | 0.335 * <sup>1</sup> |
| - 15-independent                 | 6 ( 85.7%)     | 6 (100.0%)           | 12 ( 92.3%)   |                      |
| - Missing                        | 2              | 1                    | 3             |                      |
| Stairs                           |                |                      |               |                      |
| - 10-independent                 | 7 (100.0%)     | 6 (100.0%)           | 13 (100.0%)   |                      |
| - Missing                        | 2              | 1                    | 3             |                      |

\*<sup>1</sup> = Chi<sup>2</sup>-test, two-sided

## 10.5.7 NIH-scale

### 10.5.7.1 FAS

**Table 10.5.40: NIH total scores (FAS)**

|                            | Placebo<br>N=19 | Dexamethasone<br>N=19 | Total<br>N=38 | p-value             |
|----------------------------|-----------------|-----------------------|---------------|---------------------|
| Day 0 NIH Total*           |                 |                       |               |                     |
| - N                        | 19              | 19                    | 38            | 0.482 <sup>*2</sup> |
| - Mean +/- SD              | 7.7 +/-6.6      | 6.9 +/-7.6            | 7.3 +/-7.0    |                     |
| - Median                   | 6.0             | 5.0                   | 6.0           |                     |
| - p25, p75                 | 3.0, 10.0       | 2.0, 9.0              | 2.0, 9.0      |                     |
| - Min, Max                 | 0.0, 23.0       | 0.0, 31.0             | 0.0, 31.0     |                     |
| - Missing                  | 0               | 0                     | 0             |                     |
| Day 7 NIH Total            |                 |                       |               |                     |
| - N                        | 16              | 19                    | 35            | 0.461 <sup>*2</sup> |
| - Mean +/- SD              | 6.3 +/-7.4      | 4.9 +/-6.4            | 5.6 +/-6.8    |                     |
| - Median                   | 4.0             | 1.0                   | 4.0           |                     |
| - p25, p75                 | 1.0, 9.0        | 0.0, 6.0              | 1.0, 8.0      |                     |
| - Min, Max                 | 0.0, 27.0       | 0.0, 19.0             | 0.0, 27.0     |                     |
| - Missing                  | 3               | 0                     | 3             |                     |
| Discharge/Day 30 NIH Total |                 |                       |               |                     |
| - N                        | 18              | 16                    | 34            | 0.725 <sup>*2</sup> |
| - Mean +/- SD              | 3.7 +/-4.6      | 4.1 +/-5.8            | 3.9 +/-5.2    |                     |
| - Median                   | 2.0             | 1.0                   | 1.5           |                     |
| - p25, p75                 | 0.0, 6.0        | 0.0, 6.5              | 0.0, 6.0      |                     |
| - Min, Max                 | 0.0, 17.0       | 0.0, 19.0             | 0.0, 19.0     |                     |
| - Missing                  | 1               | 3                     | 4             |                     |
| 6 Months NIH Total         |                 |                       |               |                     |
| - N                        | 15              | 13                    | 28            | 0.431 <sup>*2</sup> |
| - Mean +/- SD              | 0.7 +/-1.6      | 0.8 +/-2.0            | 0.8 +/-1.8    |                     |
| - Median                   | 0.0             | 0.0                   | 0.0           |                     |
| - p25, p75                 | 0.0, 1.0        | 0.0, 0.0              | 0.0, 0.5      |                     |
| - Min, Max                 | 0.0, 6.0        | 0.0, 7.0              | 0.0, 7.0      |                     |
| - Missing                  | 4               | 6                     | 10            |                     |
| 12 Months NIH Total        |                 |                       |               |                     |
| - N                        | 14              | 12                    | 26            | 0.429 <sup>*2</sup> |
| - Mean +/- SD              | 1.6 +/-4.2      | 0.7 +/-1.5            | 1.2 +/-3.2    |                     |
| - Median                   | 0.0             | 0.0                   | 0.0           |                     |
| - p25, p75                 | 0.0, 1.0        | 0.0, 0.5              | 0.0, 1.0      |                     |
| - Min, Max                 | 0.0, 16.0       | 0.0, 5.0              | 0.0, 16.0     |                     |
| - Missing                  | 5               | 7                     | 12            |                     |

\* = no primary endpoint, <sup>\*2</sup> = U-test, two-sided



**Table 10.5.41: NIH scale single items day 7 (FAS)**

|                                           | <b>Placebo<br/>N=19</b> | <b>Dexamethasone<br/>N=19</b> | <b>Total<br/>N=38</b> | <b>p-value</b>       |
|-------------------------------------------|-------------------------|-------------------------------|-----------------------|----------------------|
| <b>Level of consciousness</b>             |                         |                               |                       |                      |
| - 0-Alert                                 | 8 ( 47.1%)              | 13 ( 68.4%)                   | 21 ( 58.3%)           | 0.406 * <sup>1</sup> |
| - 1-Drowsy                                | 5 ( 29.4%)              | 2 ( 10.5%)                    | 7 ( 19.4%)            |                      |
| - 2-Stuporous                             | 2 ( 11.8%)              | 1 ( 5.3%)                     | 3 ( 8.3%)             |                      |
| - 3-Coma                                  | 2 ( 11.8%)              | 3 ( 15.8%)                    | 5 ( 13.9%)            |                      |
| - Missing                                 | 2                       | 0                             | 2                     |                      |
| <b>Level of consciousness - questions</b> |                         |                               |                       |                      |
| - 0-Answers both correctly                | 8 ( 50.0%)              | 10 ( 52.6%)                   | 18 ( 51.4%)           | 0.592 * <sup>1</sup> |
| - 1-Answers one correctly                 | 1 ( 6.3%)               | 3 ( 15.8%)                    | 4 ( 11.4%)            |                      |
| - 2-Incorrect                             | 7 ( 43.8%)              | 6 ( 31.6%)                    | 13 ( 37.1%)           |                      |
| - Missing                                 | 3                       | 0                             | 3                     |                      |
| <b>Level of consciousness - commands</b>  |                         |                               |                       |                      |
| - 0-Obeys both correctly                  | 12 ( 75.0%)             | 13 ( 68.4%)                   | 25 ( 71.4%)           | 0.867 * <sup>1</sup> |
| - 1-Obeys one correctly                   | 1 ( 6.3%)               | 1 ( 5.3%)                     | 2 ( 5.7%)             |                      |
| - 2-Incorrect                             | 3 ( 18.8%)              | 5 ( 26.3%)                    | 8 ( 22.9%)            |                      |
| - Missing                                 | 3                       | 0                             | 3                     |                      |
| <b>Pupillary response</b>                 |                         |                               |                       |                      |
| - 0-Both reactive                         | 17 (100.0%)             | 19 (100.0%)                   | 36 (100.0%)           |                      |
| - Missing                                 | 2                       | 0                             | 2                     |                      |
| <b>Best gaze</b>                          |                         |                               |                       |                      |
| - 0-Normal                                | 16 (100.0%)             | 18 ( 94.7%)                   | 34 ( 97.1%)           | 0.352 * <sup>1</sup> |
| - 1-Partial gaze palsy                    | 0 ( 0.0%)               | 1 ( 5.3%)                     | 1 ( 2.9%)             |                      |
| - Missing                                 | 3                       | 0                             | 3                     |                      |
| <b>Best visual</b>                        |                         |                               |                       |                      |
| - 0-No visual loss                        | 14 ( 87.5%)             | 19 (100.0%)                   | 33 ( 94.3%)           | 0.284 * <sup>1</sup> |
| - 1-Partial hemianopia                    | 1 ( 6.3%)               | 0 ( 0.0%)                     | 1 ( 2.9%)             |                      |
| - 2-Complete hemianopia                   | 1 ( 6.3%)               | 0 ( 0.0%)                     | 1 ( 2.9%)             |                      |
| - Missing                                 | 3                       | 0                             | 3                     |                      |
| <b>Facial palsy</b>                       |                         |                               |                       |                      |
| - 0-Normal                                | 11 ( 68.8%)             | 19 (100.0%)                   | 30 ( 85.7%)           | 0.031 * <sup>1</sup> |
| - 1-Minor                                 | 4 ( 25.0%)              | 0 ( 0.0%)                     | 4 ( 11.4%)            |                      |
| - 3-Complete                              | 1 ( 6.3%)               | 0 ( 0.0%)                     | 1 ( 2.9%)             |                      |
| - Missing                                 | 3                       | 0                             | 3                     |                      |
| <b>Best motor - arm</b>                   |                         |                               |                       |                      |
| - 0-No drift                              | 10 ( 62.5%)             | 14 ( 73.7%)                   | 24 ( 68.6%)           | 0.554 * <sup>1</sup> |
| - 1-Drift                                 | 4 ( 25.0%)              | 2 ( 10.5%)                    | 6 ( 17.1%)            |                      |
| - 2-Cannot resist gravity                 | 0 ( 0.0%)               | 1 ( 5.3%)                     | 1 ( 2.9%)             |                      |
| - 3-No effort against gravity             | 2 ( 12.5%)              | 2 ( 10.5%)                    | 4 ( 11.4%)            |                      |
| - Missing                                 | 3                       | 0                             | 3                     |                      |
| <b>Best motor - leg</b>                   |                         |                               |                       |                      |
| - 0-No drift                              | 11 ( 68.8%)             | 13 ( 68.4%)                   | 24 ( 68.6%)           | 0.970 * <sup>1</sup> |
| - 1-Drift                                 | 3 ( 18.8%)              | 3 ( 15.8%)                    | 6 ( 17.1%)            |                      |
| - 2-Cannot resist gravity                 | 1 ( 6.3%)               | 1 ( 5.3%)                     | 2 ( 5.7%)             |                      |
| - 3-No effort against gravity             | 1 ( 6.3%)               | 2 ( 10.5%)                    | 3 ( 8.6%)             |                      |
| - Missing                                 | 3                       | 0                             | 3                     |                      |

|                                  | Placebo<br>N=19 | Dexamethasone<br>N=19 | Total<br>N=38 | p-value              |
|----------------------------------|-----------------|-----------------------|---------------|----------------------|
| Plantar reflex                   |                 |                       |               |                      |
| - 0-Normal                       | 13 ( 81.3%)     | 17 ( 89.5%)           | 30 ( 85.7%)   | 0.150 * <sup>1</sup> |
| - 1-Equivocal                    | 1 ( 6.3%)       | 0 ( 0.0%)             | 1 ( 2.9%)     |                      |
| - 2-One extensor                 | 2 ( 12.5%)      | 0 ( 0.0%)             | 2 ( 5.7%)     |                      |
| - 3-Bilateral extensor           | 0 ( 0.0%)       | 2 ( 10.5%)            | 2 ( 5.7%)     |                      |
| - Missing                        | 3               | 0                     | 3             |                      |
| Limb ataxia                      |                 |                       |               |                      |
| - 0-Absent                       | 15 ( 93.8%)     | 19 (100.0%)           | 34 ( 97.1%)   | 0.269 * <sup>1</sup> |
| - 1-Present in arm or leg        | 1 ( 6.3%)       | 0 ( 0.0%)             | 1 ( 2.9%)     |                      |
| - Missing                        | 3               | 0                     | 3             |                      |
| Sensory                          |                 |                       |               |                      |
| - 0-Normal                       | 12 ( 75.0%)     | 18 ( 94.7%)           | 30 ( 85.7%)   | 0.137 * <sup>1</sup> |
| - 1-Partial loss                 | 3 ( 18.8%)      | 0 ( 0.0%)             | 3 ( 8.6%)     |                      |
| - 2-Dense loss                   | 1 ( 6.3%)       | 1 ( 5.3%)             | 2 ( 5.7%)     |                      |
| - Missing                        | 3               | 0                     | 3             |                      |
| Neglect                          |                 |                       |               |                      |
| - 0-No neglect                   | 12 ( 75.0%)     | 18 ( 94.7%)           | 30 ( 85.7%)   | 0.227 * <sup>1</sup> |
| - 1-Partial neglect              | 3 ( 18.8%)      | 1 ( 5.3%)             | 4 ( 11.4%)    |                      |
| - 2-Complete neglect             | 1 ( 6.3%)       | 0 ( 0.0%)             | 1 ( 2.9%)     |                      |
| - Missing                        | 3               | 0                     | 3             |                      |
| Dysarthria                       |                 |                       |               |                      |
| - 0-Normal articulation          | 12 ( 75.0%)     | 17 ( 89.5%)           | 29 ( 82.9%)   | 0.446 * <sup>1</sup> |
| - 1-Mild to moderate dysarthria  | 3 ( 18.8%)      | 1 ( 5.3%)             | 4 ( 11.4%)    |                      |
| - 2-Near unintelligible or worse | 1 ( 6.3%)       | 1 ( 5.3%)             | 2 ( 5.7%)     |                      |
| - Missing                        | 3               | 0                     | 3             |                      |
| Best language                    |                 |                       |               |                      |
| - 0-No aphasia                   | 6 ( 37.5%)      | 7 ( 36.8%)            | 13 ( 37.1%)   | 0.889 * <sup>1</sup> |
| - 1-Mild to moderate aphasia     | 5 ( 31.3%)      | 7 ( 36.8%)            | 12 ( 34.3%)   |                      |
| - 2-Severe aphasia               | 2 ( 12.5%)      | 1 ( 5.3%)             | 3 ( 8.6%)     |                      |
| - 3-Mute                         | 3 ( 18.8%)      | 4 ( 21.1%)            | 7 ( 20.0%)    |                      |
| - Missing                        | 3               | 0                     | 3             |                      |

\*<sup>1</sup> = Chi<sup>2</sup>-test, two-sided

**Table 10.5.42: NIH scale single items at discharge/day 30 (FAS)**

|                                    | Placebo<br>N=19 | Dexamethasone<br>N=19 | Total<br>N=38 | p-value              |
|------------------------------------|-----------------|-----------------------|---------------|----------------------|
| Level of consciousness             |                 |                       |               |                      |
| - 0-Alert                          | 15 ( 83.3%)     | 14 ( 82.4%)           | 29 ( 82.9%)   | 0.342 * <sup>1</sup> |
| - 1-Drowsy                         | 1 ( 5.6%)       | 0 ( 0.0%)             | 1 ( 2.9%)     |                      |
| - 2-Stuporous                      | 2 ( 11.1%)      | 1 ( 5.9%)             | 3 ( 8.6%)     |                      |
| - 3-Coma                           | 0 ( 0.0%)       | 2 ( 11.8%)            | 2 ( 5.7%)     |                      |
| - Missing                          | 1               | 2                     | 3             |                      |
| Level of consciousness - questions |                 |                       |               |                      |
| - 0-Answers both correctly         | 9 ( 50.0%)      | 11 ( 68.8%)           | 20 ( 58.8%)   | 0.252 * <sup>1</sup> |
| - 1-Answers one correctly          | 5 ( 27.8%)      | 1 ( 6.3%)             | 6 ( 17.6%)    |                      |
| - 2-Incorrect                      | 4 ( 22.2%)      | 4 ( 25.0%)            | 8 ( 23.5%)    |                      |
| - Missing                          | 1               | 3                     | 4             |                      |
| Level of consciousness - commands  |                 |                       |               |                      |
| - 0-Obeys both correctly           | 14 ( 77.8%)     | 12 ( 75.0%)           | 26 ( 76.5%)   | 0.088 * <sup>1</sup> |
| - 1-Obeys one correctly            | 3 ( 16.7%)      | 0 ( 0.0%)             | 3 ( 8.8%)     |                      |
| - 2-Incorrect                      | 1 ( 5.6%)       | 4 ( 25.0%)            | 5 ( 14.7%)    |                      |
| - Missing                          | 1               | 3                     | 4             |                      |
| Pupillary response                 |                 |                       |               |                      |
| - 0-Both reactive                  | 18 (100.0%)     | 17 (100.0%)           | 35 (100.0%)   |                      |
| - Missing                          | 1               | 2                     | 3             |                      |
| Best gaze                          |                 |                       |               |                      |
| - 0-Normal                         | 18 (100.0%)     | 15 ( 93.8%)           | 33 ( 97.1%)   | 0.282 * <sup>1</sup> |
| - 1-Partial gaze palsy             | 0 ( 0.0%)       | 1 ( 6.3%)             | 1 ( 2.9%)     |                      |
| - Missing                          | 1               | 3                     | 4             |                      |
| Best visual                        |                 |                       |               |                      |
| - 0-No visual loss                 | 18 (100.0%)     | 16 (100.0%)           | 34 (100.0%)   |                      |
| - Missing                          | 1               | 3                     | 4             |                      |
| Facial palsy                       |                 |                       |               |                      |
| - 0-Normal                         | 15 ( 83.3%)     | 16 ( 94.1%)           | 31 ( 88.6%)   | 0.316 * <sup>1</sup> |
| - 1-Minor                          | 3 ( 16.7%)      | 1 ( 5.9%)             | 4 ( 11.4%)    |                      |
| - Missing                          | 1               | 2                     | 3             |                      |
| Best motor - arm                   |                 |                       |               |                      |
| - 0-No drift                       | 15 ( 83.3%)     | 10 ( 62.5%)           | 25 ( 73.5%)   | 0.442 * <sup>1</sup> |
| - 1-Drift                          | 1 ( 5.6%)       | 4 ( 25.0%)            | 5 ( 14.7%)    |                      |
| - 2-Cannot resist gravity          | 1 ( 5.6%)       | 1 ( 6.3%)             | 2 ( 5.9%)     |                      |
| - 3-No effort against gravity      | 1 ( 5.6%)       | 1 ( 6.3%)             | 2 ( 5.9%)     |                      |
| - Missing                          | 1               | 3                     | 4             |                      |
| Best motor - leg                   |                 |                       |               |                      |
| - 0-No drift                       | 14 ( 77.8%)     | 12 ( 75.0%)           | 26 ( 76.5%)   | 0.712 * <sup>1</sup> |
| - 1-Drift                          | 2 ( 11.1%)      | 2 ( 12.5%)            | 4 ( 11.8%)    |                      |
| - 2-Cannot resist gravity          | 1 ( 5.6%)       | 0 ( 0.0%)             | 1 ( 2.9%)     |                      |
| - 3-No effort against gravity      | 1 ( 5.6%)       | 2 ( 12.5%)            | 3 ( 8.8%)     |                      |
| - Missing                          | 1               | 3                     | 4             |                      |
| Plantar reflex                     |                 |                       |               |                      |
| - 0-Normal                         | 15 ( 83.3%)     | 17 (100.0%)           | 32 ( 91.4%)   | 0.212 * <sup>1</sup> |
| - 1-Equivocal                      | 2 ( 11.1%)      | 0 ( 0.0%)             | 2 ( 5.7%)     |                      |

|                                  | Placebo<br>N=19 | Dexamethasone<br>N=19 | Total<br>N=38 | p-value              |
|----------------------------------|-----------------|-----------------------|---------------|----------------------|
| - 2-One extensor                 | 1 ( 5.6%)       | 0 ( 0.0%)             | 1 ( 2.9%)     |                      |
| - Missing                        | 1               | 2                     | 3             |                      |
| Limb ataxia                      |                 |                       |               |                      |
| - 0-Absent                       | 16 ( 88.9%)     | 14 ( 87.5%)           | 30 ( 88.2%)   | 0.508 * <sup>1</sup> |
| - 1-Present in arm or leg        | 1 ( 5.6%)       | 2 ( 12.5%)            | 3 ( 8.8%)     |                      |
| - 2-Present in arm and leg       | 1 ( 5.6%)       | 0 ( 0.0%)             | 1 ( 2.9%)     |                      |
| - Missing                        | 1               | 3                     | 4             |                      |
| Sensory                          |                 |                       |               |                      |
| - 0-Normal                       | 17 ( 94.4%)     | 15 ( 93.8%)           | 32 ( 94.1%)   | 0.932 * <sup>1</sup> |
| - 2-Dense loss                   | 1 ( 5.6%)       | 1 ( 6.3%)             | 2 ( 5.9%)     |                      |
| - Missing                        | 1               | 3                     | 4             |                      |
| Neglect                          |                 |                       |               |                      |
| - 0-No neglect                   | 17 ( 94.4%)     | 16 (100.0%)           | 33 ( 97.1%)   | 0.339 * <sup>1</sup> |
| - 1-Partial neglect              | 1 ( 5.6%)       | 0 ( 0.0%)             | 1 ( 2.9%)     |                      |
| - Missing                        | 1               | 3                     | 4             |                      |
| Dysarthria                       |                 |                       |               |                      |
| - 0-Normal articulation          | 16 ( 88.9%)     | 13 ( 81.3%)           | 29 ( 85.3%)   | 0.550 * <sup>1</sup> |
| - 1-Mild to moderate dysarthria  | 2 ( 11.1%)      | 2 ( 12.5%)            | 4 ( 11.8%)    |                      |
| - 2-Near unintelligible or worse | 0 ( 0.0%)       | 1 ( 6.3%)             | 1 ( 2.9%)     |                      |
| - Missing                        | 1               | 3                     | 4             |                      |
| Best language                    |                 |                       |               |                      |
| - 0-No aphasia                   | 8 ( 44.4%)      | 6 ( 37.5%)            | 14 ( 41.2%)   | 0.484 * <sup>1</sup> |
| - 1-Mild to moderate aphasia     | 6 ( 33.3%)      | 7 ( 43.8%)            | 13 ( 38.2%)   |                      |
| - 2-Severe aphasia               | 2 ( 11.1%)      | 0 ( 0.0%)             | 2 ( 5.9%)     |                      |
| - 3-Mute                         | 2 ( 11.1%)      | 3 ( 18.8%)            | 5 ( 14.7%)    |                      |
| - Missing                        | 1               | 3                     | 4             |                      |

\*<sup>1</sup> = Chi<sup>2</sup>-test, two-sided

**Table 10.5.43: NIH scale single items at month 6 (FAS)**

|                                    | Placebo<br>N=19 | Dexamethasone<br>N=19 | Total<br>N=38 | p-value              |
|------------------------------------|-----------------|-----------------------|---------------|----------------------|
| Level of consciousness             |                 |                       |               |                      |
| - 0-Alert                          | 15 ( 93.8%)     | 13 (100.0%)           | 28 ( 96.6%)   | 0.359 * <sup>1</sup> |
| - 3-Coma                           | 1 ( 6.3%)       | 0 ( 0.0%)             | 1 ( 3.4%)     |                      |
| - Missing                          | 3               | 6                     | 9             |                      |
| Level of consciousness - questions |                 |                       |               |                      |
| - 0-Answers both correctly         | 14 ( 87.5%)     | 11 ( 84.6%)           | 25 ( 86.2%)   | 0.975 * <sup>1</sup> |
| - 1-Answers one correctly          | 1 ( 6.3%)       | 1 ( 7.7%)             | 2 ( 6.9%)     |                      |
| - 2-Incorrect                      | 1 ( 6.3%)       | 1 ( 7.7%)             | 2 ( 6.9%)     |                      |
| - Missing                          | 3               | 6                     | 9             |                      |
| Level of consciousness - commands  |                 |                       |               |                      |
| - 0-Obeys both correctly           | 15 ( 93.8%)     | 13 (100.0%)           | 28 ( 96.6%)   | 0.359 * <sup>1</sup> |
| - 2-Incorrect                      | 1 ( 6.3%)       | 0 ( 0.0%)             | 1 ( 3.4%)     |                      |
| - Missing                          | 3               | 6                     | 9             |                      |
| Pupillary response                 |                 |                       |               |                      |
| - 0-Both reactive                  | 16 (100.0%)     | 13 (100.0%)           | 29 (100.0%)   |                      |
| - Missing                          | 3               | 6                     | 9             |                      |
| Best gaze                          |                 |                       |               |                      |
| - 0-Normal                         | 16 (100.0%)     | 13 (100.0%)           | 29 (100.0%)   |                      |
| - Missing                          | 3               | 6                     | 9             |                      |
| Best visual                        |                 |                       |               |                      |
| - 0-No visual loss                 | 16 (100.0%)     | 13 (100.0%)           | 29 (100.0%)   |                      |
| - Missing                          | 3               | 6                     | 9             |                      |
| Facial palsy                       |                 |                       |               |                      |
| - 0-Normal                         | 13 ( 81.3%)     | 13 (100.0%)           | 26 ( 89.7%)   | 0.099 * <sup>1</sup> |
| - 1-Minor                          | 3 ( 18.8%)      | 0 ( 0.0%)             | 3 ( 10.3%)    |                      |
| - Missing                          | 3               | 6                     | 9             |                      |
| Best motor - arm                   |                 |                       |               |                      |
| - 0-No drift                       | 14 ( 87.5%)     | 12 ( 92.3%)           | 26 ( 89.7%)   | 0.653 * <sup>1</sup> |
| - 1-Drift                          | 1 ( 6.3%)       | 1 ( 7.7%)             | 2 ( 6.9%)     |                      |
| - 2-Cannot resist gravity          | 1 ( 6.3%)       | 0 ( 0.0%)             | 1 ( 3.4%)     |                      |
| - Missing                          | 3               | 6                     | 9             |                      |
| Best motor - leg                   |                 |                       |               |                      |
| - 0-No drift                       | 14 ( 87.5%)     | 12 ( 92.3%)           | 26 ( 89.7%)   | 0.653 * <sup>1</sup> |
| - 1-Drift                          | 1 ( 6.3%)       | 1 ( 7.7%)             | 2 ( 6.9%)     |                      |
| - 2-Cannot resist gravity          | 1 ( 6.3%)       | 0 ( 0.0%)             | 1 ( 3.4%)     |                      |
| - Missing                          | 3               | 6                     | 9             |                      |
| Plantar reflex                     |                 |                       |               |                      |
| - 0-Normal                         | 15 ( 93.8%)     | 13 (100.0%)           | 28 ( 96.6%)   | 0.359 * <sup>1</sup> |
| - 1-Equivocal                      | 1 ( 6.3%)       | 0 ( 0.0%)             | 1 ( 3.4%)     |                      |
| - Missing                          | 3               | 6                     | 9             |                      |

|                                  | Placebo<br>N=19 | Dexamethasone<br>N=19 | Total<br>N=38 | p-value             |
|----------------------------------|-----------------|-----------------------|---------------|---------------------|
| Limb ataxia                      |                 |                       |               |                     |
| - 0-Absent                       | 14 ( 93.3%)     | 12 ( 92.3%)           | 26 ( 92.9%)   | 0.364 <sup>*1</sup> |
| - 1-Present in arm or leg        | 1 ( 6.7%)       | 0 ( 0.0%)             | 1 ( 3.6%)     |                     |
| - 2-Present in arm and leg       | 0 ( 0.0%)       | 1 ( 7.7%)             | 1 ( 3.6%)     |                     |
| - Missing                        | 4               | 6                     | 10            |                     |
| Sensory                          |                 |                       |               |                     |
| - 0-Normal                       | 15 (100.0%)     | 12 ( 92.3%)           | 27 ( 96.4%)   | 0.274 <sup>*1</sup> |
| - 1-Partial loss                 | 0 ( 0.0%)       | 1 ( 7.7%)             | 1 ( 3.6%)     |                     |
| - Missing                        | 4               | 6                     | 10            |                     |
| Neglect                          |                 |                       |               |                     |
| - 0-No neglect                   | 14 ( 87.5%)     | 13 (100.0%)           | 27 ( 93.1%)   | 0.418 <sup>*1</sup> |
| - 1-Partial neglect              | 1 ( 6.3%)       | 0 ( 0.0%)             | 1 ( 3.4%)     |                     |
| - 2-Complete neglect             | 1 ( 6.3%)       | 0 ( 0.0%)             | 1 ( 3.4%)     |                     |
| - Missing                        | 3               | 6                     | 9             |                     |
| Dysarthria                       |                 |                       |               |                     |
| - 0-Normal articulation          | 15 ( 93.8%)     | 13 (100.0%)           | 28 ( 96.6%)   | 0.359 <sup>*1</sup> |
| - 2-Near unintelligible or worse | 1 ( 6.3%)       | 0 ( 0.0%)             | 1 ( 3.4%)     |                     |
| - Missing                        | 3               | 6                     | 9             |                     |
| Best language                    |                 |                       |               |                     |
| - 0-No aphasia                   | 12 ( 75.0%)     | 11 ( 84.6%)           | 23 ( 79.3%)   | 0.624 <sup>*1</sup> |
| - 1-Mild to moderate aphasia     | 3 ( 18.8%)      | 2 ( 15.4%)            | 5 ( 17.2%)    |                     |
| - 3-Mute                         | 1 ( 6.3%)       | 0 ( 0.0%)             | 1 ( 3.4%)     |                     |
| - Missing                        | 3               | 6                     | 9             |                     |

<sup>\*1</sup> = Chi<sup>2</sup> -test, two-sided

**Table 10.5.44: NIH scale single items at month 12 (FAS)**

|                                    | Placebo<br>N=19 | Dexamethasone<br>N=19 | Total<br>N=38 | p-value              |
|------------------------------------|-----------------|-----------------------|---------------|----------------------|
| Level of consciousness             |                 |                       |               |                      |
| - 0-Alert                          | 14 (100.0%)     | 12 (100.0%)           | 26 (100.0%)   |                      |
| - Missing                          | 5               | 7                     | 12            |                      |
| Level of consciousness - questions |                 |                       |               |                      |
| - 0-Answers both correctly         | 11 ( 78.6%)     | 11 ( 91.7%)           | 22 ( 84.6%)   | 0.395 * <sup>1</sup> |
| - 1-Answers one correctly          | 2 ( 14.3%)      | 0 ( 0.0%)             | 2 ( 7.7%)     |                      |
| - 2-Incorrect                      | 1 ( 7.1%)       | 1 ( 8.3%)             | 2 ( 7.7%)     |                      |
| - Missing                          | 5               | 7                     | 12            |                      |
| Level of consciousness - commands  |                 |                       |               |                      |
| - 0-Obeys both correctly           | 13 ( 92.9%)     | 12 (100.0%)           | 25 ( 96.2%)   | 0.345 * <sup>1</sup> |
| - 1-Obeys one correctly            | 1 ( 7.1%)       | 0 ( 0.0%)             | 1 ( 3.8%)     |                      |
| - Missing                          | 5               | 7                     | 12            |                      |
| Pupillary response                 |                 |                       |               |                      |
| - 0-Both reactive                  | 14 (100.0%)     | 12 (100.0%)           | 26 (100.0%)   |                      |
| - Missing                          | 5               | 7                     | 12            |                      |
| Best gaze                          |                 |                       |               |                      |
| - 0-Normal                         | 13 ( 92.9%)     | 12 (100.0%)           | 25 ( 96.2%)   | 0.345 * <sup>1</sup> |
| - 2-Forced deviation               | 1 ( 7.1%)       | 0 ( 0.0%)             | 1 ( 3.8%)     |                      |
| - Missing                          | 5               | 7                     | 12            |                      |
| Best visual                        |                 |                       |               |                      |
| - 0-No visual loss                 | 14 (100.0%)     | 12 (100.0%)           | 26 (100.0%)   |                      |
| - Missing                          | 5               | 7                     | 12            |                      |
| Facial palsy                       |                 |                       |               |                      |
| - 0-Normal                         | 14 (100.0%)     | 12 (100.0%)           | 26 (100.0%)   |                      |
| - Missing                          | 5               | 7                     | 12            |                      |
| Best motor - arm                   |                 |                       |               |                      |
| - 0-No drift                       | 13 ( 92.9%)     | 11 ( 91.7%)           | 24 ( 92.3%)   | 0.363 * <sup>1</sup> |
| - 1-Drift                          | 0 ( 0.0%)       | 1 ( 8.3%)             | 1 ( 3.8%)     |                      |
| - 2-Cannot resist gravity          | 1 ( 7.1%)       | 0 ( 0.0%)             | 1 ( 3.8%)     |                      |
| - Missing                          | 5               | 7                     | 12            |                      |
| Best motor - leg                   |                 |                       |               |                      |
| - 0-No drift                       | 13 ( 92.9%)     | 11 ( 91.7%)           | 24 ( 92.3%)   | 0.363 * <sup>1</sup> |
| - 1-Drift                          | 0 ( 0.0%)       | 1 ( 8.3%)             | 1 ( 3.8%)     |                      |
| - 2-Cannot resist gravity          | 1 ( 7.1%)       | 0 ( 0.0%)             | 1 ( 3.8%)     |                      |
| - Missing                          | 5               | 7                     | 12            |                      |
| Plantar reflex                     |                 |                       |               |                      |
| - 0-Normal                         | 13 ( 92.9%)     | 12 (100.0%)           | 25 ( 96.2%)   | 0.345 * <sup>1</sup> |
| - 2-One extensor                   | 1 ( 7.1%)       | 0 ( 0.0%)             | 1 ( 3.8%)     |                      |
| - Missing                          | 5               | 7                     | 12            |                      |
| Limb ataxia                        |                 |                       |               |                      |
| - 0-Absent                         | 14 (100.0%)     | 12 (100.0%)           | 26 (100.0%)   |                      |
| - Missing                          | 5               | 7                     | 12            |                      |

|                                  | Placebo<br>N=19 | Dexamethasone<br>N=19 | Total<br>N=38 | p-value              |
|----------------------------------|-----------------|-----------------------|---------------|----------------------|
| <b>Sensory</b>                   |                 |                       |               |                      |
| - 0-Normal                       | 13 ( 92.9%)     | 10 ( 83.3%)           | 23 ( 88.5%)   | 0.449 * <sup>1</sup> |
| - 1-Partial loss                 | 1 ( 7.1%)       | 2 ( 16.7%)            | 3 ( 11.5%)    |                      |
| - Missing                        | 5               | 7                     | 12            |                      |
| <b>Neglect</b>                   |                 |                       |               |                      |
| - 0-No neglect                   | 14 (100.0%)     | 12 (100.0%)           | 26 (100.0%)   |                      |
| - Missing                        | 5               | 7                     | 12            |                      |
| <b>Dysarthria</b>                |                 |                       |               |                      |
| - 0-Normal articulation          | 12 ( 85.7%)     | 12 (100.0%)           | 24 ( 92.3%)   | 0.395 * <sup>1</sup> |
| - 1-Mild to moderate dysarthria  | 1 ( 7.1%)       | 0 ( 0.0%)             | 1 ( 3.8%)     |                      |
| - 2-Near unintelligible or worse | 1 ( 7.1%)       | 0 ( 0.0%)             | 1 ( 3.8%)     |                      |
| - Missing                        | 5               | 7                     | 12            |                      |
| <b>Best language</b>             |                 |                       |               |                      |
| - 0-No aphasia                   | 10 ( 71.4%)     | 10 ( 83.3%)           | 20 ( 76.9%)   | 0.591 * <sup>1</sup> |
| - 1-Mild to moderate aphasia     | 3 ( 21.4%)      | 2 ( 16.7%)            | 5 ( 19.2%)    |                      |
| - 3-Mute                         | 1 ( 7.1%)       | 0 ( 0.0%)             | 1 ( 3.8%)     |                      |
| - Missing                        | 5               | 7                     | 12            |                      |

\*<sup>1</sup> = Chi<sup>2</sup> -test, two-sided



### 10.5.7.2 PP set

Table 10.5.45: NIH total scores (PP set)

|                            | Placebo<br>N=9 | Dexamethasone<br>N=7 | Total<br>N=16 | p-value             |
|----------------------------|----------------|----------------------|---------------|---------------------|
| Day 0 NIH Total*           |                |                      |               |                     |
| - N                        | 9              | 7                    | 16            | 1.000 <sup>*2</sup> |
| - Mean +/- SD              | 6.0 +/-5.8     | 6.1 +/-5.4           | 6.1 +/-5.4    |                     |
| - Median                   | 6.0            | 5.0                  | 5.5           |                     |
| - p25, p75                 | 2.0, 8.0       | 1.0, 8.0             | 1.5, 8.0      |                     |
| - Min, Max                 | 0.0, 19.0      | 1.0, 17.0            | 0.0, 19.0     |                     |
| - Missing                  | 0              | 0                    | 0             |                     |
| Day 7 NIH Total            |                |                      |               |                     |
| - N                        | 7              | 7                    | 14            | 1.000 <sup>*2</sup> |
| - Mean +/- SD              | 6.7 +/-9.8     | 5.9 +/-8.1           | 6.3 +/-8.7    |                     |
| - Median                   | 2.0            | 1.0                  | 1.5           |                     |
| - p25, p75                 | 0.0, 10.0      | 0.0, 16.0            | 0.0, 10.0     |                     |
| - Min, Max                 | 0.0, 27.0      | 0.0, 19.0            | 0.0, 27.0     |                     |
| - Missing                  | 2              | 0                    | 2             |                     |
| Discharge/Day 30 NIH Total |                |                      |               |                     |
| - N                        | 8              | 4                    | 12            | 0.791 <sup>*2</sup> |
| - Mean +/- SD              | 1.8 +/-2.3     | 5.3 +/-9.2           | 2.9 +/-5.4    |                     |
| - Median                   | 1.0            | 1.0                  | 1.0           |                     |
| - p25, p75                 | 0.0, 3.0       | 0.5, 10.0            | 0.0, 3.0      |                     |
| - Min, Max                 | 0.0, 6.0       | 0.0, 19.0            | 0.0, 19.0     |                     |
| - Missing                  | 1              | 3                    | 4             |                     |
| 6 Months NIH Total         |                |                      |               |                     |
| - N                        | 8              | 6                    | 14            | 0.627 <sup>*2</sup> |
| - Mean +/- SD              | 0.5 +/-0.8     | 0.5 +/-1.2           | 0.5 +/-0.9    |                     |
| - Median                   | 0.0            | 0.0                  | 0.0           |                     |
| - p25, p75                 | 0.0, 1.0       | 0.0, 0.0             | 0.0, 1.0      |                     |
| - Min, Max                 | 0.0, 2.0       | 0.0, 3.0             | 0.0, 3.0      |                     |
| - Missing                  | 1              | 1                    | 2             |                     |
| 12 Months NIH Total        |                |                      |               |                     |
| - N                        | 7              | 6                    | 13            | 0.333 <sup>*2</sup> |
| - Mean +/- SD              | 0.6 +/-0.8     | 0.2 +/-0.4           | 0.4 +/-0.7    |                     |
| - Median                   | 0.0            | 0.0                  | 0.0           |                     |
| - p25, p75                 | 0.0, 1.0       | 0.0, 0.0             | 0.0, 1.0      |                     |
| - Min, Max                 | 0.0, 2.0       | 0.0, 1.0             | 0.0, 2.0      |                     |
| - Missing                  | 2              | 1                    | 3             |                     |

\* = no primary endpoint, <sup>\*2</sup> = U-test, two-sided

**Table 10.5.46: NIH scale single items day 7 (PP set)**

|                                           | Placebo<br>N=9 | Dexamethasone<br>N=7 | Total<br>N=16 | p-value              |
|-------------------------------------------|----------------|----------------------|---------------|----------------------|
| <b>Level of consciousness</b>             |                |                      |               |                      |
| - 0-Alert                                 | 4 ( 57.1%)     | 5 ( 71.4%)           | 9 ( 64.3%)    | 0.485 * <sup>1</sup> |
| - 1-Drowsy                                | 1 ( 14.3%)     | 0 ( 0.0%)            | 1 ( 7.1%)     |                      |
| - 2-Stuporous                             | 1 ( 14.3%)     | 0 ( 0.0%)            | 1 ( 7.1%)     |                      |
| - 3-Coma                                  | 1 ( 14.3%)     | 2 ( 28.6%)           | 3 ( 21.4%)    |                      |
| - Missing                                 | 2              | 0                    | 2             |                      |
| <b>Level of consciousness - questions</b> |                |                      |               |                      |
| - 0-Answers both correctly                | 4 ( 57.1%)     | 3 ( 42.9%)           | 7 ( 50.0%)    | 0.565 * <sup>1</sup> |
| - 1-Answers one correctly                 | 0 ( 0.0%)      | 1 ( 14.3%)           | 1 ( 7.1%)     |                      |
| - 2-Incorrect                             | 3 ( 42.9%)     | 3 ( 42.9%)           | 6 ( 42.9%)    |                      |
| - Missing                                 | 2              | 0                    | 2             |                      |
| <b>Level of consciousness - commands</b>  |                |                      |               |                      |
| - 0-Obeys both correctly                  | 5 ( 71.4%)     | 5 ( 71.4%)           | 10 ( 71.4%)   | 1.000 * <sup>1</sup> |
| - 2-Incorrect                             | 2 ( 28.6%)     | 2 ( 28.6%)           | 4 ( 28.6%)    |                      |
| - Missing                                 | 2              | 0                    | 2             |                      |
| <b>Pupillary response</b>                 |                |                      |               |                      |
| - 0-Both reactive                         | 7 (100.0%)     | 7 (100.0%)           | 14 (100.0%)   |                      |
| - Missing                                 | 2              | 0                    | 2             |                      |
| <b>Best gaze</b>                          |                |                      |               |                      |
| - 0-Normal                                | 7 (100.0%)     | 6 ( 85.7%)           | 13 ( 92.9%)   | 0.299 * <sup>1</sup> |
| - 1-Partial gaze palsy                    | 0 ( 0.0%)      | 1 ( 14.3%)           | 1 ( 7.1%)     |                      |
| - Missing                                 | 2              | 0                    | 2             |                      |
| <b>Best visual</b>                        |                |                      |               |                      |
| - 0-No visual loss                        | 6 ( 85.7%)     | 7 (100.0%)           | 13 ( 92.9%)   | 0.299 * <sup>1</sup> |
| - 2-Complete hemianopia                   | 1 ( 14.3%)     | 0 ( 0.0%)            | 1 ( 7.1%)     |                      |
| - Missing                                 | 2              | 0                    | 2             |                      |
| <b>Facial palsy</b>                       |                |                      |               |                      |
| - 0-Normal                                | 5 ( 71.4%)     | 7 (100.0%)           | 12 ( 85.7%)   | 0.311 * <sup>1</sup> |
| - 1-Minor                                 | 1 ( 14.3%)     | 0 ( 0.0%)            | 1 ( 7.1%)     |                      |
| - 3-Complete                              | 1 ( 14.3%)     | 0 ( 0.0%)            | 1 ( 7.1%)     |                      |
| - Missing                                 | 2              | 0                    | 2             |                      |
| <b>Best motor - arm</b>                   |                |                      |               |                      |
| - 0-No drift                              | 4 ( 57.1%)     | 5 ( 71.4%)           | 9 ( 64.3%)    | 0.295 * <sup>1</sup> |
| - 1-Drift                                 | 2 ( 28.6%)     | 0 ( 0.0%)            | 2 ( 14.3%)    |                      |
| - 3-No effort against gravity             | 1 ( 14.3%)     | 2 ( 28.6%)           | 3 ( 21.4%)    |                      |
| - Missing                                 | 2              | 0                    | 2             |                      |
| <b>Best motor - leg</b>                   |                |                      |               |                      |
| - 0-No drift                              | 5 ( 71.4%)     | 5 ( 71.4%)           | 10 ( 71.4%)   | 0.513 * <sup>1</sup> |
| - 1-Drift                                 | 1 ( 14.3%)     | 0 ( 0.0%)            | 1 ( 7.1%)     |                      |
| - 3-No effort against gravity             | 1 ( 14.3%)     | 2 ( 28.6%)           | 3 ( 21.4%)    |                      |
| - Missing                                 | 2              | 0                    | 2             |                      |

|                                  | Placebo<br>N=9 | Dexamethasone<br>N=7 | Total<br>N=16 | p-value              |
|----------------------------------|----------------|----------------------|---------------|----------------------|
| Plantar reflex                   |                |                      |               |                      |
| - 0-Normal                       | 7 (100.0%)     | 7 (100.0%)           | 14 (100.0%)   |                      |
| - Missing                        | 2              | 0                    | 2             |                      |
| Limb ataxia                      |                |                      |               |                      |
| - 0-Absent                       | 7 (100.0%)     | 7 (100.0%)           | 14 (100.0%)   |                      |
| - Missing                        | 2              | 0                    | 2             |                      |
| Sensory                          |                |                      |               |                      |
| - 0-Normal                       | 6 (85.7%)      | 6 (85.7%)            | 12 (85.7%)    | 1.000 * <sup>1</sup> |
| - 2-Dense loss                   | 1 (14.3%)      | 1 (14.3%)            | 2 (14.3%)     |                      |
| - Missing                        | 2              | 0                    | 2             |                      |
| Neglect                          |                |                      |               |                      |
| - 0-No neglect                   | 5 (71.4%)      | 7 (100.0%)           | 12 (85.7%)    | 0.311 * <sup>1</sup> |
| - 1-Partial neglect              | 1 (14.3%)      | 0 (0.0%)             | 1 (7.1%)      |                      |
| - 2-Complete neglect             | 1 (14.3%)      | 0 (0.0%)             | 1 (7.1%)      |                      |
| - Missing                        | 2              | 0                    | 2             |                      |
| Dysarthria                       |                |                      |               |                      |
| - 0-Normal articulation          | 5 (71.4%)      | 7 (100.0%)           | 12 (85.7%)    | 0.311 * <sup>1</sup> |
| - 1-Mild to moderate dysarthria  | 1 (14.3%)      | 0 (0.0%)             | 1 (7.1%)      |                      |
| - 2-Near unintelligible or worse | 1 (14.3%)      | 0 (0.0%)             | 1 (7.1%)      |                      |
| - Missing                        | 2              | 0                    | 2             |                      |
| Best language                    |                |                      |               |                      |
| - 0-No aphasia                   | 3 (42.9%)      | 3 (42.9%)            | 6 (42.9%)     | 0.721 * <sup>1</sup> |
| - 1-Mild to moderate aphasia     | 2 (28.6%)      | 1 (14.3%)            | 3 (21.4%)     |                      |
| - 2-Severe aphasia               | 0 (0.0%)       | 1 (14.3%)            | 1 (7.1%)      |                      |
| - 3-Mute                         | 2 (28.6%)      | 2 (28.6%)            | 4 (28.6%)     |                      |
| - Missing                        | 2              | 0                    | 2             |                      |

\*<sup>1</sup> = Chi<sup>2</sup>-test, two-sided

**Table 10.5.47: NIH scale single items at discharge/day 30 (PP set)**

|                                    | Placebo<br>N=9 | Dexamethasone<br>N=7 | Total<br>N=16 | p-value              |
|------------------------------------|----------------|----------------------|---------------|----------------------|
| Level of consciousness             |                |                      |               |                      |
| - 0-Alert                          | 8 (100.0%)     | 3 (60.0%)            | 11 (84.6%)    | 0.052 * <sup>1</sup> |
| - 3-Coma                           | 0 (0.0%)       | 2 (40.0%)            | 2 (15.4%)     |                      |
| - Missing                          | 1              | 2                    | 3             |                      |
| Level of consciousness - questions |                |                      |               |                      |
| - 0-Answers both correctly         | 5 (62.5%)      | 3 (75.0%)            | 8 (66.7%)     | 0.519 * <sup>1</sup> |
| - 1-Answers one correctly          | 2 (25.0%)      | 0 (0.0%)             | 2 (16.7%)     |                      |
| - 2-Incorrect                      | 1 (12.5%)      | 1 (25.0%)            | 2 (16.7%)     |                      |
| - Missing                          | 1              | 3                    | 4             |                      |
| Level of consciousness - commands  |                |                      |               |                      |
| - 0-Obeys both correctly           | 7 (87.5%)      | 3 (75.0%)            | 10 (83.3%)    | 0.279 * <sup>1</sup> |
| - 1-Obeys one correctly            | 1 (12.5%)      | 0 (0.0%)             | 1 (8.3%)      |                      |
| - 2-Incorrect                      | 0 (0.0%)       | 1 (25.0%)            | 1 (8.3%)      |                      |
| - Missing                          | 1              | 3                    | 4             |                      |
| Pupillary response                 |                |                      |               |                      |
| - 0-Both reactive                  | 8 (100.0%)     | 5 (100.0%)           | 13 (100.0%)   |                      |
| - Missing                          | 1              | 2                    | 3             |                      |
| Best gaze                          |                |                      |               |                      |
| - 0-Normal                         | 8 (100.0%)     | 3 (75.0%)            | 11 (91.7%)    | 0.140 * <sup>1</sup> |
| - 1-Partial gaze palsy             | 0 (0.0%)       | 1 (25.0%)            | 1 (8.3%)      |                      |
| - Missing                          | 1              | 3                    | 4             |                      |
| Best visual                        |                |                      |               |                      |
| - 0-No visual loss                 | 8 (100.0%)     | 4 (100.0%)           | 12 (100.0%)   |                      |
| - Missing                          | 1              | 3                    | 4             |                      |
| Facial palsy                       |                |                      |               |                      |
| - 0-Normal                         | 7 (87.5%)      | 5 (100.0%)           | 12 (92.3%)    | 0.411 * <sup>1</sup> |
| - 1-Minor                          | 1 (12.5%)      | 0 (0.0%)             | 1 (7.7%)      |                      |
| - Missing                          | 1              | 2                    | 3             |                      |
| Best motor - arm                   |                |                      |               |                      |
| - 0-No drift                       | 8 (100.0%)     | 3 (75.0%)            | 11 (91.7%)    | 0.140 * <sup>1</sup> |
| - 3-No effort against gravity      | 0 (0.0%)       | 1 (25.0%)            | 1 (8.3%)      |                      |
| - Missing                          | 1              | 3                    | 4             |                      |
| Best motor - leg                   |                |                      |               |                      |
| - 0-No drift                       | 7 (87.5%)      | 3 (75.0%)            | 10 (83.3%)    | 0.279 * <sup>1</sup> |
| - 1-Drift                          | 1 (12.5%)      | 0 (0.0%)             | 1 (8.3%)      |                      |
| - 3-No effort against gravity      | 0 (0.0%)       | 1 (25.0%)            | 1 (8.3%)      |                      |
| - Missing                          | 1              | 3                    | 4             |                      |
| Plantar reflex                     |                |                      |               |                      |
| - 0-Normal                         | 8 (100.0%)     | 5 (100.0%)           | 13 (100.0%)   |                      |
| - Missing                          | 1              | 2                    | 3             |                      |

|                                 | Placebo<br>N=9 | Dexamethasone<br>N=7 | Total<br>N=16 | p-value             |
|---------------------------------|----------------|----------------------|---------------|---------------------|
| Limb ataxia                     |                |                      |               |                     |
| - 0-Absent                      | 7 ( 87.5%)     | 4 (100.0%)           | 11 ( 91.7%)   | 0.460 <sup>*1</sup> |
| - 1-Present in arm or leg       | 1 ( 12.5%)     | 0 ( 0.0%)            | 1 ( 8.3%)     |                     |
| - Missing                       | 1              | 3                    | 4             |                     |
| Sensory                         |                |                      |               |                     |
| - 0-Normal                      | 8 (100.0%)     | 3 ( 75.0%)           | 11 ( 91.7%)   | 0.140 <sup>*1</sup> |
| - 2-Dense loss                  | 0 ( 0.0%)      | 1 ( 25.0%)           | 1 ( 8.3%)     |                     |
| - Missing                       | 1              | 3                    | 4             |                     |
| Neglect                         |                |                      |               |                     |
| - 0-No neglect                  | 8 (100.0%)     | 4 (100.0%)           | 12 (100.0%)   |                     |
| - Missing                       | 1              | 3                    | 4             |                     |
| Dysarthria                      |                |                      |               |                     |
| - 0-Normal articulation         | 7 ( 87.5%)     | 4 (100.0%)           | 11 ( 91.7%)   | 0.460 <sup>*1</sup> |
| - 1-Mild to moderate dysarthria | 1 ( 12.5%)     | 0 ( 0.0%)            | 1 ( 8.3%)     |                     |
| - Missing                       | 1              | 3                    | 4             |                     |
| Best language                   |                |                      |               |                     |
| - 0-No aphasia                  | 4 ( 50.0%)     | 1 ( 25.0%)           | 5 ( 41.7%)    | 0.392 <sup>*1</sup> |
| - 1-Mild to moderate aphasia    | 3 ( 37.5%)     | 2 ( 50.0%)           | 5 ( 41.7%)    |                     |
| - 2-Severe aphasia              | 1 ( 12.5%)     | 0 ( 0.0%)            | 1 ( 8.3%)     |                     |
| - 3-Mute                        | 0 ( 0.0%)      | 1 ( 25.0%)           | 1 ( 8.3%)     |                     |
| - Missing                       | 1              | 3                    | 4             |                     |

**Table 10.5.48: NIH scale single items at month 6 (PP set)**

|                                    | Placebo<br>N=9 | Dexamethasone<br>N=7 | Total<br>N=16 | p-value              |
|------------------------------------|----------------|----------------------|---------------|----------------------|
| Level of consciousness             |                |                      |               |                      |
| - 0-Alert                          | 8 (100.0%)     | 6 (100.0%)           | 14 (100.0%)   |                      |
| - Missing                          | 1              | 1                    | 2             |                      |
| Level of consciousness - questions |                |                      |               |                      |
| - 0-Answers both correctly         | 7 ( 87.5%)     | 5 ( 83.3%)           | 12 ( 85.7%)   | 0.825 * <sup>1</sup> |
| - 1-Answers one correctly          | 1 ( 12.5%)     | 1 ( 16.7%)           | 2 ( 14.3%)    |                      |
| - Missing                          | 1              | 1                    | 2             |                      |
| Level of consciousness - commands  |                |                      |               |                      |
| - 0-Obeys both correctly           | 8 (100.0%)     | 6 (100.0%)           | 14 (100.0%)   |                      |
| - Missing                          | 1              | 1                    | 2             |                      |
| Pupillary response                 |                |                      |               |                      |
| - 0-Both reactive                  | 8 (100.0%)     | 6 (100.0%)           | 14 (100.0%)   |                      |
| - Missing                          | 1              | 1                    | 2             |                      |
| Best gaze                          |                |                      |               |                      |
| - 0-Normal                         | 8 (100.0%)     | 6 (100.0%)           | 14 (100.0%)   |                      |
| - Missing                          | 1              | 1                    | 2             |                      |
| Best visual                        |                |                      |               |                      |
| - 0-No visual loss                 | 8 (100.0%)     | 6 (100.0%)           | 14 (100.0%)   |                      |
| - Missing                          | 1              | 1                    | 2             |                      |
| Facial palsy                       |                |                      |               |                      |
| - 0-Normal                         | 7 ( 87.5%)     | 6 (100.0%)           | 13 ( 92.9%)   | 0.369 * <sup>1</sup> |
| - 1-Minor                          | 1 ( 12.5%)     | 0 ( 0.0%)            | 1 ( 7.1%)     |                      |
| - Missing                          | 1              | 1                    | 2             |                      |
| Best motor - arm                   |                |                      |               |                      |
| - 0-No drift                       | 8 (100.0%)     | 6 (100.0%)           | 14 (100.0%)   |                      |
| - Missing                          | 1              | 1                    | 2             |                      |
| Best motor - leg                   |                |                      |               |                      |
| - 0-No drift                       | 8 (100.0%)     | 6 (100.0%)           | 14 (100.0%)   |                      |
| - Missing                          | 1              | 1                    | 2             |                      |
| Plantar reflex                     |                |                      |               |                      |
| - 0-Normal                         | 8 (100.0%)     | 6 (100.0%)           | 14 (100.0%)   |                      |
| - Missing                          | 1              | 1                    | 2             |                      |
| Limb ataxia                        |                |                      |               |                      |
| - 0-Absent                         | 8 (100.0%)     | 6 (100.0%)           | 14 (100.0%)   |                      |
| - Missing                          | 1              | 1                    | 2             |                      |
| Sensory                            |                |                      |               |                      |
| - 0-Normal                         | 8 (100.0%)     | 5 ( 83.3%)           | 13 ( 92.9%)   | 0.231 * <sup>1</sup> |
| - 1-Partial loss                   | 0 ( 0.0%)      | 1 ( 16.7%)           | 1 ( 7.1%)     |                      |
| - Missing                          | 1              | 1                    | 2             |                      |

|                              | <b>Placebo<br/>N=9</b> | <b>Dexamethasone<br/>N=7</b> | <b>Total<br/>N=16</b> | <b>p-value</b>       |
|------------------------------|------------------------|------------------------------|-----------------------|----------------------|
| Neglect                      |                        |                              |                       |                      |
| - 0-No neglect               | 8 (100.0%)             | 6 (100.0%)                   | 14 (100.0%)           |                      |
| - Missing                    | 1                      | 1                            | 2                     |                      |
| Dysarthria                   |                        |                              |                       |                      |
| - 0-Normal articulation      | 8 (100.0%)             | 6 (100.0%)                   | 14 (100.0%)           |                      |
| - Missing                    | 1                      | 1                            | 2                     |                      |
| Best language                |                        |                              |                       |                      |
| - 0-No aphasia               | 6 (75.0%)              | 5 (83.3%)                    | 11 (78.6%)            | 0.707 * <sup>1</sup> |
| - 1-Mild to moderate aphasia | 2 (25.0%)              | 1 (16.7%)                    | 3 (21.4%)             |                      |
| - Missing                    | 1                      | 1                            | 2                     |                      |

**Table 10.5.49: NIH scale single items at month 12 (PP set)**

|                                    | Placebo<br>N=9 | Dexamethasone<br>N=7 | Total<br>N=16 | p-value              |
|------------------------------------|----------------|----------------------|---------------|----------------------|
| Level of consciousness             |                |                      |               |                      |
| - 0-Alert                          | 7 (100.0%)     | 6 (100.0%)           | 13 (100.0%)   |                      |
| - Missing                          | 2              | 1                    | 3             |                      |
| Level of consciousness - questions |                |                      |               | 0.335 * <sup>1</sup> |
| - 0-Answers both correctly         | 6 ( 85.7%)     | 6 (100.0%)           | 12 ( 92.3%)   |                      |
| - 1-Answers one correctly          | 1 ( 14.3%)     | 0 ( 0.0%)            | 1 ( 7.7%)     |                      |
| - Missing                          | 2              | 1                    | 3             |                      |
| Level of consciousness - commands  |                |                      |               |                      |
| - 0-Obeys both correctly           | 7 (100.0%)     | 6 (100.0%)           | 13 (100.0%)   |                      |
| - Missing                          | 2              | 1                    | 3             |                      |
| Pupillary response                 |                |                      |               |                      |
| - 0-Both reactive                  | 7 (100.0%)     | 6 (100.0%)           | 13 (100.0%)   |                      |
| - Missing                          | 2              | 1                    | 3             |                      |
| Best gaze                          |                |                      |               |                      |
| - 0-Normal                         | 7 (100.0%)     | 6 (100.0%)           | 13 (100.0%)   |                      |
| - Missing                          | 2              | 1                    | 3             |                      |
| Best visual                        |                |                      |               |                      |
| - 0-No visual loss                 | 7 (100.0%)     | 6 (100.0%)           | 13 (100.0%)   |                      |
| - Missing                          | 2              | 1                    | 3             |                      |
| Facial palsy                       |                |                      |               |                      |
| - 0-Normal                         | 7 (100.0%)     | 6 (100.0%)           | 13 (100.0%)   |                      |
| - Missing                          | 2              | 1                    | 3             |                      |
| Best motor - arm                   |                |                      |               |                      |
| - 0-No drift                       | 7 (100.0%)     | 6 (100.0%)           | 13 (100.0%)   |                      |
| - Missing                          | 2              | 1                    | 3             |                      |
| Best motor - leg                   |                |                      |               |                      |
| - 0-No drift                       | 7 (100.0%)     | 6 (100.0%)           | 13 (100.0%)   |                      |
| - Missing                          | 2              | 1                    | 3             |                      |
| Plantar reflex                     |                |                      |               |                      |
| - 0-Normal                         | 7 (100.0%)     | 6 (100.0%)           | 13 (100.0%)   |                      |
| - Missing                          | 2              | 1                    | 3             |                      |
| Limb ataxia                        |                |                      |               |                      |
| - 0-Absent                         | 7 (100.0%)     | 6 (100.0%)           | 13 (100.0%)   |                      |
| - Missing                          | 2              | 1                    | 3             |                      |
| Sensory                            |                |                      |               | 0.906 * <sup>1</sup> |
| - 0-Normal                         | 6 ( 85.7%)     | 5 ( 83.3%)           | 11 ( 84.6%)   |                      |
| - 1-Partial loss                   | 1 ( 14.3%)     | 1 ( 16.7%)           | 2 ( 15.4%)    |                      |
| - Missing                          | 2              | 1                    | 3             |                      |



|                              | <b>Placebo<br/>N=9</b> | <b>Dexamethasone<br/>N=7</b> | <b>Total<br/>N=16</b> | <b>p-value</b>       |
|------------------------------|------------------------|------------------------------|-----------------------|----------------------|
| Neglect                      |                        |                              |                       |                      |
| - 0-No neglect               | 7 (100.0%)             | 6 (100.0%)                   | 13 (100.0%)           |                      |
| - Missing                    | 2                      | 1                            | 3                     |                      |
| Dysarthria                   |                        |                              |                       |                      |
| - 0-Normal articulation      | 7 (100.0%)             | 6 (100.0%)                   | 13 (100.0%)           |                      |
| - Missing                    | 2                      | 1                            | 3                     |                      |
| Best language                |                        |                              |                       |                      |
| - 0-No aphasia               | 5 ( 71.4%)             | 6 (100.0%)                   | 11 ( 84.6%)           | 0.155 * <sup>1</sup> |
| - 1-Mild to moderate aphasia | 2 ( 28.6%)             | 0 ( 0.0%)                    | 2 ( 15.4%)            |                      |
| - Missing                    | 2                      | 1                            | 3                     |                      |

\*<sup>1</sup> = Chi<sup>2</sup>-test, two-sided

## 10.6 Safety

### 10.6.1 Physical examination and vital signs

#### 10.6.1.1 Vital signs

Table 10.6.1: Vital signs day 7 (FAS)

|                                 | Placebo<br>N=19 | Dexamethasone<br>N=19 | Total<br>N=38 | p-value             |
|---------------------------------|-----------------|-----------------------|---------------|---------------------|
| Weight (kg)                     |                 |                       |               |                     |
| - N                             | 16              | 15                    | 31            | 0.526 <sup>*2</sup> |
| - Mean +/- SD                   | 76.2 +/-11.6    | 84.2 +/-18.4          | 80.1 +/-15.5  |                     |
| - Median                        | 77.5            | 81.3                  | 80.0          |                     |
| - p25, p75                      | 70.0, 83.0      | 68.0, 98.0            | 68.0, 84.0    |                     |
| - Min, Max                      | 52.5, 100.0     | 65.0, 124.3           | 52.5, 124.3   |                     |
| - Missing                       | 3               | 4                     | 7             |                     |
| Temperature (°C)                |                 |                       |               |                     |
| - N                             | 17              | 19                    | 36            | 0.172 <sup>*2</sup> |
| - Mean +/- SD                   | 37.4 +/-0.6     | 37.1 +/-0.8           | 37.2 +/-0.7   |                     |
| - Median                        | 37.5            | 37.2                  | 37.4          |                     |
| - p25, p75                      | 36.8, 37.8      | 36.4, 37.8            | 36.6, 37.8    |                     |
| - Min, Max                      | 36.6, 38.2      | 35.8, 39.0            | 35.8, 39.0    |                     |
| - Missing                       | 2               | 0                     | 2             |                     |
| Heart rate (bpm)                |                 |                       |               |                     |
| - N                             | 18              | 19                    | 37            | 0.419 <sup>*2</sup> |
| - Mean +/- SD                   | 80.2 +/-15.9    | 75.2 +/-14.2          | 77.6 +/-15.1  |                     |
| - Median                        | 76.0            | 80.0                  | 76.0          |                     |
| - p25, p75                      | 68.0, 84.0      | 60.0, 88.0            | 66.0, 86.0    |                     |
| - Min, Max                      | 62.0, 124.0     | 52.0, 96.0            | 52.0, 124.0   |                     |
| - Missing                       | 1               | 0                     | 1             |                     |
| Systolic blood pressure (mmHg)  |                 |                       |               |                     |
| - N                             | 17              | 19                    | 36            | 0.056 <sup>*2</sup> |
| - Mean +/- SD                   | 127.2 +/-17.1   | 134.3 +/-11.0         | 130.9 +/-14.4 |                     |
| - Median                        | 121.0           | 130.0                 | 130.0         |                     |
| - p25, p75                      | 120.0, 131.0    | 130.0, 140.0          | 120.0, 140.0  |                     |
| - Min, Max                      | 103.0, 175.0    | 110.0, 150.0          | 103.0, 175.0  |                     |
| - Missing                       | 2               | 0                     | 2             |                     |
| Diastolic blood pressure (mmHg) |                 |                       |               |                     |
| - N                             | 17              | 19                    | 36            | 0.061 <sup>*2</sup> |
| - Mean +/- SD                   | 70.5 +/-11.1    | 77.8 +/-12.1          | 74.4 +/-12.1  |                     |
| - Median                        | 70.0            | 80.0                  | 75.0          |                     |
| - p25, p75                      | 65.0, 80.0      | 70.0, 90.0            | 70.0, 80.0    |                     |
| - Min, Max                      | 41.0, 90.0      | 50.0, 100.0           | 41.0, 100.0   |                     |
| - Missing                       | 2               | 0                     | 2             |                     |

<sup>\*2</sup> = U-test, two-sided

**Table 10.6.2: Vital signs at discharge/day 30 (FAS)**

|                                        | <b>Placebo<br/>N=19</b> | <b>Dexamethasone<br/>N=19</b> | <b>Total<br/>N=38</b> | <b>p-value</b>      |
|----------------------------------------|-------------------------|-------------------------------|-----------------------|---------------------|
| <b>Weight (kg)</b>                     |                         |                               |                       |                     |
| - N                                    | 14                      | 14                            | 28                    | 0.800 <sup>*2</sup> |
| - Mean +/- SD                          | 75.9 +/-16.0            | 83.4 +/-19.8                  | 79.7 +/-18.1          |                     |
| - Median                               | 74.7                    | 76.5                          | 75.0                  |                     |
| - p25, p75                             | 69.0, 86.0              | 68.0, 98.0                    | 68.5, 86.5            |                     |
| - Min, Max                             | 39.0, 100.0             | 65.0, 123.0                   | 39.0, 123.0           |                     |
| - Missing                              | 5                       | 5                             | 10                    |                     |
| <b>Temperature (°C)</b>                |                         |                               |                       |                     |
| - N                                    | 18                      | 14                            | 32                    | 0.493 <sup>*2</sup> |
| - Mean +/- SD                          | 36.9 +/-0.4             | 36.9 +/-0.8                   | 36.9 +/-0.6           |                     |
| - Median                               | 36.9                    | 36.7                          | 36.8                  |                     |
| - p25, p75                             | 36.6, 37.1              | 36.4, 37.2                    | 36.5, 37.2            |                     |
| - Min, Max                             | 36.2, 37.7              | 36.0, 38.9                    | 36.0, 38.9            |                     |
| - Missing                              | 1                       | 5                             | 6                     |                     |
| <b>Heart rate (bpm)</b>                |                         |                               |                       |                     |
| - N                                    | 18                      | 15                            | 33                    | 0.842 <sup>*2</sup> |
| - Mean +/- SD                          | 78.1 +/-16.3            | 76.3 +/-20.5                  | 77.3 +/-18.0          |                     |
| - Median                               | 73.0                    | 75.0                          | 74.0                  |                     |
| - p25, p75                             | 68.0, 80.0              | 60.0, 82.0                    | 68.0, 80.0            |                     |
| - Min, Max                             | 56.0, 120.0             | 52.0, 140.0                   | 52.0, 140.0           |                     |
| - Missing                              | 1                       | 4                             | 5                     |                     |
| <b>Systolic blood pressure (mmHg)</b>  |                         |                               |                       |                     |
| - N                                    | 18                      | 15                            | 33                    | 1.000 <sup>*2</sup> |
| - Mean +/- SD                          | 129.6 +/-17.1           | 127.7 +/-12.9                 | 128.7 +/-15.1         |                     |
| - Median                               | 125.0                   | 130.0                         | 130.0                 |                     |
| - p25, p75                             | 120.0, 140.0            | 120.0, 140.0                  | 120.0, 140.0          |                     |
| - Min, Max                             | 110.0, 160.0            | 110.0, 150.0                  | 110.0, 160.0          |                     |
| - Missing                              | 1                       | 4                             | 5                     |                     |
| <b>Diastolic blood pressure (mmHg)</b> |                         |                               |                       |                     |
| - N                                    | 18                      | 15                            | 33                    | 0.365 <sup>*2</sup> |
| - Mean +/- SD                          | 74.2 +/-8.9             | 77.5 +/-11.1                  | 75.7 +/-9.9           |                     |
| - Median                               | 72.5                    | 80.0                          | 78.0                  |                     |
| - p25, p75                             | 70.0, 80.0              | 70.0, 82.0                    | 70.0, 80.0            |                     |
| - Min, Max                             | 60.0, 90.0              | 60.0, 100.0                   | 60.0, 100.0           |                     |
| - Missing                              | 1                       | 4                             | 5                     |                     |

<sup>\*2</sup> = U-test, two-sided

**Table 10.6.3: Vital signs month 6 (FAS)**

|                                        | <b>Placebo<br/>N=19</b> | <b>Dexamethasone<br/>N=19</b> | <b>Total<br/>N=38</b> | <b>p-value</b>      |
|----------------------------------------|-------------------------|-------------------------------|-----------------------|---------------------|
| <b>Weight (kg)</b>                     |                         |                               |                       |                     |
| - N                                    | 17                      | 12                            | 29                    | 0.451 <sup>*2</sup> |
| - Mean +/- SD                          | 73.4 +/-10.3            | 79.1 +/-19.4                  | 75.8 +/-14.7          |                     |
| - Median                               | 75.5                    | 78.0                          | 76.0                  |                     |
| - p25, p75                             | 70.0, 76.1              | 65.2, 88.5                    | 66.4, 85.8            |                     |
| - Min, Max                             | 54.0, 90.0              | 55.0, 125.0                   | 54.0, 125.0           |                     |
| - Missing                              | 2                       | 7                             | 9                     |                     |
| <b>Temperature (°C)</b>                |                         |                               |                       |                     |
| - N                                    | 13                      | 12                            | 25                    | 0.722 <sup>*2</sup> |
| - Mean +/- SD                          | 36.7 +/-0.4             | 36.6 +/-0.4                   | 36.6 +/-0.4           |                     |
| - Median                               | 36.6                    | 36.6                          | 36.6                  |                     |
| - p25, p75                             | 36.3, 37.0              | 36.4, 36.8                    | 36.3, 36.8            |                     |
| - Min, Max                             | 36.2, 37.3              | 36.0, 37.1                    | 36.0, 37.3            |                     |
| - Missing                              | 6                       | 7                             | 13                    |                     |
| <b>Heart rate (bpm)</b>                |                         |                               |                       |                     |
| - N                                    | 15                      | 13                            | 28                    | 0.061 <sup>*2</sup> |
| - Mean +/- SD                          | 77.5 +/-15.6            | 67.9 +/-7.1                   | 73.1 +/-13.2          |                     |
| - Median                               | 78.0                    | 66.0                          | 72.0                  |                     |
| - p25, p75                             | 66.0, 88.0              | 62.0, 72.0                    | 63.0, 80.0            |                     |
| - Min, Max                             | 52.0, 116.0             | 60.0, 80.0                    | 52.0, 116.0           |                     |
| - Missing                              | 4                       | 6                             | 10                    |                     |
| <b>Systolic blood pressure (mmHg)</b>  |                         |                               |                       |                     |
| - N                                    | 16                      | 13                            | 29                    | 0.402 <sup>*2</sup> |
| - Mean +/- SD                          | 133.1 +/-18.1           | 128.2 +/-14.4                 | 130.9 +/-16.4         |                     |
| - Median                               | 130.0                   | 125.0                         | 130.0                 |                     |
| - p25, p75                             | 122.5, 149.0            | 120.0, 135.0                  | 120.0, 140.0          |                     |
| - Min, Max                             | 100.0, 165.0            | 100.0, 160.0                  | 100.0, 165.0          |                     |
| - Missing                              | 3                       | 6                             | 9                     |                     |
| <b>Diastolic blood pressure (mmHg)</b> |                         |                               |                       |                     |
| - N                                    | 16                      | 13                            | 29                    | 0.546 <sup>*2</sup> |
| - Mean +/- SD                          | 79.5 +/-12.3            | 77.3 +/-7.3                   | 78.5 +/-10.2          |                     |
| - Median                               | 80.0                    | 80.0                          | 80.0                  |                     |
| - p25, p75                             | 70.0, 86.0              | 70.0, 80.0                    | 70.0, 85.0            |                     |
| - Min, Max                             | 60.0, 100.0             | 70.0, 90.0                    | 60.0, 100.0           |                     |
| - Missing                              | 3                       | 6                             | 9                     |                     |

<sup>\*2</sup> = U-test, two-sided

**Table 10.6.4: Vital signs month 12 (FAS)**

|                                        | Placebo<br>N=19 | Dexamethasone<br>N=19 | Total<br>N=38 | p-value             |
|----------------------------------------|-----------------|-----------------------|---------------|---------------------|
| <b>Weight (kg)</b>                     |                 |                       |               |                     |
| - N                                    | 13              | 12                    | 25            | 0.446 <sup>*2</sup> |
| - Mean +/- SD                          | 75.4 +/-8.3     | 82.0 +/-17.1          | 78.6 +/-13.4  |                     |
| - Median                               | 77.0            | 79.5                  | 78.0          |                     |
| - p25, p75                             | 72.3, 80.0      | 69.8, 89.5            | 70.0, 84.0    |                     |
| - Min, Max                             | 59.0, 88.0      | 65.0, 127.5           | 59.0, 127.5   |                     |
| - Missing                              | 6               | 7                     | 13            |                     |
| <b>Temperature (°C)</b>                |                 |                       |               |                     |
| - N                                    | 12              | 10                    | 22            | 0.765 <sup>*2</sup> |
| - Mean +/- SD                          | 36.6 +/-0.4     | 36.6 +/-0.4           | 36.6 +/-0.4   |                     |
| - Median                               | 36.6            | 36.4                  | 36.6          |                     |
| - p25, p75                             | 36.3, 36.9      | 36.3, 37.0            | 36.3, 37.0    |                     |
| - Min, Max                             | 36.0, 37.1      | 36.0, 37.0            | 36.0, 37.1    |                     |
| - Missing                              | 7               | 9                     | 16            |                     |
| <b>Heart rate (bpm)</b>                |                 |                       |               |                     |
| - N                                    | 14              | 12                    | 26            | 0.336 <sup>*2</sup> |
| - Mean +/- SD                          | 71.0 +/-7.7     | 74.3 +/-8.2           | 72.5 +/-7.9   |                     |
| - Median                               | 72.0            | 73.5                  | 72.0          |                     |
| - p25, p75                             | 65.0, 78.0      | 70.0, 79.0            | 67.0, 78.0    |                     |
| - Min, Max                             | 56.0, 84.0      | 60.0, 88.0            | 56.0, 88.0    |                     |
| - Missing                              | 5               | 7                     | 12            |                     |
| <b>Systolic blood pressure (mmHg)</b>  |                 |                       |               |                     |
| - N                                    | 14              | 12                    | 26            | 0.564 <sup>*2</sup> |
| - Mean +/- SD                          | 130.0 +/-13.5   | 129.4 +/-21.4         | 129.7 +/-17.2 |                     |
| - Median                               | 130.0           | 130.0                 | 130.0         |                     |
| - p25, p75                             | 125.0, 140.0    | 119.0, 135.0          | 120.0, 140.0  |                     |
| - Min, Max                             | 100.0, 153.0    | 90.0, 175.0           | 90.0, 175.0   |                     |
| - Missing                              | 5               | 7                     | 12            |                     |
| <b>Diastolic blood pressure (mmHg)</b> |                 |                       |               |                     |
| - N                                    | 14              | 12                    | 26            | 0.345 <sup>*2</sup> |
| - Mean +/- SD                          | 83.1 +/-8.0     | 78.8 +/-11.2          | 81.1 +/-9.7   |                     |
| - Median                               | 82.5            | 80.0                  | 80.0          |                     |
| - p25, p75                             | 80.0, 85.0      | 72.5, 90.0            | 77.0, 90.0    |                     |
| - Min, Max                             | 70.0, 100.0     | 60.0, 93.0            | 60.0, 100.0   |                     |
| - Missing                              | 5               | 7                     | 12            |                     |

<sup>\*2</sup> = U-test, two-sided

### 10.6.1.2 Physical examination

Table 10.6.5: Physical examination day 7 (FAS)

|                      | Placebo<br>N=19 | Dexamethasone<br>N=19 | Total<br>N=38 | p-value              |
|----------------------|-----------------|-----------------------|---------------|----------------------|
| General appearance   |                 |                       |               |                      |
| - normal             | 15 ( 83.3%)     | 13 ( 68.4%)           | 28 ( 75.7%)   | 0.291 * <sup>1</sup> |
| - abnormal           | 3 ( 16.7%)      | 6 ( 31.6%)            | 9 ( 24.3%)    |                      |
| - Missing            | 1               | 0                     | 1             |                      |
| Head & Neck          |                 |                       |               |                      |
| - normal             | 18 (100.0%)     | 17 ( 89.5%)           | 35 ( 94.6%)   | 0.157 * <sup>1</sup> |
| - abnormal           | 0 ( 0.0%)       | 2 ( 10.5%)            | 2 ( 5.4%)     |                      |
| - Missing            | 1               | 0                     | 1             |                      |
| Eyes & Ears          |                 |                       |               |                      |
| - normal             | 17 ( 94.4%)     | 15 ( 78.9%)           | 32 ( 86.5%)   | 0.168 * <sup>1</sup> |
| - abnormal           | 1 ( 5.6%)       | 4 ( 21.1%)            | 5 ( 13.5%)    |                      |
| - Missing            | 1               | 0                     | 1             |                      |
| Nose & Throat        |                 |                       |               |                      |
| - normal             | 17 ( 94.4%)     | 18 ( 94.7%)           | 35 ( 94.6%)   | 0.969 * <sup>1</sup> |
| - abnormal           | 1 ( 5.6%)       | 1 ( 5.3%)             | 2 ( 5.4%)     |                      |
| - Missing            | 1               | 0                     | 1             |                      |
| Chest                |                 |                       |               |                      |
| - normal             | 15 ( 83.3%)     | 19 (100.0%)           | 34 ( 91.9%)   | 0.063 * <sup>1</sup> |
| - abnormal           | 3 ( 16.7%)      | 0 ( 0.0%)             | 3 ( 8.1%)     |                      |
| - Missing            | 1               | 0                     | 1             |                      |
| Lungs                |                 |                       |               |                      |
| - normal             | 14 ( 77.8%)     | 18 ( 94.7%)           | 32 ( 86.5%)   | 0.132 * <sup>1</sup> |
| - abnormal           | 4 ( 22.2%)      | 1 ( 5.3%)             | 5 ( 13.5%)    |                      |
| - Missing            | 1               | 0                     | 1             |                      |
| Heart                |                 |                       |               |                      |
| - normal             | 16 ( 88.9%)     | 19 (100.0%)           | 35 ( 94.6%)   | 0.135 * <sup>1</sup> |
| - abnormal           | 2 ( 11.1%)      | 0 ( 0.0%)             | 2 ( 5.4%)     |                      |
| - Missing            | 1               | 0                     | 1             |                      |
| Abdomen              |                 |                       |               |                      |
| - normal             | 17 ( 94.4%)     | 17 ( 89.5%)           | 34 ( 91.9%)   | 0.580 * <sup>1</sup> |
| - abnormal           | 1 ( 5.6%)       | 2 ( 10.5%)            | 3 ( 8.1%)     |                      |
| - Missing            | 1               | 0                     | 1             |                      |
| Extremities & Joints |                 |                       |               |                      |
| - normal             | 14 ( 77.8%)     | 18 ( 94.7%)           | 32 ( 86.5%)   | 0.132 * <sup>1</sup> |
| - abnormal           | 4 ( 22.2%)      | 1 ( 5.3%)             | 5 ( 13.5%)    |                      |
| - Missing            | 1               | 0                     | 1             |                      |
| Lymph Nodes          |                 |                       |               |                      |
| - normal             | 18 (100.0%)     | 19 (100.0%)           | 37 (100.0%)   |                      |
| - Missing            | 1               | 0                     | 1             |                      |
| Skin                 |                 |                       |               |                      |
| - normal             | 13 ( 72.2%)     | 17 ( 89.5%)           | 30 ( 81.1%)   | 0.181 * <sup>1</sup> |
| - abnormal           | 5 ( 27.8%)      | 2 ( 10.5%)            | 7 ( 18.9%)    |                      |
| - Missing            | 1               | 0                     | 1             |                      |

\*<sup>2</sup> = U-test, two-sided

**Table 10.6.6: Physical examination discharge/day 30 (FAS)**

|                      | Placebo<br>N=19 | Dexamethasone<br>N=19 | Total<br>N=38 | p-value              |
|----------------------|-----------------|-----------------------|---------------|----------------------|
| General appearance   |                 |                       |               |                      |
| - normal             | 16 ( 88.9%)     | 16 ( 94.1%)           | 32 ( 91.4%)   | 0.581 * <sup>1</sup> |
| - abnormal           | 2 ( 11.1%)      | 1 ( 5.9%)             | 3 ( 8.6%)     |                      |
| - Missing            | 1               | 2                     | 3             |                      |
| Head & Neck          |                 |                       |               |                      |
| - normal             | 18 (100.0%)     | 16 ( 94.1%)           | 34 ( 97.1%)   | 0.296 * <sup>1</sup> |
| - abnormal           | 0 ( 0.0%)       | 1 ( 5.9%)             | 1 ( 2.9%)     |                      |
| - Missing            | 1               | 2                     | 3             |                      |
| Eyes & Ears          |                 |                       |               |                      |
| - normal             | 18 (100.0%)     | 16 ( 94.1%)           | 34 ( 97.1%)   | 0.296 * <sup>1</sup> |
| - abnormal           | 0 ( 0.0%)       | 1 ( 5.9%)             | 1 ( 2.9%)     |                      |
| - Missing            | 1               | 2                     | 3             |                      |
| Nose & Throat        |                 |                       |               |                      |
| - normal             | 16 ( 88.9%)     | 16 ( 94.1%)           | 32 ( 91.4%)   | 0.581 * <sup>1</sup> |
| - abnormal           | 2 ( 11.1%)      | 1 ( 5.9%)             | 3 ( 8.6%)     |                      |
| - Missing            | 1               | 2                     | 3             |                      |
| Chest                |                 |                       |               |                      |
| - normal             | 17 ( 94.4%)     | 17 (100.0%)           | 34 ( 97.1%)   | 0.324 * <sup>1</sup> |
| - abnormal           | 1 ( 5.6%)       | 0 ( 0.0%)             | 1 ( 2.9%)     |                      |
| - Missing            | 1               | 2                     | 3             |                      |
| Lungs                |                 |                       |               |                      |
| - normal             | 16 ( 88.9%)     | 16 ( 94.1%)           | 32 ( 91.4%)   | 0.581 * <sup>1</sup> |
| - abnormal           | 2 ( 11.1%)      | 1 ( 5.9%)             | 3 ( 8.6%)     |                      |
| - Missing            | 1               | 2                     | 3             |                      |
| Heart                |                 |                       |               |                      |
| - normal             | 15 ( 83.3%)     | 17 (100.0%)           | 32 ( 91.4%)   | 0.078 * <sup>1</sup> |
| - abnormal           | 3 ( 16.7%)      | 0 ( 0.0%)             | 3 ( 8.6%)     |                      |
| - Missing            | 1               | 2                     | 3             |                      |
| Abdomen              |                 |                       |               |                      |
| - normal             | 18 (100.0%)     | 17 (100.0%)           | 35 (100.0%)   |                      |
| - Missing            | 1               | 2                     | 3             |                      |
| Extremities & Joints |                 |                       |               |                      |
| - normal             | 17 ( 94.4%)     | 16 ( 94.1%)           | 33 ( 94.3%)   | 0.967 * <sup>1</sup> |
| - abnormal           | 1 ( 5.6%)       | 1 ( 5.9%)             | 2 ( 5.7%)     |                      |
| - Missing            | 1               | 2                     | 3             |                      |
| Lymph Nodes          |                 |                       |               |                      |
| - normal             | 18 (100.0%)     | 17 (100.0%)           | 35 (100.0%)   |                      |
| - Missing            | 1               | 2                     | 3             |                      |
| Skin                 |                 |                       |               |                      |
| - normal             | 17 ( 94.4%)     | 15 ( 88.2%)           | 32 ( 91.4%)   | 0.512 * <sup>1</sup> |
| - abnormal           | 1 ( 5.6%)       | 2 ( 11.8%)            | 3 ( 8.6%)     |                      |
| - Missing            | 1               | 2                     | 3             |                      |

\*<sup>1</sup> = Chi<sup>2</sup>-test, two-sided

**Table 10.6.7: Physical examination month 6 (FAS)**

|                      | <b>Placebo<br/>N=19</b> | <b>Dexamethasone<br/>N=19</b> | <b>Total<br/>N=38</b> | <b>p-value</b>       |
|----------------------|-------------------------|-------------------------------|-----------------------|----------------------|
| General appearance   |                         |                               |                       |                      |
| - normal             | 14 ( 82.4%)             | 13 (100.0%)                   | 27 ( 90.0%)           | 0.110 * <sup>1</sup> |
| - abnormal           | 3 ( 17.6%)              | 0 ( 0.0%)                     | 3 ( 10.0%)            |                      |
| - Missing            | 2                       | 6                             | 8                     |                      |
| Head & Neck          |                         |                               |                       |                      |
| - normal             | 15 ( 88.2%)             | 12 ( 92.3%)                   | 27 ( 90.0%)           | 0.665 * <sup>1</sup> |
| - abnormal           | 1 ( 5.9%)               | 1 ( 7.7%)                     | 2 ( 6.7%)             |                      |
| - not done           | 1 ( 5.9%)               | 0 ( 0.0%)                     | 1 ( 3.3%)             |                      |
| - Missing            | 2                       | 6                             | 8                     |                      |
| Eyes & Ears          |                         |                               |                       |                      |
| - normal             | 14 ( 82.4%)             | 12 ( 92.3%)                   | 26 ( 86.7%)           | 0.427 * <sup>1</sup> |
| - abnormal           | 3 ( 17.6%)              | 1 ( 7.7%)                     | 4 ( 13.3%)            |                      |
| - Missing            | 2                       | 6                             | 8                     |                      |
| Nose & Throat        |                         |                               |                       |                      |
| - normal             | 14 ( 82.4%)             | 13 (100.0%)                   | 27 ( 90.0%)           | 0.110 * <sup>1</sup> |
| - abnormal           | 3 ( 17.6%)              | 0 ( 0.0%)                     | 3 ( 10.0%)            |                      |
| - Missing            | 2                       | 6                             | 8                     |                      |
| Chest                |                         |                               |                       |                      |
| - normal             | 17 (100.0%)             | 13 (100.0%)                   | 30 (100.0%)           |                      |
| - Missing            | 2                       | 6                             | 8                     |                      |
| Lungs                |                         |                               |                       |                      |
| - normal             | 16 ( 94.1%)             | 13 (100.0%)                   | 29 ( 96.7%)           | 0.374 * <sup>1</sup> |
| - abnormal           | 1 ( 5.9%)               | 0 ( 0.0%)                     | 1 ( 3.3%)             |                      |
| - Missing            | 2                       | 6                             | 8                     |                      |
| Heart                |                         |                               |                       |                      |
| - normal             | 14 ( 82.4%)             | 13 (100.0%)                   | 27 ( 90.0%)           | 0.110 * <sup>1</sup> |
| - abnormal           | 3 ( 17.6%)              | 0 ( 0.0%)                     | 3 ( 10.0%)            |                      |
| - Missing            | 2                       | 6                             | 8                     |                      |
| Abdomen              |                         |                               |                       |                      |
| - normal             | 14 ( 82.4%)             | 13 (100.0%)                   | 27 ( 90.0%)           | 0.280 * <sup>1</sup> |
| - abnormal           | 2 ( 11.8%)              | 0 ( 0.0%)                     | 2 ( 6.7%)             |                      |
| - not done           | 1 ( 5.9%)               | 0 ( 0.0%)                     | 1 ( 3.3%)             |                      |
| - Missing            | 2                       | 6                             | 8                     |                      |
| Extremities & Joints |                         |                               |                       |                      |
| - normal             | 14 ( 82.4%)             | 12 ( 92.3%)                   | 26 ( 86.7%)           | 0.427 * <sup>1</sup> |
| - abnormal           | 3 ( 17.6%)              | 1 ( 7.7%)                     | 4 ( 13.3%)            |                      |
| - Missing            | 2                       | 6                             | 8                     |                      |
| Lymph Nodes          |                         |                               |                       |                      |
| - normal             | 16 ( 94.1%)             | 13 (100.0%)                   | 29 ( 96.7%)           | 0.374 * <sup>1</sup> |
| - not done           | 1 ( 5.9%)               | 0 ( 0.0%)                     | 1 ( 3.3%)             |                      |
| - Missing            | 2                       | 6                             | 8                     |                      |
| Skin                 |                         |                               |                       |                      |
| - normal             | 14 ( 82.4%)             | 12 ( 92.3%)                   | 26 ( 86.7%)           | 0.427 * <sup>1</sup> |
| - abnormal           | 3 ( 17.6%)              | 1 ( 7.7%)                     | 4 ( 13.3%)            |                      |
| - Missing            | 2                       | 6                             | 8                     |                      |

\*<sup>1</sup> = Chi<sup>2</sup>-test, two-sided



**Table 10.6.8: Physical examination month 12 (FAS)**

|                      | Placebo<br>N=19 | Dexamethasone<br>N=19 | Total<br>N=38 | p-value              |
|----------------------|-----------------|-----------------------|---------------|----------------------|
| General appearance   |                 |                       |               |                      |
| - normal             | 14 (100.0%)     | 12 (100.0%)           | 26 (100.0%)   |                      |
| - Missing            | 5               | 7                     | 12            |                      |
| Head & Neck          |                 |                       |               |                      |
| - normal             | 13 (92.9%)      | 12 (100.0%)           | 25 (96.2%)    | 0.345 * <sup>1</sup> |
| - abnormal           | 1 (7.1%)        | 0 (0.0%)              | 1 (3.8%)      |                      |
| - Missing            | 5               | 7                     | 12            |                      |
| Eyes & Ears          |                 |                       |               |                      |
| - normal             | 13 (92.9%)      | 10 (83.3%)            | 23 (88.5%)    | 0.449 * <sup>1</sup> |
| - abnormal           | 1 (7.1%)        | 2 (16.7%)             | 3 (11.5%)     |                      |
| - Missing            | 5               | 7                     | 12            |                      |
| Nose & Throat        |                 |                       |               |                      |
| - normal             | 14 (100.0%)     | 12 (100.0%)           | 26 (100.0%)   |                      |
| - Missing            | 5               | 7                     | 12            |                      |
| Chest                |                 |                       |               |                      |
| - normal             | 14 (100.0%)     | 12 (100.0%)           | 26 (100.0%)   |                      |
| - Missing            | 5               | 7                     | 12            |                      |
| Lungs                |                 |                       |               |                      |
| - normal             | 14 (100.0%)     | 12 (100.0%)           | 26 (100.0%)   |                      |
| - Missing            | 5               | 7                     | 12            |                      |
| Heart                |                 |                       |               |                      |
| - normal             | 12 (85.7%)      | 12 (100.0%)           | 24 (92.3%)    | 0.173 * <sup>1</sup> |
| - abnormal           | 2 (14.3%)       | 0 (0.0%)              | 2 (7.7%)      |                      |
| - Missing            | 5               | 7                     | 12            |                      |
| Abdomen              |                 |                       |               |                      |
| - normal             | 13 (92.9%)      | 12 (100.0%)           | 25 (96.2%)    | 0.345 * <sup>1</sup> |
| - abnormal           | 1 (7.1%)        | 0 (0.0%)              | 1 (3.8%)      |                      |
| - Missing            | 5               | 7                     | 12            |                      |
| Extremities & Joints |                 |                       |               |                      |
| - normal             | 12 (85.7%)      | 12 (100.0%)           | 24 (92.3%)    | 0.173 * <sup>1</sup> |
| - abnormal           | 2 (14.3%)       | 0 (0.0%)              | 2 (7.7%)      |                      |
| - Missing            | 5               | 7                     | 12            |                      |
| Lymph Nodes          |                 |                       |               |                      |
| - normal             | 14 (100.0%)     | 11 (91.7%)            | 25 (96.2%)    | 0.271 * <sup>1</sup> |
| - abnormal           | 0 (0.0%)        | 1 (8.3%)              | 1 (3.8%)      |                      |
| - Missing            | 5               | 7                     | 12            |                      |
| Skin                 |                 |                       |               |                      |
| - normal             | 13 (92.9%)      | 10 (83.3%)            | 23 (88.5%)    | 0.449 * <sup>1</sup> |
| - abnormal           | 1 (7.1%)        | 2 (16.7%)             | 3 (11.5%)     |                      |
| - Missing            | 5               | 7                     | 12            |                      |

\*<sup>1</sup> = Chi<sup>2</sup> -test, two-sided

## 10.6.2 Adverse events

**Table 10.6.9: Patients with (serious) adverse events**

|                                  | Placebo |                    | Dexamethasone |                    | Total |                    |
|----------------------------------|---------|--------------------|---------------|--------------------|-------|--------------------|
|                                  | # AE    | # patients with AE | # AE          | # patients with AE | # AE  | # patients with AE |
| Number of adverse events         | 72      | 14 ( 73.7%)        | 52            | 17 ( 89.5%)        | 124   | 31 ( 81.6%)        |
| Number of serious adverse events | 10      | 6 ( 31.6%)         | 9             | 5 ( 26.3%)         | 19    | 11 ( 28.9%)        |

**Table 10.6.10: Characteristics of serious adverse events**

|                                                        | Placebo |                    | Dexamethasone |                    | Total |                    |
|--------------------------------------------------------|---------|--------------------|---------------|--------------------|-------|--------------------|
|                                                        | # AE    | # patients with AE | # AE          | # patients with AE | # AE  | # patients with AE |
| MedDRA SOC term                                        |         |                    |               |                    |       |                    |
| - General disorders and administration site conditions | 1       | 1 ( 5.3%)          | 1             | 1 ( 5.3%)          | 2     | 2 ( 5.3%)          |
| - Hepatobiliary disorders                              | 1       | 1 ( 5.3%)          | 0             | 0 ( 0.0%)          | 1     | 1 ( 2.6%)          |
| - Infections and infestations                          | 6       | 5 ( 26.3%)         | 1             | 1 ( 5.3%)          | 7     | 6 ( 15.8%)         |
| - Investigations                                       | 0       | 0 ( 0.0%)          | 1             | 1 ( 5.3%)          | 1     | 1 ( 2.6%)          |
| - Renal and urinary disorders                          | 1       | 1 ( 5.3%)          | 1             | 1 ( 5.3%)          | 2     | 2 ( 5.3%)          |
| - Respiratory, thoracic and mediastinal disorders      | 0       | 0 ( 0.0%)          | 2             | 2 ( 10.5%)         | 2     | 2 ( 5.3%)          |
| - Skin and subcutaneous tissue disorders               | 0       | 0 ( 0.0%)          | 1             | 1 ( 5.3%)          | 1     | 1 ( 2.6%)          |
| - Surgical and medical procedures                      | 0       | 0 ( 0.0%)          | 2             | 1 ( 5.3%)          | 2     | 1 ( 2.6%)          |
| - Vascular disorders                                   | 1       | 1 ( 5.3%)          | 0             | 0 ( 0.0%)          | 1     | 1 ( 2.6%)          |
| Severity                                               |         |                    |               |                    |       |                    |
| - mild                                                 | 1       | 1 ( 5.3%)          | 1             | 1 ( 5.3%)          | 2     | 2 ( 5.3%)          |
| - moderate                                             | 2       | 2 ( 10.5%)         | 5             | 3 ( 15.8%)         | 7     | 5 ( 13.2%)         |
| - severe                                               | 7       | 3 ( 15.8%)         | 3             | 3 ( 15.8%)         | 10    | 6 ( 15.8%)         |
| Causality to study drug                                |         |                    |               |                    |       |                    |
| - none                                                 | 10      | 6 ( 31.6%)         | 5             | 4 ( 21.1%)         | 15    | 10 ( 26.3%)        |
| - unlikely                                             | 0       | 0 ( 0.0%)          | 3             | 1 ( 5.3%)          | 3     | 1 ( 2.6%)          |
| - not assessable                                       | 0       | 0 ( 0.0%)          | 1             | 1 ( 5.3%)          | 1     | 1 ( 2.6%)          |
| Outcome                                                |         |                    |               |                    |       |                    |
| - recovered completely                                 | 5       | 4 ( 21.1%)         | 2             | 1 ( 5.3%)          | 7     | 5 ( 13.2%)         |
| - recovered with sequelae                              | 0       | 0 ( 0.0%)          | 4             | 1 ( 5.3%)          | 4     | 1 ( 2.6%)          |
| - death                                                | 5       | 2 ( 10.5%)         | 1             | 1 ( 5.3%)          | 6     | 3 ( 7.9%)          |
| - unknown                                              | 0       | 0 ( 0.0%)          | 2             | 2 ( 10.5%)         | 2     | 2 ( 5.3%)          |

**Table 10.6.11: Characteristics of adverse events**

|                                                        | Placebo |                    | Dexamethasone |                    | Total |                    |
|--------------------------------------------------------|---------|--------------------|---------------|--------------------|-------|--------------------|
|                                                        | # AE    | # patients with AE | # AE          | # patients with AE | # AE  | # patients with AE |
| <b>MedDRA SOC term</b>                                 |         |                    |               |                    |       |                    |
| - Blood and lymphatic system disorders                 | 0       | 0 ( 0.0%)          | 2             | 2 ( 10.5%)         | 2     | 2 ( 5.3%)          |
| - Cardiac disorders                                    | 1       | 1 ( 5.3%)          | 1             | 1 ( 5.3%)          | 2     | 2 ( 5.3%)          |
| - Congenital, familial and genetic disorders           | 1       | 1 ( 5.3%)          | 0             | 0 ( 0.0%)          | 1     | 1 ( 2.6%)          |
| - Ear and labyrinth disorders                          | 0       | 0 ( 0.0%)          | 1             | 1 ( 5.3%)          | 1     | 1 ( 2.6%)          |
| - Endocrine disorders                                  | 0       | 0 ( 0.0%)          | 1             | 1 ( 5.3%)          | 1     | 1 ( 2.6%)          |
| - Eye disorders                                        | 1       | 1 ( 5.3%)          | 3             | 3 ( 15.8%)         | 4     | 4 ( 10.5%)         |
| - Gastrointestinal disorders                           | 5       | 3 ( 15.8%)         | 0             | 0 ( 0.0%)          | 5     | 3 ( 7.9%)          |
| - General disorders and administration site conditions | 13      | 7 ( 36.8%)         | 8             | 7 ( 36.8%)         | 21    | 14 ( 36.8%)        |
| - Hepatobiliary disorders                              | 1       | 1 ( 5.3%)          | 0             | 0 ( 0.0%)          | 1     | 1 ( 2.6%)          |
| - Infections and infestations                          | 13      | 9 ( 47.4%)         | 5             | 5 ( 26.3%)         | 18    | 14 ( 36.8%)        |
| - Injury, poisoning and procedural complications       | 2       | 2 ( 10.5%)         | 2             | 1 ( 5.3%)          | 4     | 3 ( 7.9%)          |
| - Investigations                                       | 8       | 5 ( 26.3%)         | 3             | 2 ( 10.5%)         | 11    | 7 ( 18.4%)         |
| - Metabolism and nutrition disorders                   | 3       | 3 ( 15.8%)         | 1             | 1 ( 5.3%)          | 4     | 4 ( 10.5%)         |
| - Musculoskeletal and connective tissue disorders      | 3       | 3 ( 15.8%)         | 3             | 1 ( 5.3%)          | 6     | 4 ( 10.5%)         |
| - Nervous system disorders                             | 5       | 5 ( 26.3%)         | 8             | 6 ( 31.6%)         | 13    | 11 ( 28.9%)        |
| - Psychiatric disorders                                | 2       | 2 ( 10.5%)         | 2             | 2 ( 10.5%)         | 4     | 4 ( 10.5%)         |
| - Renal and urinary disorders                          | 1       | 1 ( 5.3%)          | 2             | 2 ( 10.5%)         | 3     | 3 ( 7.9%)          |
| - Respiratory, thoracic and mediastinal disorders      | 2       | 2 ( 10.5%)         | 3             | 3 ( 15.8%)         | 5     | 5 ( 13.2%)         |
| - Skin and subcutaneous tissue disorders               | 4       | 4 ( 21.1%)         | 2             | 2 ( 10.5%)         | 6     | 6 ( 15.8%)         |
| - Social circumstances                                 | 0       | 0 ( 0.0%)          | 1             | 1 ( 5.3%)          | 1     | 1 ( 2.6%)          |
| - Surgical and medical procedures                      | 3       | 1 ( 5.3%)          | 2             | 1 ( 5.3%)          | 5     | 2 ( 5.3%)          |
| - Vascular disorders                                   | 4       | 4 ( 21.1%)         | 2             | 2 ( 10.5%)         | 6     | 6 ( 15.8%)         |
| <b>Severity</b>                                        |         |                    |               |                    |       |                    |
| - mild                                                 | 38      | 10 ( 52.6%)        | 28            | 15 ( 78.9%)        | 66    | 25 ( 65.8%)        |
| - moderate                                             | 25      | 8 ( 42.1%)         | 18            | 9 ( 47.4%)         | 43    | 17 ( 44.7%)        |
| - severe                                               | 9       | 5 ( 26.3%)         | 6             | 5 ( 26.3%)         | 15    | 10 ( 26.3%)        |
| <b>Causality to study drug</b>                         |         |                    |               |                    |       |                    |
| - none                                                 | 58      | 12 ( 63.2%)        | 38            | 14 ( 73.7%)        | 96    | 26 ( 68.4%)        |
| - unlikely                                             | 10      | 4 ( 21.1%)         | 9             | 5 ( 26.3%)         | 19    | 9 ( 23.7%)         |
| - possible                                             | 2       | 2 ( 10.5%)         | 3             | 3 ( 15.8%)         | 5     | 5 ( 13.2%)         |
| - probable                                             | 0       | 0 ( 0.0%)          | 1             | 1 ( 5.3%)          | 1     | 1 ( 2.6%)          |
| - not assessable                                       | 2       | 1 ( 5.3%)          | 1             | 1 ( 5.3%)          | 3     | 2 ( 5.3%)          |
| <b>Outcome</b>                                         |         |                    |               |                    |       |                    |
| - ongoing                                              | 12      | 5 ( 26.3%)         | 14            | 8 ( 42.1%)         | 26    | 13 ( 34.2%)        |
| - recovered completely                                 | 50      | 12 ( 63.2%)        | 29            | 13 ( 68.4%)        | 79    | 25 ( 65.8%)        |
| - recovered with sequelae                              | 1       | 1 ( 5.3%)          | 4             | 1 ( 5.3%)          | 5     | 2 ( 5.3%)          |
| - death                                                | 5       | 2 ( 10.5%)         | 1             | 1 ( 5.3%)          | 6     | 3 ( 7.9%)          |
| - unknown                                              | 4       | 2 ( 10.5%)         | 4             | 4 ( 21.1%)         | 8     | 6 ( 15.8%)         |

### 10.6.2.1 Adverse events according to severity

Table 10.6.12: System Organ Class (SOC) according to severity - group: Placebo

| System organ class                                     | # AE | mild                  |   | moderate              |   | severe                |   | Total<br># patients<br>with AE |
|--------------------------------------------------------|------|-----------------------|---|-----------------------|---|-----------------------|---|--------------------------------|
|                                                        |      | # patients<br>with AE | % | # patients<br>with AE | % | # patients<br>with AE | % |                                |
| - Cardiac disorders                                    | 0    | 0 (0.0%)              |   | 1 (5.3%)              |   | 0 (0.0%)              |   | 1 (5.3%)                       |
| - Congenital, familial and genetic disorders           | 1    | 1 (5.3%)              |   | 0 (0.0%)              |   | 0 (0.0%)              |   | 1 (5.3%)                       |
| - Eye disorders                                        | 1    | 1 (5.3%)              |   | 0 (0.0%)              |   | 0 (0.0%)              |   | 1 (5.3%)                       |
| - Gastrointestinal disorders                           | 5    | 3 (15.8%)             |   | 0 (0.0%)              |   | 0 (0.0%)              |   | 3 (15.8%)                      |
| - General disorders and administration site conditions | 6    | 2 (10.5%)             |   | 5 (26.3%)             |   | 2 (10.5%)             |   | 7 (36.8%)                      |
| - Hepatobiliary disorders                              | 0    | 0 (0.0%)              |   | 0 (0.0%)              |   | 1 (5.3%)              |   | 1 (5.3%)                       |
| - Infections and infestations                          | 4    | 3 (15.8%)             |   | 6 (26.3%)             |   | 3 (10.5%)             |   | 9 (47.4%)                      |
| - Injury, poisoning and procedural complications       | 2    | 2 (10.5%)             |   | 0 (0.0%)              |   | 0 (0.0%)              |   | 2 (10.5%)                      |
| - Investigations                                       | 7    | 5 (26.3%)             |   | 1 (5.3%)              |   | 0 (0.0%)              |   | 8 (42.1%)                      |
| - Metabolism and nutrition disorders                   | 2    | 2 (10.5%)             |   | 1 (5.3%)              |   | 0 (0.0%)              |   | 3 (15.8%)                      |
| - Musculoskeletal and connective tissue disorders      | 1    | 1 (5.3%)              |   | 2 (10.5%)             |   | 0 (0.0%)              |   | 3 (15.8%)                      |
| - Nervous system disorders                             | 3    | 3 (15.8%)             |   | 2 (10.5%)             |   | 0 (0.0%)              |   | 5 (26.3%)                      |
| - Psychiatric disorders                                | 1    | 1 (5.3%)              |   | 1 (5.3%)              |   | 0 (0.0%)              |   | 2 (10.5%)                      |
| - Renal and urinary disorders                          | 0    | 0 (0.0%)              |   | 0 (0.0%)              |   | 1 (5.3%)              |   | 1 (5.3%)                       |
| - Respiratory, thoracic and mediastinal disorders      | 1    | 1 (5.3%)              |   | 1 (5.3%)              |   | 0 (0.0%)              |   | 2 (10.5%)                      |
| - Skin and subcutaneous tissue disorders               | 3    | 3 (15.8%)             |   | 1 (5.3%)              |   | 0 (0.0%)              |   | 4 (21.1%)                      |
| - Surgical and medical procedures                      | 0    | 0 (0.0%)              |   | 2 (10.5%)             |   | 1 (5.3%)              |   | 3 (15.8%)                      |
| - Vascular disorders                                   | 1    | 1 (5.3%)              |   | 2 (10.5%)             |   | 1 (5.3%)              |   | 4 (21.1%)                      |

**Table 10.6.13: System Organ Class (SOC) according to severity - group: Dexamethasone**

| System organ class                                     | mild |                       | moderate |                       | severe |                       | Total<br># patients<br>with AE |
|--------------------------------------------------------|------|-----------------------|----------|-----------------------|--------|-----------------------|--------------------------------|
|                                                        | #AE  | # patients<br>with AE | #AE      | # patients<br>with AE | #AE    | # patients<br>with AE |                                |
| - Blood and lymphatic system disorders                 | 1    | 1 (5.3%)              | 1        | 1 (5.3%)              | 0      | 0 (0.0%)              | 2 (10.5%)                      |
| - Cardiac disorders                                    | 1    | 1 (5.3%)              | 0        | 0 (0.0%)              | 0      | 0 (0.0%)              | 1 (5.3%)                       |
| - Ear and labyrinth disorders                          | 1    | 1 (5.3%)              | 0        | 0 (0.0%)              | 0      | 0 (0.0%)              | 1 (5.3%)                       |
| - Endocrine disorders                                  | 0    | 0 (0.0%)              | 1        | 1 (5.3%)              | 0      | 0 (0.0%)              | 1 (5.3%)                       |
| - Eye disorders                                        | 3    | 3 (15.8%)             | 0        | 0 (0.0%)              | 0      | 0 (0.0%)              | 3 (15.8%)                      |
| - General disorders and administration site conditions | 6    | 5 (26.3%)             | 2        | 2 (10.5%)             | 0      | 0 (0.0%)              | 7 (36.8%)                      |
| - Infections and infestations                          | 0    | 0 (0.0%)              | 3        | 3 (15.8%)             | 2      | 2 (10.5%)             | 5 (26.3%)                      |
| - Injury, poisoning and procedural complications       | 0    | 0 (0.0%)              | 2        | 1 (5.3%)              | 0      | 0 (0.0%)              | 2 (10.5%)                      |
| - Investigations                                       | 3    | 2 (10.5%)             | 0        | 0 (0.0%)              | 0      | 0 (0.0%)              | 3 (15.8%)                      |
| - Metabolism and nutrition disorders                   | 1    | 1 (5.3%)              | 0        | 0 (0.0%)              | 0      | 0 (0.0%)              | 1 (5.3%)                       |
| - Musculoskeletal and connective tissue disorders      | 1    | 1 (5.3%)              | 2        | 1 (5.3%)              | 0      | 0 (0.0%)              | 3 (15.8%)                      |
| - Nervous system disorders                             | 4    | 4 (21.1%)             | 3        | 3 (15.8%)             | 1      | 1 (5.3%)              | 6 (31.6%)                      |
| - Psychiatric disorders                                | 2    | 2 (10.5%)             | 0        | 0 (0.0%)              | 0      | 0 (0.0%)              | 2 (10.5%)                      |
| - Renal and urinary disorders                          | 1    | 1 (5.3%)              | 0        | 0 (0.0%)              | 1      | 1 (5.3%)              | 2 (10.5%)                      |
| - Respiratory, thoracic and mediastinal disorders      | 0    | 0 (0.0%)              | 1        | 1 (5.3%)              | 2      | 2 (10.5%)             | 3 (15.8%)                      |
| - Skin and subcutaneous tissue disorders               | 1    | 1 (5.3%)              | 1        | 1 (5.3%)              | 0      | 0 (0.0%)              | 2 (10.5%)                      |
| - Social circumstances                                 | 1    | 1 (5.3%)              | 0        | 0 (0.0%)              | 0      | 0 (0.0%)              | 1 (5.3%)                       |
| - Surgical and medical procedures                      | 0    | 0 (0.0%)              | 2        | 1 (5.3%)              | 0      | 0 (0.0%)              | 2 (10.5%)                      |
| - Vascular disorders                                   | 2    | 2 (10.5%)             | 0        | 0 (0.0%)              | 0      | 0 (0.0%)              | 2 (10.5%)                      |

**Table 10.6.14: SOC/PT according to severity - group: Placebo**

|                                                           | #AE | mild<br># patients<br>with AE | moderate<br># patients<br>with AE | severe<br># patients<br>with AE | Total<br># patients<br>with AE |
|-----------------------------------------------------------|-----|-------------------------------|-----------------------------------|---------------------------------|--------------------------------|
| SOC: Cardiac disorders                                    |     |                               |                                   |                                 |                                |
| - Atrial fibrillation                                     | 0   | 0 (0.0%)                      | 1 (5.3%)                          | 0 (0.0%)                        | 1 (5.3%)                       |
| SOC: Congenital_ familial and genetic disorders           |     |                               |                                   |                                 |                                |
| - Hydrocele                                               | 1   | 1 (5.3%)                      | 0 (0.0%)                          | 0 (0.0%)                        | 1 (5.3%)                       |
| SOC: Eye disorders                                        |     |                               |                                   |                                 |                                |
| - Visual impairment                                       | 1   | 1 (5.3%)                      | 0 (0.0%)                          | 0 (0.0%)                        | 1 (5.3%)                       |
| SOC: Gastrointestinal disorders                           |     |                               |                                   |                                 |                                |
| - Constipation                                            | 1   | 1 (5.3%)                      | 0 (0.0%)                          | 0 (0.0%)                        | 1 (5.3%)                       |
| - Diarrhoea                                               | 1   | 1 (5.3%)                      | 0 (0.0%)                          | 0 (0.0%)                        | 1 (5.3%)                       |
| - Nausea                                                  | 1   | 1 (5.3%)                      | 0 (0.0%)                          | 0 (0.0%)                        | 1 (5.3%)                       |
| - Vomiting                                                | 2   | 2 (10.5%)                     | 0 (0.0%)                          | 0 (0.0%)                        | 2 (10.5%)                      |
| SOC: General disorders and administration site conditions |     |                               |                                   |                                 |                                |
| - Condition aggravated                                    | 0   | 0 (0.0%)                      | 0 (0.0%)                          | 1 (5.3%)                        | 1 (5.3%)                       |
| - General physical health deterioration                   | 0   | 0 (0.0%)                      | 0 (0.0%)                          | 1 (5.3%)                        | 1 (5.3%)                       |
| - Infusion site extravasation                             | 0   | 0 (0.0%)                      | 1 (5.3%)                          | 0 (0.0%)                        | 1 (5.3%)                       |
| - Local swelling                                          | 1   | 1 (5.3%)                      | 0 (0.0%)                          | 0 (0.0%)                        | 1 (5.3%)                       |
| - Oedema peripheral                                       | 1   | 1 (5.3%)                      | 0 (0.0%)                          | 0 (0.0%)                        | 1 (5.3%)                       |
| - Pain                                                    | 1   | 1 (5.3%)                      | 0 (0.0%)                          | 0 (0.0%)                        | 1 (5.3%)                       |
| - Pyrexia                                                 | 3   | 1 (5.3%)                      | 4 (21.1%)                         | 0 (0.0%)                        | 7 (42.1%)                      |
| SOC: Hepatobiliary disorders                              |     |                               |                                   |                                 |                                |
| - Cholangitis                                             | 0   | 0 (0.0%)                      | 0 (0.0%)                          | 1 (5.3%)                        | 1 (5.3%)                       |
| SOC: Infections and infestations                          |     |                               |                                   |                                 |                                |
| - Abscess                                                 | 0   | 0 (0.0%)                      | 0 (0.0%)                          | 1 (5.3%)                        | 1 (5.3%)                       |
| - Bacteraemia                                             | 1   | 1 (5.3%)                      | 0 (0.0%)                          | 0 (0.0%)                        | 1 (5.3%)                       |
| - Bacterial infection                                     | 1   | 1 (5.3%)                      | 0 (0.0%)                          | 0 (0.0%)                        | 1 (5.3%)                       |
| - Brain abscess                                           | 0   | 0 (0.0%)                      | 1 (5.3%)                          | 0 (0.0%)                        | 1 (5.3%)                       |
| - Bronchitis                                              | 0   | 0 (0.0%)                      | 1 (5.3%)                          | 0 (0.0%)                        | 1 (5.3%)                       |
| - Bronchopneumonia                                        | 0   | 0 (0.0%)                      | 2 (10.5%)                         | 0 (0.0%)                        | 2 (10.5%)                      |
| - Herpes simplex                                          | 1   | 1 (5.3%)                      | 1 (5.3%)                          | 0 (0.0%)                        | 2 (10.5%)                      |
| - Pneumonia                                               | 0   | 0 (0.0%)                      | 1 (5.3%)                          | 0 (0.0%)                        | 1 (5.3%)                       |
| - Sepsis                                                  | 0   | 0 (0.0%)                      | 0 (0.0%)                          | 2 (10.5%)                       | 2 (10.5%)                      |
| - Urinary tract infection                                 | 1   | 1 (5.3%)                      | 0 (0.0%)                          | 0 (0.0%)                        | 1 (5.3%)                       |

|                                                      | #AE | mild<br># patients<br>with AE | moderate<br># patients<br>with AE | severe<br># patients<br>with AE | Total<br># patients<br>with AE |
|------------------------------------------------------|-----|-------------------------------|-----------------------------------|---------------------------------|--------------------------------|
| SOC: Injury_ poisoning and procedural complications  |     |                               |                                   |                                 |                                |
| - Fall                                               | 2   | 2 (10.5%)                     | 0 (0.0%)                          | 0 (0.0%)                        | 2 (10.5%)                      |
| SOC: Investigations                                  |     |                               |                                   |                                 |                                |
| - Alanine aminotransferase increased                 | 0   | 0 (0.0%)                      | 1 (5.3%)                          | 0 (0.0%)                        | 1 (5.3%)                       |
| - Blood acid phosphatase increased                   | 1   | 1 (5.3%)                      | 0 (0.0%)                          | 0 (0.0%)                        | 1 (5.3%)                       |
| - Blood creatinine increased                         | 1   | 1 (5.3%)                      | 0 (0.0%)                          | 0 (0.0%)                        | 1 (5.3%)                       |
| - Blood culture positive                             | 1   | 1 (5.3%)                      | 0 (0.0%)                          | 0 (0.0%)                        | 1 (5.3%)                       |
| - Body temperature increased                         | 1   | 1 (5.3%)                      | 0 (0.0%)                          | 0 (0.0%)                        | 1 (5.3%)                       |
| - C-reactive protein increased                       | 1   | 1 (5.3%)                      | 0 (0.0%)                          | 0 (0.0%)                        | 1 (5.3%)                       |
| - Lipase increased                                   | 1   | 1 (5.3%)                      | 0 (0.0%)                          | 0 (0.0%)                        | 1 (5.3%)                       |
| - Weight decreased                                   | 1   | 1 (5.3%)                      | 0 (0.0%)                          | 0 (0.0%)                        | 1 (5.3%)                       |
| SOC: Metabolism and nutrition disorders              |     |                               |                                   |                                 |                                |
| - Decreased appetite                                 | 1   | 1 (5.3%)                      | 0 (0.0%)                          | 0 (0.0%)                        | 1 (5.3%)                       |
| - Hypokalaemia                                       | 1   | 1 (5.3%)                      | 1 (5.3%)                          | 0 (0.0%)                        | 2 (10.5%)                      |
| SOC: Musculoskeletal and connective tissue disorders |     |                               |                                   |                                 |                                |
| - Muscle contracture                                 | 0   | 0 (0.0%)                      | 1 (5.3%)                          | 0 (0.0%)                        | 1 (5.3%)                       |
| - Rhabdomyolysis                                     | 1   | 1 (5.3%)                      | 0 (0.0%)                          | 0 (0.0%)                        | 1 (5.3%)                       |
| - Rotator cuff syndrome                              | 0   | 0 (0.0%)                      | 1 (5.3%)                          | 0 (0.0%)                        | 1 (5.3%)                       |
| SOC: Nervous system disorders                        |     |                               |                                   |                                 |                                |
| - Anosmia                                            | 1   | 1 (5.3%)                      | 0 (0.0%)                          | 0 (0.0%)                        | 1 (5.3%)                       |
| - Convulsion                                         | 0   | 0 (0.0%)                      | 1 (5.3%)                          | 0 (0.0%)                        | 1 (5.3%)                       |
| - Grand mal convulsion                               | 0   | 0 (0.0%)                      | 1 (5.3%)                          | 0 (0.0%)                        | 1 (5.3%)                       |
| - Headache                                           | 1   | 1 (5.3%)                      | 0 (0.0%)                          | 0 (0.0%)                        | 1 (5.3%)                       |
| - Pleocytosis                                        | 1   | 1 (5.3%)                      | 0 (0.0%)                          | 0 (0.0%)                        | 1 (5.3%)                       |
| SOC: Psychiatric disorders                           |     |                               |                                   |                                 |                                |
| - Depression                                         | 0   | 0 (0.0%)                      | 1 (5.3%)                          | 0 (0.0%)                        | 1 (5.3%)                       |
| - Insomnia                                           | 1   | 1 (5.3%)                      | 0 (0.0%)                          | 0 (0.0%)                        | 1 (5.3%)                       |
| SOC: Renal and urinary disorders                     |     |                               |                                   |                                 |                                |
| - Renal failure                                      | 0   | 0 (0.0%)                      | 0 (0.0%)                          | 1 (5.3%)                        | 1 (5.3%)                       |
| SOC: Respiratory_ thoracic and mediastinal disorders |     |                               |                                   |                                 |                                |
| - Hiccups                                            | 1   | 1 (5.3%)                      | 0 (0.0%)                          | 0 (0.0%)                        | 1 (5.3%)                       |
| - Pulmonary embolism                                 | 0   | 0 (0.0%)                      | 1 (5.3%)                          | 0 (0.0%)                        | 1 (5.3%)                       |

|                                             | #AE | mild<br># patients<br>with AE | moderate<br># patients<br>with AE | severe<br># patients<br>with AE | Total<br># patients<br>with AE |
|---------------------------------------------|-----|-------------------------------|-----------------------------------|---------------------------------|--------------------------------|
| SOC: Skin and subcutaneous tissue disorders |     |                               |                                   |                                 |                                |
| - Drug eruption                             | 1   | 1 ( 5.3%)                     | 0                                 | 0 ( 0.0%)                       | 1 ( 5.3%)                      |
| - Erythema                                  | 1   | 1 ( 5.3%)                     | 0                                 | 0 ( 0.0%)                       | 1 ( 5.3%)                      |
| - Rash                                      | 1   | 1 ( 5.3%)                     | 0                                 | 0 ( 0.0%)                       | 1 ( 5.3%)                      |
| - Skin necrosis                             | 0   | 0 ( 0.0%)                     | 1 ( 5.3%)                         | 0 ( 0.0%)                       | 1 ( 5.3%)                      |
| SOC: Surgical and medical procedures        |     |                               |                                   |                                 |                                |
| - Endotracheal intubation                   | 0   | 0 ( 0.0%)                     | 0 ( 0.0%)                         | 1 ( 5.3%)                       | 1 ( 5.3%)                      |
| - Gastrostomy                               | 0   | 0 ( 0.0%)                     | 1 ( 5.3%)                         | 0 ( 0.0%)                       | 1 ( 5.3%)                      |
| - Tracheostomy                              | 0   | 0 ( 0.0%)                     | 1 ( 5.3%)                         | 0 ( 0.0%)                       | 1 ( 5.3%)                      |
| SOC: Vascular disorders                     |     |                               |                                   |                                 |                                |
| - Deep vein thrombosis                      | 0   | 0 ( 0.0%)                     | 1 ( 5.3%)                         | 0 ( 0.0%)                       | 1 ( 5.3%)                      |
| - Haematoma                                 | 1   | 1 ( 5.3%)                     | 0                                 | 0 ( 0.0%)                       | 1 ( 5.3%)                      |
| - Hypertension                              | 0   | 0 ( 0.0%)                     | 1 ( 5.3%)                         | 0 ( 0.0%)                       | 1 ( 5.3%)                      |
| - Thrombosis                                | 0   | 0 ( 0.0%)                     | 0 ( 0.0%)                         | 1 ( 5.3%)                       | 1 ( 5.3%)                      |



**Table 10.6.15: SOC/PT according to severity - group: Dexamethasone**

|                                                           | #AE | mild               |   | moderate           |   | severe             |   | Total              |   |
|-----------------------------------------------------------|-----|--------------------|---|--------------------|---|--------------------|---|--------------------|---|
|                                                           |     | # patients with AE | % | # patients with AE | % | # patients with AE | % | # patients with AE | % |
| SOC: Blood and lymphatic system disorders                 |     |                    |   |                    |   |                    |   |                    |   |
| - Leukocytosis                                            | 0   | 0 (0.0%)           |   | 1 (5.3%)           |   | 0 (0.0%)           |   | 1 (5.3%)           |   |
| - Lymphadenopathy                                         | 1   | 1 (5.3%)           |   | 0 (0.0%)           |   | 0 (0.0%)           |   | 1 (5.3%)           |   |
| SOC: Cardiac disorders                                    |     |                    |   |                    |   |                    |   |                    |   |
| - Arrhythmia                                              | 1   | 1 (5.3%)           |   | 0 (0.0%)           |   | 0 (0.0%)           |   | 1 (5.3%)           |   |
| SOC: Ear and labyrinth disorders                          |     |                    |   |                    |   |                    |   |                    |   |
| - Tinnitus                                                | 1   | 1 (5.3%)           |   | 0 (0.0%)           |   | 0 (0.0%)           |   | 1 (5.3%)           |   |
| SOC: Endocrine disorders                                  |     |                    |   |                    |   |                    |   |                    |   |
| - Diabetes insipidus                                      | 0   | 0 (0.0%)           |   | 1 (5.3%)           |   | 0 (0.0%)           |   | 1 (5.3%)           |   |
| SOC: Eye disorders                                        |     |                    |   |                    |   |                    |   |                    |   |
| - Amblyopia                                               | 1   | 1 (5.3%)           |   | 0 (0.0%)           |   | 0 (0.0%)           |   | 1 (5.3%)           |   |
| - Diplopia                                                | 1   | 1 (5.3%)           |   | 0 (0.0%)           |   | 0 (0.0%)           |   | 1 (5.3%)           |   |
| - Eye movement disorder                                   | 1   | 1 (5.3%)           |   | 0 (0.0%)           |   | 0 (0.0%)           |   | 1 (5.3%)           |   |
| SOC: General disorders and administration site conditions |     |                    |   |                    |   |                    |   |                    |   |
| - Fatigue                                                 | 2   | 2 (10.5%)          |   | 1 (5.3%)           |   | 0 (0.0%)           |   | 3 (15.8%)          |   |
| - Inflammation                                            | 1   | 1 (5.3%)           |   | 0 (0.0%)           |   | 0 (0.0%)           |   | 1 (5.3%)           |   |
| - Pain                                                    | 1   | 1 (5.3%)           |   | 0 (0.0%)           |   | 0 (0.0%)           |   | 1 (5.3%)           |   |
| - Pyrexia                                                 | 2   | 2 (10.5%)          |   | 1 (5.3%)           |   | 0 (0.0%)           |   | 3 (15.8%)          |   |
| SOC: Infections and infestations                          |     |                    |   |                    |   |                    |   |                    |   |
| - Clostridium difficile colitis                           | 0   | 0 (0.0%)           |   | 1 (5.3%)           |   | 0 (0.0%)           |   | 1 (5.3%)           |   |
| - Gastroenteritis rotavirus                               | 0   | 0 (0.0%)           |   | 1 (5.3%)           |   | 0 (0.0%)           |   | 1 (5.3%)           |   |
| - Herpes simplex meningoencephalitis                      | 0   | 0 (0.0%)           |   | 0 (0.0%)           |   | 1 (5.3%)           |   | 1 (5.3%)           |   |
| - Herpes zoster                                           | 0   | 0 (0.0%)           |   | 1 (5.3%)           |   | 0 (0.0%)           |   | 1 (5.3%)           |   |
| - Pneumonia                                               | 0   | 0 (0.0%)           |   | 0 (0.0%)           |   | 1 (5.3%)           |   | 1 (5.3%)           |   |
| SOC: Injury, poisoning and procedural complications       |     |                    |   |                    |   |                    |   |                    |   |
| - Fall                                                    | 0   | 0 (0.0%)           |   | 1 (5.3%)           |   | 0 (0.0%)           |   | 1 (5.3%)           |   |
| - Mouth injury                                            | 0   | 0 (0.0%)           |   | 1 (5.3%)           |   | 0 (0.0%)           |   | 1 (5.3%)           |   |

|                                                      | #AE | mild<br># patients<br>with AE | moderate<br># patients<br>with AE | severe<br># patients<br>with AE | Total<br># patients<br>with AE |
|------------------------------------------------------|-----|-------------------------------|-----------------------------------|---------------------------------|--------------------------------|
| SOC: Investigations                                  |     |                               |                                   |                                 |                                |
| - Blood creatinine increased                         | 1   | 1 (5.3%)                      | 0                                 | 0 (0.0%)                        | 1 (5.3%)                       |
| - Blood potassium decreased                          | 1   | 1 (5.3%)                      | 0                                 | 0 (0.0%)                        | 1 (5.3%)                       |
| - Metirapone challenge test                          | 1   | 1 (5.3%)                      | 0                                 | 0 (0.0%)                        | 1 (5.3%)                       |
| SOC: Metabolism and nutrition disorders              |     |                               |                                   |                                 |                                |
| - Hyperglycaemia                                     | 1   | 1 (5.3%)                      | 0                                 | 0 (0.0%)                        | 1 (5.3%)                       |
| SOC: Musculoskeletal and connective tissue disorders |     |                               |                                   |                                 |                                |
| - Back pain                                          | 0   | 0 (0.0%)                      | 1 (5.3%)                          | 0                               | 1 (5.3%)                       |
| - Pain in extremity                                  | 1   | 1 (5.3%)                      | 1 (5.3%)                          | 0                               | 2 (10.5%)                      |
| SOC: Nervous system disorders                        |     |                               |                                   |                                 |                                |
| - Aphasia                                            | 1   | 1 (5.3%)                      | 0                                 | 0 (0.0%)                        | 1 (5.3%)                       |
| - Convulsion                                         | 0   | 0 (0.0%)                      | 2 (10.5%)                         | 1 (5.3%)                        | 3 (15.8%)                      |
| - Epileptic aura                                     | 1   | 1 (5.3%)                      | 0                                 | 0 (0.0%)                        | 1 (5.3%)                       |
| - Headache                                           | 2   | 2 (10.5%)                     | 0                                 | 0 (0.0%)                        | 2 (10.5%)                      |
| - Memory impairment                                  | 0   | 0 (0.0%)                      | 1 (5.3%)                          | 0                               | 1 (5.3%)                       |
| SOC: Psychiatric disorders                           |     |                               |                                   |                                 |                                |
| - Depressed mood                                     | 1   | 1 (5.3%)                      | 0                                 | 0 (0.0%)                        | 1 (5.3%)                       |
| - Insomnia                                           | 1   | 1 (5.3%)                      | 0                                 | 0 (0.0%)                        | 1 (5.3%)                       |
| SOC: Renal and urinary disorders                     |     |                               |                                   |                                 |                                |
| - Renal failure                                      | 1   | 1 (5.3%)                      | 0                                 | 1 (5.3%)                        | 2 (10.5%)                      |
| SOC: Respiratory_ thoracic and mediastinal disorders |     |                               |                                   |                                 |                                |
| - Pneumonia aspiration                               | 0   | 0 (0.0%)                      | 0                                 | 1 (5.3%)                        | 1 (5.3%)                       |
| - Respiratory failure                                | 0   | 0 (0.0%)                      | 1 (5.3%)                          | 1 (5.3%)                        | 2 (10.5%)                      |
| SOC: Skin and subcutaneous tissue disorders          |     |                               |                                   |                                 |                                |
| - Erythema                                           | 1   | 1 (5.3%)                      | 0                                 | 0 (0.0%)                        | 1 (5.3%)                       |
| - Rash                                               | 0   | 0 (0.0%)                      | 1 (5.3%)                          | 0                               | 1 (5.3%)                       |
| SOC: Social circumstances                            |     |                               |                                   |                                 |                                |
| - Stress at work                                     | 1   | 1 (5.3%)                      | 0                                 | 0 (0.0%)                        | 1 (5.3%)                       |
| SOC: Surgical and medical procedures                 |     |                               |                                   |                                 |                                |
| - Endotracheal intubation                            | 0   | 0 (0.0%)                      | 1 (5.3%)                          | 0                               | 1 (5.3%)                       |
| - Mechanical ventilation                             | 0   | 0 (0.0%)                      | 1 (5.3%)                          | 0                               | 1 (5.3%)                       |

|                         |     | mild               | moderate           | severe             | Total              |
|-------------------------|-----|--------------------|--------------------|--------------------|--------------------|
|                         | #AE | # patients with AE | # patients with AE | # patients with AE | # patients with AE |
| SOC: Vascular disorders |     |                    |                    |                    |                    |
| - Flushing              | 1   | 1 (5.3%)           | 0                  | 0 (0.0%)           | 1 (5.3%)           |
| - Hypertension          | 1   | 1 (5.3%)           | 0                  | 0 (0.0%)           | 1 (5.3%)           |

### 10.6.2.2 Adverse events according to causality to study drug

Table 10.6.16: System Organ Class (SOC) according to causality to study drug - group: Placebo

| System organ class                                     | #AE | none               | unlikely           | possible           | not assessable     | Total     |
|--------------------------------------------------------|-----|--------------------|--------------------|--------------------|--------------------|-----------|
|                                                        |     | # patients with AE | # patients with AE | # patients with AE | # patients with AE |           |
| - Cardiac disorders                                    | 1   | 1 (5.3%)           | 0                  | 0 (0.0%)           | 0                  | 1 (5.3%)  |
| - Congenital, familial and genetic disorders           | 1   | 1 (5.3%)           | 0                  | 0 (0.0%)           | 0                  | 1 (5.3%)  |
| - Eye disorders                                        | 0   | 0 (0.0%)           | 1                  | 1 (5.3%)           | 0                  | 1 (5.3%)  |
| - Gastrointestinal disorders                           | 3   | 2 (10.5%)          | 0                  | 0 (0.0%)           | 2                  | 3 (15.8%) |
| - General disorders and administration site conditions | 9   | 7 (36.8%)          | 3                  | 1 (5.3%)           | 0                  | 7 (36.8%) |
| - Hepatobiliary disorders                              | 1   | 1 (5.3%)           | 0                  | 0 (0.0%)           | 0                  | 1 (5.3%)  |
| - Infections and infestations                          | 12  | 8 (42.1%)          | 1                  | 1 (5.3%)           | 0                  | 9 (47.4%) |
| - Injury, poisoning and procedural complications       | 2   | 2 (10.5%)          | 0                  | 0 (0.0%)           | 0                  | 2 (10.5%) |
| - Investigations                                       | 7   | 4 (21.1%)          | 1                  | 1 (5.3%)           | 0                  | 5 (26.3%) |
| - Metabolism and nutrition disorders                   | 3   | 3 (15.8%)          | 0                  | 0 (0.0%)           | 0                  | 3 (15.8%) |
| - Musculoskeletal and connective tissue disorders      | 3   | 1 (5.3%)           | 2                  | 0 (0.0%)           | 0                  | 3 (15.8%) |
| - Nervous system disorders                             | 4   | 4 (21.1%)          | 1                  | 0 (0.0%)           | 0                  | 5 (26.3%) |
| - Psychiatric disorders                                | 2   | 2 (10.5%)          | 0                  | 0 (0.0%)           | 0                  | 2 (10.5%) |
| - Renal and urinary disorders                          | 1   | 1 (5.3%)           | 0                  | 0 (0.0%)           | 0                  | 1 (5.3%)  |
| - Respiratory, thoracic and mediastinal disorders      | 2   | 2 (10.5%)          | 0                  | 0 (0.0%)           | 0                  | 2 (10.5%) |
| - Skin and subcutaneous tissue disorders               | 3   | 3 (15.8%)          | 0                  | 1 (5.3%)           | 0                  | 4 (21.1%) |
| - Surgical and medical procedures                      | 3   | 1 (5.3%)           | 0                  | 0 (0.0%)           | 0                  | 3 (15.8%) |
| - Vascular disorders                                   | 3   | 3 (15.8%)          | 1                  | 0 (0.0%)           | 0                  | 4 (21.1%) |

**Table 10.6.17: System Organ Class (SOC) according to causality to study drug - group: Dexamethasone**

| System organ class                                     | #AE | none               |   | unlikely           |          | possible           |          | probable           |          | not assessable     |          | Total # patients with AE |
|--------------------------------------------------------|-----|--------------------|---|--------------------|----------|--------------------|----------|--------------------|----------|--------------------|----------|--------------------------|
|                                                        |     | # patients with AE | % | # patients with AE | %        | # patients with AE | %        | # patients with AE | %        | # patients with AE | %        |                          |
| - Blood and lymphatic system disorders                 | 1   | 1 (5.3%)           | 0 | 0 (0.0%)           | 1 (5.3%) | 0                  | 0 (0.0%) | 0                  | 0 (0.0%) | 0                  | 0 (0.0%) | 2 (10.5%)                |
| - Cardiac disorders                                    | 1   | 1 (5.3%)           | 0 | 0 (0.0%)           | 0        | 0 (0.0%)           | 0        | 0 (0.0%)           | 0        | 0 (0.0%)           | 0        | 1 (5.3%)                 |
| - Ear and labyrinth disorders                          | 1   | 1 (5.3%)           | 0 | 0 (0.0%)           | 0        | 0 (0.0%)           | 0        | 0 (0.0%)           | 0        | 0 (0.0%)           | 0        | 1 (5.3%)                 |
| - Endocrine disorders                                  | 0   | 0 (0.0%)           | 1 | 1 (5.3%)           | 0        | 0 (0.0%)           | 0        | 0 (0.0%)           | 0        | 0 (0.0%)           | 0        | 1 (5.3%)                 |
| - Eye disorders                                        | 3   | 3 (15.8%)          | 0 | 0 (0.0%)           | 0        | 0 (0.0%)           | 0        | 0 (0.0%)           | 0        | 0 (0.0%)           | 0        | 3 (15.8%)                |
| - General disorders and administration site conditions | 8   | 7 (36.8%)          | 0 | 0 (0.0%)           | 0        | 0 (0.0%)           | 0        | 0 (0.0%)           | 0        | 0 (0.0%)           | 1        | 7 (36.8%)                |
| - Infections and infestations                          | 3   | 3 (15.8%)          | 1 | 1 (5.3%)           | 0        | 0 (0.0%)           | 0        | 0 (0.0%)           | 0        | 0 (0.0%)           | 1        | 5 (26.3%)                |
| - Injury, poisoning and procedural complications       | 2   | 1 (5.3%)           | 0 | 0 (0.0%)           | 0        | 0 (0.0%)           | 0        | 0 (0.0%)           | 0        | 0 (0.0%)           | 0        | 2 (10.5%)                |
| - Investigations                                       | 2   | 2 (10.5%)          | 1 | 1 (5.3%)           | 0        | 0 (0.0%)           | 0        | 0 (0.0%)           | 0        | 0 (0.0%)           | 0        | 3 (15.8%)                |
| - Metabolism and nutrition disorders                   | 0   | 0 (0.0%)           | 0 | 0 (0.0%)           | 0        | 0 (0.0%)           | 1        | 1 (5.3%)           | 0        | 0 (0.0%)           | 0        | 1 (5.3%)                 |
| - Musculoskeletal and connective tissue disorders      | 3   | 1 (5.3%)           | 0 | 0 (0.0%)           | 0        | 0 (0.0%)           | 0        | 0 (0.0%)           | 0        | 0 (0.0%)           | 0        | 3 (15.8%)                |
| - Nervous system disorders                             | 7   | 5 (26.3%)          | 1 | 1 (5.3%)           | 0        | 0 (0.0%)           | 0        | 0 (0.0%)           | 0        | 0 (0.0%)           | 0        | 6 (31.6%)                |
| - Psychiatric disorders                                | 1   | 1 (5.3%)           | 0 | 0 (0.0%)           | 1        | 1 (5.3%)           | 0        | 0 (0.0%)           | 0        | 0 (0.0%)           | 0        | 2 (10.5%)                |
| - Renal and urinary disorders                          | 1   | 1 (5.3%)           | 1 | 1 (5.3%)           | 0        | 0 (0.0%)           | 0        | 0 (0.0%)           | 0        | 0 (0.0%)           | 0        | 2 (10.5%)                |
| - Respiratory, thoracic and mediastinal disorders      | 2   | 2 (10.5%)          | 1 | 1 (5.3%)           | 0        | 0 (0.0%)           | 0        | 0 (0.0%)           | 0        | 0 (0.0%)           | 0        | 3 (15.8%)                |
| - Skin and subcutaneous tissue disorders               | 1   | 1 (5.3%)           | 1 | 1 (5.3%)           | 0        | 0 (0.0%)           | 0        | 0 (0.0%)           | 0        | 0 (0.0%)           | 0        | 2 (10.5%)                |
| - Social circumstances                                 | 1   | 1 (5.3%)           | 0 | 0 (0.0%)           | 0        | 0 (0.0%)           | 0        | 0 (0.0%)           | 0        | 0 (0.0%)           | 0        | 1 (5.3%)                 |
| - Surgical and medical procedures                      | 0   | 0 (0.0%)           | 2 | 1 (5.3%)           | 0        | 0 (0.0%)           | 0        | 0 (0.0%)           | 0        | 0 (0.0%)           | 0        | 2 (10.5%)                |
| - Vascular disorders                                   | 1   | 1 (5.3%)           | 0 | 0 (0.0%)           | 1        | 1 (5.3%)           | 0        | 0 (0.0%)           | 0        | 0 (0.0%)           | 0        | 2 (10.5%)                |

Table 10.6.18: SOC / PT according to causality to study drug - group: Placebo

|                                                           | #AE | ongoing            |   | recovered completely |   | recovered with sequelae |   | death              |   | unknown            |   | Total # patients with AE |
|-----------------------------------------------------------|-----|--------------------|---|----------------------|---|-------------------------|---|--------------------|---|--------------------|---|--------------------------|
|                                                           |     | # patients with AE | % | # patients with AE   | % | # patients with AE      | % | # patients with AE | % | # patients with AE | % |                          |
| SOC: Cardiac disorders                                    |     |                    |   |                      |   |                         |   |                    |   |                    |   |                          |
| - Atrial fibrillation                                     | 0   | 0 (0.0%)           | 0 | 0 (0.0%)             | 0 | 0 (0.0%)                | 0 | 0 (0.0%)           | 0 | 0 (0.0%)           | 0 | 1 (5.3%)                 |
| SOC: Congenital_familial and genetic disorders            |     |                    |   |                      |   |                         |   |                    |   |                    |   |                          |
| - Hydrocele                                               | 0   | 0 (0.0%)           | 0 | 0 (0.0%)             | 0 | 0 (0.0%)                | 0 | 0 (0.0%)           | 0 | 0 (0.0%)           | 0 | 1 (5.3%)                 |
| SOC: Eye disorders                                        |     |                    |   |                      |   |                         |   |                    |   |                    |   |                          |
| - Visual impairment                                       | 1   | 1 (5.3%)           | 0 | 0 (0.0%)             | 0 | 0 (0.0%)                | 0 | 0 (0.0%)           | 0 | 0 (0.0%)           | 0 | 1 (5.3%)                 |
| SOC: Gastrointestinal disorders                           |     |                    |   |                      |   |                         |   |                    |   |                    |   |                          |
| - Constipation                                            | 0   | 0 (0.0%)           | 0 | 0 (0.0%)             | 0 | 0 (0.0%)                | 0 | 0 (0.0%)           | 0 | 0 (0.0%)           | 0 | 1 (5.3%)                 |
| - Diarrhoea                                               | 0   | 0 (0.0%)           | 0 | 0 (0.0%)             | 0 | 0 (0.0%)                | 0 | 0 (0.0%)           | 0 | 0 (0.0%)           | 0 | 1 (5.3%)                 |
| - Nausea                                                  | 0   | 0 (0.0%)           | 0 | 0 (0.0%)             | 0 | 1 (5.3%)                | 0 | 0 (0.0%)           | 0 | 0 (0.0%)           | 0 | 1 (5.3%)                 |
| - Vomiting                                                | 0   | 0 (0.0%)           | 0 | 0 (0.0%)             | 0 | 1 (5.3%)                | 0 | 0 (0.0%)           | 0 | 0 (0.0%)           | 0 | 2 (10.5%)                |
| SOC: General disorders and administration site conditions |     |                    |   |                      |   |                         |   |                    |   |                    |   |                          |
| - Condition aggravated                                    | 0   | 0 (0.0%)           | 0 | 0 (0.0%)             | 0 | 0 (0.0%)                | 0 | 0 (0.0%)           | 0 | 0 (0.0%)           | 0 | 1 (5.3%)                 |
| - General physical health deterioration                   | 0   | 0 (0.0%)           | 0 | 0 (0.0%)             | 0 | 0 (0.0%)                | 0 | 0 (0.0%)           | 0 | 0 (0.0%)           | 0 | 1 (5.3%)                 |
| - Infusion site extravasation                             | 0   | 0 (0.0%)           | 0 | 0 (0.0%)             | 0 | 0 (0.0%)                | 0 | 0 (0.0%)           | 0 | 0 (0.0%)           | 0 | 1 (5.3%)                 |
| - Local swelling                                          | 0   | 0 (0.0%)           | 0 | 0 (0.0%)             | 0 | 0 (0.0%)                | 0 | 0 (0.0%)           | 0 | 0 (0.0%)           | 0 | 1 (5.3%)                 |
| - Oedema peripheral                                       | 0   | 0 (0.0%)           | 0 | 0 (0.0%)             | 0 | 0 (0.0%)                | 0 | 0 (0.0%)           | 0 | 0 (0.0%)           | 0 | 1 (5.3%)                 |
| - Pain                                                    | 0   | 0 (0.0%)           | 0 | 0 (0.0%)             | 0 | 0 (0.0%)                | 0 | 0 (0.0%)           | 0 | 0 (0.0%)           | 0 | 1 (5.3%)                 |
| - Pyrexia                                                 | 3   | 1 (5.3%)           | 1 | 1 (5.3%)             | 0 | 0 (0.0%)                | 0 | 0 (0.0%)           | 0 | 0 (0.0%)           | 0 | 4 (21.1%)                |
| SOC: Hepatobiliary disorders                              |     |                    |   |                      |   |                         |   |                    |   |                    |   |                          |
| - Cholangitis                                             | 0   | 0 (0.0%)           | 0 | 0 (0.0%)             | 0 | 0 (0.0%)                | 0 | 0 (0.0%)           | 0 | 0 (0.0%)           | 0 | 1 (5.3%)                 |
| SOC: Infections and infestations                          |     |                    |   |                      |   |                         |   |                    |   |                    |   |                          |
| - Abscess                                                 | 0   | 0 (0.0%)           | 0 | 0 (0.0%)             | 0 | 0 (0.0%)                | 0 | 0 (0.0%)           | 0 | 0 (0.0%)           | 0 | 1 (5.3%)                 |
| - Bacteraemia                                             | 1   | 1 (5.3%)           | 0 | 0 (0.0%)             | 0 | 0 (0.0%)                | 0 | 0 (0.0%)           | 0 | 0 (0.0%)           | 0 | 1 (5.3%)                 |
| - Bacterial infection                                     | 0   | 0 (0.0%)           | 0 | 0 (0.0%)             | 0 | 0 (0.0%)                | 0 | 0 (0.0%)           | 0 | 0 (0.0%)           | 0 | 1 (5.3%)                 |
| - Brain abscess                                           | 0   | 0 (0.0%)           | 0 | 0 (0.0%)             | 0 | 0 (0.0%)                | 0 | 0 (0.0%)           | 0 | 0 (0.0%)           | 0 | 1 (5.3%)                 |
| - Bronchitis                                              | 0   | 0 (0.0%)           | 0 | 0 (0.0%)             | 0 | 0 (0.0%)                | 0 | 0 (0.0%)           | 0 | 0 (0.0%)           | 0 | 1 (5.3%)                 |
| - Bronchopneumonia                                        | 0   | 0 (0.0%)           | 0 | 0 (0.0%)             | 0 | 0 (0.0%)                | 0 | 0 (0.0%)           | 0 | 0 (0.0%)           | 0 | 2 (10.5%)                |
| - Herpes simplex                                          | 0   | 0 (0.0%)           | 0 | 0 (0.0%)             | 0 | 0 (0.0%)                | 0 | 0 (0.0%)           | 0 | 0 (0.0%)           | 0 | 1 (5.3%)                 |
| - Pneumonia                                               | 0   | 0 (0.0%)           | 0 | 0 (0.0%)             | 0 | 0 (0.0%)                | 0 | 0 (0.0%)           | 0 | 0 (0.0%)           | 0 | 2 (10.5%)                |
| - Sepsis                                                  | 0   | 0 (0.0%)           | 0 | 0 (0.0%)             | 0 | 0 (0.0%)                | 0 | 0 (0.0%)           | 0 | 0 (0.0%)           | 0 | 2 (10.5%)                |
| - Urinary tract infection                                 | 0   | 0 (0.0%)           | 0 | 0 (0.0%)             | 0 | 0 (0.0%)                | 0 | 0 (0.0%)           | 0 | 0 (0.0%)           | 0 | 1 (5.3%)                 |

|                                                      | #AE | ongoing<br># patients<br>with AE | recovered<br>completely<br># patients<br>with AE | recovered with<br>sequelae<br># patients<br>with AE | death<br># patients<br>with AE | unknown<br># patients<br>with AE | Total<br># patients<br>with AE |
|------------------------------------------------------|-----|----------------------------------|--------------------------------------------------|-----------------------------------------------------|--------------------------------|----------------------------------|--------------------------------|
| SOC: Injury, poisoning and procedural complications  |     |                                  |                                                  |                                                     |                                |                                  |                                |
| - Fall                                               | 0   | 0 (0.0%)                         | 0 (0.0%)                                         | 0 (0.0%)                                            | 0 (0.0%)                       | 0 (0.0%)                         | 2 (10.5%)                      |
| SOC: Investigations                                  |     |                                  |                                                  |                                                     |                                |                                  |                                |
| - Alanine aminotransferase increased                 | 0   | 0 (0.0%)                         | 0 (0.0%)                                         | 0 (0.0%)                                            | 0 (0.0%)                       | 0 (0.0%)                         | 1 (5.3%)                       |
| - Blood acid phosphatase increased                   | 0   | 0 (0.0%)                         | 0 (0.0%)                                         | 0 (0.0%)                                            | 0 (0.0%)                       | 0 (0.0%)                         | 1 (5.3%)                       |
| - Blood creatinine increased                         | 0   | 0 (0.0%)                         | 0 (0.0%)                                         | 0 (0.0%)                                            | 0 (0.0%)                       | 0 (0.0%)                         | 1 (5.3%)                       |
| - Blood culture positive                             | 1   | 1 (5.3%)                         | 0 (0.0%)                                         | 0 (0.0%)                                            | 0 (0.0%)                       | 0 (0.0%)                         | 1 (5.3%)                       |
| - Body temperature increased                         | 0   | 0 (0.0%)                         | 0 (0.0%)                                         | 0 (0.0%)                                            | 0 (0.0%)                       | 0 (0.0%)                         | 1 (5.3%)                       |
| - C-reactive protein increased                       | 0   | 0 (0.0%)                         | 0 (0.0%)                                         | 0 (0.0%)                                            | 0 (0.0%)                       | 0 (0.0%)                         | 1 (5.3%)                       |
| - Lipase increased                                   | 0   | 0 (0.0%)                         | 0 (0.0%)                                         | 0 (0.0%)                                            | 0 (0.0%)                       | 0 (0.0%)                         | 1 (5.3%)                       |
| - Weight decreased                                   | 0   | 0 (0.0%)                         | 0 (0.0%)                                         | 0 (0.0%)                                            | 0 (0.0%)                       | 0 (0.0%)                         | 1 (5.3%)                       |
| SOC: Metabolism and nutrition disorders              |     |                                  |                                                  |                                                     |                                |                                  |                                |
| - Decreased appetite                                 | 0   | 0 (0.0%)                         | 0 (0.0%)                                         | 0 (0.0%)                                            | 0 (0.0%)                       | 0 (0.0%)                         | 1 (5.3%)                       |
| - Hypokalaemia                                       | 0   | 0 (0.0%)                         | 0 (0.0%)                                         | 0 (0.0%)                                            | 0 (0.0%)                       | 0 (0.0%)                         | 2 (10.5%)                      |
| SOC: Musculoskeletal and connective tissue disorders |     |                                  |                                                  |                                                     |                                |                                  |                                |
| - Muscle contracture                                 | 0   | 0 (0.0%)                         | 0 (0.0%)                                         | 0 (0.0%)                                            | 0 (0.0%)                       | 0 (0.0%)                         | 1 (5.3%)                       |
| - Rhabdomyolysis                                     | 1   | 1 (5.3%)                         | 0 (0.0%)                                         | 0 (0.0%)                                            | 0 (0.0%)                       | 0 (0.0%)                         | 1 (5.3%)                       |
| - Rotator cuff syndrome                              | 1   | 1 (5.3%)                         | 0 (0.0%)                                         | 0 (0.0%)                                            | 0 (0.0%)                       | 0 (0.0%)                         | 1 (5.3%)                       |
| SOC: Nervous system disorders                        |     |                                  |                                                  |                                                     |                                |                                  |                                |
| - Anosmia                                            | 0   | 0 (0.0%)                         | 0 (0.0%)                                         | 0 (0.0%)                                            | 0 (0.0%)                       | 0 (0.0%)                         | 1 (5.3%)                       |
| - Convulsion                                         | 0   | 0 (0.0%)                         | 0 (0.0%)                                         | 0 (0.0%)                                            | 0 (0.0%)                       | 0 (0.0%)                         | 1 (5.3%)                       |
| - Grand mal convulsion                               | 1   | 1 (5.3%)                         | 0 (0.0%)                                         | 0 (0.0%)                                            | 0 (0.0%)                       | 0 (0.0%)                         | 1 (5.3%)                       |
| - Headache                                           | 0   | 0 (0.0%)                         | 0 (0.0%)                                         | 0 (0.0%)                                            | 0 (0.0%)                       | 0 (0.0%)                         | 1 (5.3%)                       |
| - Pleocytosis                                        | 0   | 0 (0.0%)                         | 0 (0.0%)                                         | 0 (0.0%)                                            | 0 (0.0%)                       | 0 (0.0%)                         | 1 (5.3%)                       |
| SOC: Psychiatric disorders                           |     |                                  |                                                  |                                                     |                                |                                  |                                |
| - Depression                                         | 0   | 0 (0.0%)                         | 0 (0.0%)                                         | 0 (0.0%)                                            | 0 (0.0%)                       | 0 (0.0%)                         | 1 (5.3%)                       |
| - Insomnia                                           | 0   | 0 (0.0%)                         | 0 (0.0%)                                         | 0 (0.0%)                                            | 0 (0.0%)                       | 0 (0.0%)                         | 1 (5.3%)                       |
| SOC: Renal and urinary disorders                     |     |                                  |                                                  |                                                     |                                |                                  |                                |
| - Renal failure                                      | 0   | 0 (0.0%)                         | 0 (0.0%)                                         | 0 (0.0%)                                            | 0 (0.0%)                       | 0 (0.0%)                         | 1 (5.3%)                       |

|                                                      | #AE | ongoing<br># patients<br>with AE | recovered<br>completely<br># patients<br>with AE | recovered with<br>sequelae<br># patients<br>with AE | death<br># patients<br>with AE | unknown<br># patients<br>with AE | Total<br># patients<br>with AE |
|------------------------------------------------------|-----|----------------------------------|--------------------------------------------------|-----------------------------------------------------|--------------------------------|----------------------------------|--------------------------------|
| SOC: Respiratory_ thoracic and mediastinal disorders |     |                                  |                                                  |                                                     |                                |                                  |                                |
| - Hiccups                                            | 0   | 0 (0.0%)                         | 0                                                | 0 (0.0%)                                            | 0                              | 0 (0.0%)                         | 1 (5.3%)                       |
| - Pulmonary embolism                                 | 0   | 0 (0.0%)                         | 0                                                | 0 (0.0%)                                            | 0                              | 0 (0.0%)                         | 1 (5.3%)                       |
| SOC: Skin and subcutaneous tissue disorders          |     |                                  |                                                  |                                                     |                                |                                  |                                |
| - Drug eruption                                      | 0   | 0 (0.0%)                         | 0                                                | 0 (0.0%)                                            | 0                              | 0 (0.0%)                         | 1 (5.3%)                       |
| - Erythema                                           | 0   | 0 (0.0%)                         | 1 (5.3%)                                         | 0                                                   | 0 (0.0%)                       | 0 (0.0%)                         | 1 (5.3%)                       |
| - Rash                                               | 0   | 0 (0.0%)                         | 0                                                | 0 (0.0%)                                            | 0                              | 0 (0.0%)                         | 1 (5.3%)                       |
| - Skin necrosis                                      | 0   | 0 (0.0%)                         | 0                                                | 0 (0.0%)                                            | 0                              | 0 (0.0%)                         | 1 (5.3%)                       |
| SOC: Surgical and medical procedures                 |     |                                  |                                                  |                                                     |                                |                                  |                                |
| - Endotracheal intubation                            | 0   | 0 (0.0%)                         | 0                                                | 0 (0.0%)                                            | 0                              | 0 (0.0%)                         | 1 (5.3%)                       |
| - Gastrostomy                                        | 0   | 0 (0.0%)                         | 0                                                | 0 (0.0%)                                            | 0                              | 0 (0.0%)                         | 1 (5.3%)                       |
| - Tracheostomy                                       | 0   | 0 (0.0%)                         | 0                                                | 0 (0.0%)                                            | 0                              | 0 (0.0%)                         | 1 (5.3%)                       |
| SOC: Vascular disorders                              |     |                                  |                                                  |                                                     |                                |                                  |                                |
| - Deep vein thrombosis                               | 0   | 0 (0.0%)                         | 0                                                | 0 (0.0%)                                            | 0                              | 0 (0.0%)                         | 1 (5.3%)                       |
| - Haematoma                                          | 0   | 0 (0.0%)                         | 0                                                | 0 (0.0%)                                            | 0                              | 0 (0.0%)                         | 1 (5.3%)                       |
| - Hypertension                                       | 1   | 1 (5.3%)                         | 0                                                | 0 (0.0%)                                            | 0                              | 0 (0.0%)                         | 1 (5.3%)                       |
| - Thrombosis                                         | 0   | 0 (0.0%)                         | 0                                                | 0 (0.0%)                                            | 0                              | 0 (0.0%)                         | 1 (5.3%)                       |

**Table 10.6.19: SOC / PT according to causality to study drug - group: Dexamethasone**

|                                                                  | #AE | ongoing<br># patients<br>with AE | recovered<br>completely<br># patients<br>with AE | recovered with<br>sequelae<br># patients<br>with AE | death<br># patients<br>with AE | unknown<br># patients<br>with AE | Total<br># patients<br>with AE |
|------------------------------------------------------------------|-----|----------------------------------|--------------------------------------------------|-----------------------------------------------------|--------------------------------|----------------------------------|--------------------------------|
| <b>SOC: Blood and lymphatic system disorders</b>                 |     |                                  |                                                  |                                                     |                                |                                  |                                |
| - Leukocytosis                                                   | 0   | 0 (0.0%)                         | 1 (5.3%)                                         | 0 (0.0%)                                            | 0 (0.0%)                       | 0 (0.0%)                         | 1 (5.3%)                       |
| - Lymphadenopathy                                                | 0   | 0 (0.0%)                         | 0 (0.0%)                                         | 0 (0.0%)                                            | 0 (0.0%)                       | 0 (0.0%)                         | 1 (5.3%)                       |
| <b>SOC: Cardiac disorders</b>                                    |     |                                  |                                                  |                                                     |                                |                                  |                                |
| - Arrhythmia                                                     | 0   | 0 (0.0%)                         | 0 (0.0%)                                         | 0 (0.0%)                                            | 0 (0.0%)                       | 0 (0.0%)                         | 1 (5.3%)                       |
| <b>SOC: Ear and labyrinth disorders</b>                          |     |                                  |                                                  |                                                     |                                |                                  |                                |
| - Tinnitus                                                       | 0   | 0 (0.0%)                         | 0 (0.0%)                                         | 0 (0.0%)                                            | 0 (0.0%)                       | 0 (0.0%)                         | 1 (5.3%)                       |
| <b>SOC: Endocrine disorders</b>                                  |     |                                  |                                                  |                                                     |                                |                                  |                                |
| - Diabetes insipidus                                             | 1   | 1 (5.3%)                         | 0 (0.0%)                                         | 0 (0.0%)                                            | 0 (0.0%)                       | 0 (0.0%)                         | 1 (5.3%)                       |
| <b>SOC: Eye disorders</b>                                        |     |                                  |                                                  |                                                     |                                |                                  |                                |
| - Amblyopia                                                      | 0   | 0 (0.0%)                         | 0 (0.0%)                                         | 0 (0.0%)                                            | 0 (0.0%)                       | 0 (0.0%)                         | 1 (5.3%)                       |
| - Diplopia                                                       | 0   | 0 (0.0%)                         | 0 (0.0%)                                         | 0 (0.0%)                                            | 0 (0.0%)                       | 0 (0.0%)                         | 1 (5.3%)                       |
| - Eye movement disorder                                          | 0   | 0 (0.0%)                         | 0 (0.0%)                                         | 0 (0.0%)                                            | 0 (0.0%)                       | 0 (0.0%)                         | 1 (5.3%)                       |
| <b>SOC: General disorders and administration site conditions</b> |     |                                  |                                                  |                                                     |                                |                                  |                                |
| - Fatigue                                                        | 0   | 0 (0.0%)                         | 0 (0.0%)                                         | 0 (0.0%)                                            | 0 (0.0%)                       | 0 (0.0%)                         | 3 (15.8%)                      |
| - Inflammation                                                   | 0   | 0 (0.0%)                         | 0 (0.0%)                                         | 0 (0.0%)                                            | 0 (0.0%)                       | 0 (0.0%)                         | 1 (5.3%)                       |
| - Pain                                                           | 0   | 0 (0.0%)                         | 0 (0.0%)                                         | 0 (0.0%)                                            | 0 (0.0%)                       | 0 (0.0%)                         | 1 (5.3%)                       |
| - Pyrexia                                                        | 0   | 0 (0.0%)                         | 0 (0.0%)                                         | 0 (0.0%)                                            | 0 (0.0%)                       | 0 (0.0%)                         | 3 (15.8%)                      |
| <b>SOC: Infections and infestations</b>                          |     |                                  |                                                  |                                                     |                                |                                  |                                |
| - Clostridium difficile colitis                                  | 1   | 1 (5.3%)                         | 0 (0.0%)                                         | 0 (0.0%)                                            | 0 (0.0%)                       | 0 (0.0%)                         | 1 (5.3%)                       |
| - Gastroenteritis rotavirus                                      | 0   | 0 (0.0%)                         | 0 (0.0%)                                         | 0 (0.0%)                                            | 0 (0.0%)                       | 0 (0.0%)                         | 1 (5.3%)                       |
| - Herpes simplex meningoencephalitis                             | 0   | 0 (0.0%)                         | 0 (0.0%)                                         | 0 (0.0%)                                            | 1 (5.3%)                       | 0 (0.0%)                         | 1 (5.3%)                       |
| - Herpes zoster                                                  | 0   | 0 (0.0%)                         | 0 (0.0%)                                         | 0 (0.0%)                                            | 0 (0.0%)                       | 0 (0.0%)                         | 1 (5.3%)                       |
| - Pneumonia                                                      | 0   | 0 (0.0%)                         | 0 (0.0%)                                         | 0 (0.0%)                                            | 0 (0.0%)                       | 0 (0.0%)                         | 1 (5.3%)                       |
| <b>SOC: Injury, poisoning and procedural complications</b>       |     |                                  |                                                  |                                                     |                                |                                  |                                |
| - Fall                                                           | 0   | 0 (0.0%)                         | 0 (0.0%)                                         | 0 (0.0%)                                            | 0 (0.0%)                       | 0 (0.0%)                         | 1 (5.3%)                       |
| - Mouth injury                                                   | 0   | 0 (0.0%)                         | 0 (0.0%)                                         | 0 (0.0%)                                            | 0 (0.0%)                       | 0 (0.0%)                         | 1 (5.3%)                       |



|                                                      | #AE | ongoing<br># patients<br>with AE | recovered<br>completely<br># patients<br>with AE | recovered with<br>sequelae<br># patients<br>with AE | death<br># patients<br>with AE | unknown<br># patients<br>with AE | Total<br># patients<br>with AE |
|------------------------------------------------------|-----|----------------------------------|--------------------------------------------------|-----------------------------------------------------|--------------------------------|----------------------------------|--------------------------------|
| SOC: Investigations                                  |     |                                  |                                                  |                                                     |                                |                                  |                                |
| - Blood creatinine increased                         | 1   | 1 (5.3%)                         | 0                                                | 0 (0.0%)                                            | 0                              | 0 (0.0%)                         | 1 (5.3%)                       |
| - Blood potassium decreased                          | 0   | 0 (0.0%)                         | 0                                                | 0 (0.0%)                                            | 0                              | 0 (0.0%)                         | 1 (5.3%)                       |
| - Metyrapone challenge test                          | 0   | 0 (0.0%)                         | 0                                                | 0 (0.0%)                                            | 0                              | 0 (0.0%)                         | 1 (5.3%)                       |
| SOC: Metabolism and nutrition disorders              |     |                                  |                                                  |                                                     |                                |                                  |                                |
| - Hyperglycaemia                                     | 0   | 0 (0.0%)                         | 0                                                | 1 (5.3%)                                            | 0                              | 0 (0.0%)                         | 1 (5.3%)                       |
| SOC: Musculoskeletal and connective tissue disorders |     |                                  |                                                  |                                                     |                                |                                  |                                |
| - Back pain                                          | 0   | 0 (0.0%)                         | 0                                                | 0 (0.0%)                                            | 0                              | 0 (0.0%)                         | 1 (5.3%)                       |
| - Pain in extremity                                  | 0   | 0 (0.0%)                         | 0                                                | 0 (0.0%)                                            | 0                              | 0 (0.0%)                         | 2 (5.3%)                       |
| SOC: Nervous system disorders                        |     |                                  |                                                  |                                                     |                                |                                  |                                |
| - Aphasia                                            | 0   | 0 (0.0%)                         | 0                                                | 0 (0.0%)                                            | 0                              | 0 (0.0%)                         | 1 (5.3%)                       |
| - Convulsion                                         | 1   | 1 (5.3%)                         | 0                                                | 0 (0.0%)                                            | 0                              | 0 (0.0%)                         | 3 (15.8%)                      |
| - Epileptic aura                                     | 0   | 0 (0.0%)                         | 0                                                | 0 (0.0%)                                            | 0                              | 0 (0.0%)                         | 1 (5.3%)                       |
| - Headache                                           | 0   | 0 (0.0%)                         | 0                                                | 0 (0.0%)                                            | 0                              | 0 (0.0%)                         | 2 (10.5%)                      |
| - Memory impairment                                  | 0   | 0 (0.0%)                         | 0                                                | 0 (0.0%)                                            | 0                              | 0 (0.0%)                         | 1 (5.3%)                       |
| SOC: Psychiatric disorders                           |     |                                  |                                                  |                                                     |                                |                                  |                                |
| - Depressed mood                                     | 0   | 0 (0.0%)                         | 1 (5.3%)                                         | 0                                                   | 0 (0.0%)                       | 0 (0.0%)                         | 1 (5.3%)                       |
| - Insomnia                                           | 0   | 0 (0.0%)                         | 0                                                | 0 (0.0%)                                            | 0                              | 0 (0.0%)                         | 1 (5.3%)                       |
| SOC: Renal and urinary disorders                     |     |                                  |                                                  |                                                     |                                |                                  |                                |
| - Renal failure                                      | 1   | 1 (5.3%)                         | 0                                                | 0 (0.0%)                                            | 0                              | 0 (0.0%)                         | 2 (10.5%)                      |
| SOC: Respiratory_ thoracic and mediastinal disorders |     |                                  |                                                  |                                                     |                                |                                  |                                |
| - Pneumonia aspiration                               | 0   | 0 (0.0%)                         | 0                                                | 0 (0.0%)                                            | 0                              | 0 (0.0%)                         | 1 (5.3%)                       |
| - Respiratory failure                                | 1   | 1 (5.3%)                         | 0                                                | 0 (0.0%)                                            | 0                              | 0 (0.0%)                         | 2 (10.5%)                      |
| SOC: Skin and subcutaneous tissue disorders          |     |                                  |                                                  |                                                     |                                |                                  |                                |
| - Erythema                                           | 1   | 1 (5.3%)                         | 0                                                | 0 (0.0%)                                            | 0                              | 0 (0.0%)                         | 1 (5.3%)                       |
| - Rash                                               | 0   | 0 (0.0%)                         | 0                                                | 0 (0.0%)                                            | 0                              | 0 (0.0%)                         | 1 (5.3%)                       |
| SOC: Social circumstances                            |     |                                  |                                                  |                                                     |                                |                                  |                                |
| - Stress at work                                     | 0   | 0 (0.0%)                         | 0                                                | 0 (0.0%)                                            | 0                              | 0 (0.0%)                         | 1 (5.3%)                       |

|                                      | # AE | ongoing<br># patients<br>with AE | recovered<br>completely<br># patients<br>with AE | recovered with<br>sequelae<br># patients<br>with AE | death<br># patients<br>with AE | unknown<br># patients<br>with AE | Total<br># patients<br>with AE |
|--------------------------------------|------|----------------------------------|--------------------------------------------------|-----------------------------------------------------|--------------------------------|----------------------------------|--------------------------------|
| SOC: Surgical and medical procedures |      |                                  |                                                  |                                                     |                                |                                  |                                |
| - Endotracheal intubation            | 1    | 1 ( 5.3%)                        | 0                                                | 0 ( 0.0%)                                           | 0                              | 0 ( 0.0%)                        | 1 ( 5.3%)                      |
| - Mechanical ventilation             | 1    | 1 ( 5.3%)                        | 0                                                | 0 ( 0.0%)                                           | 0                              | 0 ( 0.0%)                        | 1 ( 5.3%)                      |
| SOC: Vascular disorders              |      |                                  |                                                  |                                                     |                                |                                  |                                |
| - Flushing                           | 0    | 0 ( 0.0%)                        | 1                                                | 1 ( 5.3%)                                           | 0                              | 0 ( 0.0%)                        | 1 ( 5.3%)                      |
| - Hypertension                       | 0    | 0 ( 0.0%)                        | 0                                                | 0 ( 0.0%)                                           | 0                              | 0 ( 0.0%)                        | 1 ( 5.3%)                      |

10.6.2.3 Adverse events according to outcome

Table 10.6.20: System Organ Class (SOC) according to outcome - group: Placebo

| System organ class                                     | #AE | ongoing<br># patients<br>with AE | recovered<br>completely<br># patients<br>with AE | recovered with<br>sequelae<br># patients<br>with AE | death<br># patients<br>with AE | unknown<br># patients<br>with AE | Total<br># patients<br>with AE |
|--------------------------------------------------------|-----|----------------------------------|--------------------------------------------------|-----------------------------------------------------|--------------------------------|----------------------------------|--------------------------------|
| - Cardiac disorders                                    | 0   | 0 (0.0%)                         | 1 (5.3%)                                         | 0                                                   | 0 (0.0%)                       | 0                                | 1 (5.3%)                       |
| - Congenital, familial and genetic disorders           | 0   | 0 (0.0%)                         | 0                                                | 0 (0.0%)                                            | 0                              | 1 (5.3%)                         | 1 (5.3%)                       |
| - Eye disorders                                        | 1   | 1 (5.3%)                         | 0                                                | 0 (0.0%)                                            | 0                              | 0                                | 1 (5.3%)                       |
| - Gastrointestinal disorders                           | 0   | 0 (0.0%)                         | 5 (31.6%)                                        | 0                                                   | 0 (0.0%)                       | 0                                | 5 (31.6%)                      |
| - General disorders and administration site conditions | 1   | 1 (5.3%)                         | 11 (63.1%)                                       | 0                                                   | 1 (5.3%)                       | 0                                | 13 (73.7%)                     |
| - Hepatobiliary disorders                              | 0   | 0 (0.0%)                         | 0                                                | 0 (0.0%)                                            | 1 (5.3%)                       | 0                                | 1 (5.3%)                       |
| - Infections and infestations                          | 0   | 0 (0.0%)                         | 11 (63.1%)                                       | 0                                                   | 2 (10.5%)                      | 0                                | 13 (73.7%)                     |
| - Injury, poisoning and procedural complications       | 0   | 0 (0.0%)                         | 2 (10.5%)                                        | 0                                                   | 0 (0.0%)                       | 0                                | 2 (10.5%)                      |
| - Investigations                                       | 3   | 1 (5.3%)                         | 5 (28.3%)                                        | 0                                                   | 0 (0.0%)                       | 0                                | 8 (47.4%)                      |
| - Metabolism and nutrition disorders                   | 2   | 2 (10.5%)                        | 1 (5.3%)                                         | 0                                                   | 0 (0.0%)                       | 0                                | 3 (15.8%)                      |
| - Musculoskeletal and connective tissue disorders      | 1   | 1 (5.3%)                         | 1 (5.3%)                                         | 0                                                   | 0 (0.0%)                       | 1 (5.3%)                         | 3 (15.8%)                      |
| - Nervous system disorders                             | 1   | 1 (5.3%)                         | 2 (10.5%)                                        | 1 (5.3%)                                            | 0                              | 1 (5.3%)                         | 5 (28.3%)                      |
| - Psychiatric disorders                                | 2   | 2 (10.5%)                        | 0                                                | 0 (0.0%)                                            | 0                              | 0                                | 2 (10.5%)                      |
| - Renal and urinary disorders                          | 0   | 0 (0.0%)                         | 0                                                | 0 (0.0%)                                            | 1 (5.3%)                       | 0                                | 1 (5.3%)                       |
| - Respiratory, thoracic and mediastinal disorders      | 0   | 0 (0.0%)                         | 2 (10.5%)                                        | 0                                                   | 0 (0.0%)                       | 0                                | 2 (10.5%)                      |
| - Skin and subcutaneous tissue disorders               | 0   | 0 (0.0%)                         | 4 (21.1%)                                        | 0                                                   | 0 (0.0%)                       | 0                                | 4 (21.1%)                      |
| - Surgical and medical procedures                      | 0   | 0 (0.0%)                         | 3 (15.8%)                                        | 0                                                   | 0 (0.0%)                       | 0                                | 3 (15.8%)                      |
| - Vascular disorders                                   | 1   | 1 (5.3%)                         | 2 (10.5%)                                        | 0                                                   | 0 (0.0%)                       | 1 (5.3%)                         | 4 (21.1%)                      |

**Table 10.6.21: System Organ Class (SOC) according to outcome - group: Dexamethasone**

| System organ class                                     | ongoing |                    | recovered completely |                    | recovered with sequelae |                    | death |                    | unknown |                    | Total # patients with AE |
|--------------------------------------------------------|---------|--------------------|----------------------|--------------------|-------------------------|--------------------|-------|--------------------|---------|--------------------|--------------------------|
|                                                        | # AE    | # patients with AE | # AE                 | # patients with AE | # AE                    | # patients with AE | # AE  | # patients with AE | # AE    | # patients with AE |                          |
| - Blood and lymphatic system disorders                 | 0       | 0 (0.0%)           | 1                    | 1 (5.3%)           | 0                       | 0 (0.0%)           | 0     | 0 (0.0%)           | 1       | 1 (5.3%)           | 2 (10.5%)                |
| - Cardiac disorders                                    | 1       | 1 (5.3%)           | 0                    | 0 (0.0%)           | 0                       | 0 (0.0%)           | 0     | 0 (0.0%)           | 0       | 0 (0.0%)           | 1 (5.3%)                 |
| - Ear and labyrinth disorders                          | 1       | 1 (5.3%)           | 0                    | 0 (0.0%)           | 0                       | 0 (0.0%)           | 0     | 0 (0.0%)           | 0       | 0 (0.0%)           | 1 (5.3%)                 |
| - Endocrine disorders                                  | 0       | 0 (0.0%)           | 1                    | 1 (5.3%)           | 0                       | 0 (0.0%)           | 0     | 0 (0.0%)           | 0       | 0 (0.0%)           | 1 (5.3%)                 |
| - Eye disorders                                        | 1       | 1 (5.3%)           | 2                    | 2 (10.5%)          | 0                       | 0 (0.0%)           | 0     | 0 (0.0%)           | 0       | 0 (0.0%)           | 3 (15.8%)                |
| - General disorders and administration site conditions | 4       | 4 (21.1%)          | 3                    | 3 (15.8%)          | 0                       | 0 (0.0%)           | 0     | 0 (0.0%)           | 1       | 1 (5.3%)           | 8 (36.8%)                |
| - Infections and infestations                          | 0       | 0 (0.0%)           | 4                    | 4 (21.1%)          | 0                       | 0 (0.0%)           | 0     | 0 (0.0%)           | 1       | 1 (5.3%)           | 5 (26.3%)                |
| - Injury, poisoning and procedural complications       | 0       | 0 (0.0%)           | 2                    | 1 (5.3%)           | 0                       | 0 (0.0%)           | 0     | 0 (0.0%)           | 0       | 0 (0.0%)           | 2 (10.5%)                |
| - Investigations                                       | 0       | 0 (0.0%)           | 3                    | 2 (10.5%)          | 0                       | 0 (0.0%)           | 0     | 0 (0.0%)           | 0       | 0 (0.0%)           | 3 (15.8%)                |
| - Metabolism and nutrition disorders                   | 0       | 0 (0.0%)           | 1                    | 1 (5.3%)           | 0                       | 0 (0.0%)           | 0     | 0 (0.0%)           | 0       | 0 (0.0%)           | 1 (5.3%)                 |
| - Musculoskeletal and connective tissue disorders      | 0       | 0 (0.0%)           | 3                    | 1 (5.3%)           | 0                       | 0 (0.0%)           | 0     | 0 (0.0%)           | 0       | 0 (0.0%)           | 3 (15.8%)                |
| - Nervous system disorders                             | 4       | 4 (21.1%)          | 3                    | 3 (15.8%)          | 0                       | 0 (0.0%)           | 0     | 0 (0.0%)           | 1       | 1 (5.3%)           | 8 (31.6%)                |
| - Psychiatric disorders                                | 2       | 2 (10.5%)          | 0                    | 0 (0.0%)           | 0                       | 0 (0.0%)           | 0     | 0 (0.0%)           | 0       | 0 (0.0%)           | 2 (10.5%)                |
| - Renal and urinary disorders                          | 0       | 0 (0.0%)           | 1                    | 1 (5.3%)           | 1                       | 1 (5.3%)           | 0     | 0 (0.0%)           | 0       | 0 (0.0%)           | 2 (10.5%)                |
| - Respiratory, thoracic and mediastinal disorders      | 0       | 0 (0.0%)           | 1                    | 1 (5.3%)           | 1                       | 1 (5.3%)           | 1     | 1 (5.3%)           | 0       | 0 (0.0%)           | 3 (15.8%)                |
| - Skin and subcutaneous tissue disorders               | 0       | 0 (0.0%)           | 2                    | 2 (10.5%)          | 0                       | 0 (0.0%)           | 0     | 0 (0.0%)           | 0       | 0 (0.0%)           | 2 (10.5%)                |
| - Social circumstances                                 | 1       | 1 (5.3%)           | 0                    | 0 (0.0%)           | 0                       | 0 (0.0%)           | 0     | 0 (0.0%)           | 0       | 0 (0.0%)           | 1 (5.3%)                 |
| - Surgical and medical procedures                      | 0       | 0 (0.0%)           | 0                    | 0 (0.0%)           | 2                       | 1 (5.3%)           | 0     | 0 (0.0%)           | 0       | 0 (0.0%)           | 2 (10.5%)                |
| - Vascular disorders                                   | 0       | 0 (0.0%)           | 2                    | 2 (10.5%)          | 0                       | 0 (0.0%)           | 0     | 0 (0.0%)           | 0       | 0 (0.0%)           | 2 (10.5%)                |

Table 10.6.22: SOC / PT according to outcome - group: Placebo

|                                                           | #AE | ongoing<br># patients<br>with AE | recovered<br>completely<br># patients<br>with AE | recovered with<br>sequelae<br># patients<br>with AE | death<br># patients<br>with AE | unknown<br># patients<br>with AE | Total<br># patients<br>with AE |
|-----------------------------------------------------------|-----|----------------------------------|--------------------------------------------------|-----------------------------------------------------|--------------------------------|----------------------------------|--------------------------------|
| SOC: Cardiac disorders                                    |     |                                  |                                                  |                                                     |                                |                                  |                                |
| - Atrial fibrillation                                     | 0   | 0 (0.0%)                         | 1 (5.3%)                                         | 0 (0.0%)                                            | 0 (0.0%)                       | 0 (0.0%)                         | 1 (5.3%)                       |
| SOC: Congenital_familial and genetic disorders            |     |                                  |                                                  |                                                     |                                |                                  |                                |
| - Hydrocele                                               | 0   | 0 (0.0%)                         | 0 (0.0%)                                         | 0 (0.0%)                                            | 0 (0.0%)                       | 1 (5.3%)                         | 1 (5.3%)                       |
| SOC: Eye disorders                                        |     |                                  |                                                  |                                                     |                                |                                  |                                |
| - Visual impairment                                       | 1   | 1 (5.3%)                         | 0 (0.0%)                                         | 0 (0.0%)                                            | 0 (0.0%)                       | 0 (0.0%)                         | 1 (5.3%)                       |
| SOC: Gastrointestinal disorders                           |     |                                  |                                                  |                                                     |                                |                                  |                                |
| - Constipation                                            | 0   | 0 (0.0%)                         | 1 (5.3%)                                         | 0 (0.0%)                                            | 0 (0.0%)                       | 0 (0.0%)                         | 1 (5.3%)                       |
| - Diarrhoea                                               | 0   | 0 (0.0%)                         | 1 (5.3%)                                         | 0 (0.0%)                                            | 0 (0.0%)                       | 0 (0.0%)                         | 1 (5.3%)                       |
| - Nausea                                                  | 0   | 0 (0.0%)                         | 1 (5.3%)                                         | 0 (0.0%)                                            | 0 (0.0%)                       | 0 (0.0%)                         | 1 (5.3%)                       |
| - Vomiting                                                | 0   | 0 (0.0%)                         | 2 (10.5%)                                        | 0 (0.0%)                                            | 0 (0.0%)                       | 0 (0.0%)                         | 2 (10.5%)                      |
| SOC: General disorders and administration site conditions |     |                                  |                                                  |                                                     |                                |                                  |                                |
| - Condition aggravated                                    | 0   | 0 (0.0%)                         | 0 (0.0%)                                         | 0 (0.0%)                                            | 1 (5.3%)                       | 0 (0.0%)                         | 1 (5.3%)                       |
| - General physical health deterioration                   | 1   | 1 (5.3%)                         | 0 (0.0%)                                         | 0 (0.0%)                                            | 0 (0.0%)                       | 0 (0.0%)                         | 1 (5.3%)                       |
| - Infusion site extravasation                             | 0   | 0 (0.0%)                         | 1 (5.3%)                                         | 0 (0.0%)                                            | 0 (0.0%)                       | 0 (0.0%)                         | 1 (5.3%)                       |
| - Local swelling                                          | 0   | 0 (0.0%)                         | 1 (5.3%)                                         | 0 (0.0%)                                            | 0 (0.0%)                       | 0 (0.0%)                         | 1 (5.3%)                       |
| - Oedema peripheral                                       | 0   | 0 (0.0%)                         | 1 (5.3%)                                         | 0 (0.0%)                                            | 0 (0.0%)                       | 0 (0.0%)                         | 1 (5.3%)                       |
| - Pain                                                    | 0   | 0 (0.0%)                         | 1 (5.3%)                                         | 0 (0.0%)                                            | 0 (0.0%)                       | 0 (0.0%)                         | 1 (5.3%)                       |
| - Pyrexia                                                 | 0   | 0 (0.0%)                         | 7 (21.1%)                                        | 0 (0.0%)                                            | 0 (0.0%)                       | 0 (0.0%)                         | 7 (21.1%)                      |
| SOC: Hepatobiliary disorders                              |     |                                  |                                                  |                                                     |                                |                                  |                                |
| - Cholangitis                                             | 0   | 0 (0.0%)                         | 0 (0.0%)                                         | 0 (0.0%)                                            | 1 (5.3%)                       | 0 (0.0%)                         | 1 (5.3%)                       |
| SOC: Infections and infestations                          |     |                                  |                                                  |                                                     |                                |                                  |                                |
| - Abscess                                                 | 0   | 0 (0.0%)                         | 0 (0.0%)                                         | 0 (0.0%)                                            | 1 (5.3%)                       | 0 (0.0%)                         | 1 (5.3%)                       |
| - Bacteraemia                                             | 0   | 0 (0.0%)                         | 1 (5.3%)                                         | 0 (0.0%)                                            | 0 (0.0%)                       | 0 (0.0%)                         | 1 (5.3%)                       |
| - Bacterial infection                                     | 0   | 0 (0.0%)                         | 1 (5.3%)                                         | 0 (0.0%)                                            | 0 (0.0%)                       | 0 (0.0%)                         | 1 (5.3%)                       |
| - Brain abscess                                           | 0   | 0 (0.0%)                         | 1 (5.3%)                                         | 0 (0.0%)                                            | 0 (0.0%)                       | 0 (0.0%)                         | 1 (5.3%)                       |
| - Bronchitis                                              | 0   | 0 (0.0%)                         | 1 (5.3%)                                         | 0 (0.0%)                                            | 0 (0.0%)                       | 0 (0.0%)                         | 1 (5.3%)                       |
| - Bronchopneumonia                                        | 0   | 0 (0.0%)                         | 2 (10.5%)                                        | 0 (0.0%)                                            | 0 (0.0%)                       | 0 (0.0%)                         | 2 (10.5%)                      |
| - Herpes simplex                                          | 0   | 0 (0.0%)                         | 1 (5.3%)                                         | 0 (0.0%)                                            | 0 (0.0%)                       | 0 (0.0%)                         | 1 (5.3%)                       |
| - Pneumonia                                               | 0   | 0 (0.0%)                         | 1 (5.3%)                                         | 0 (0.0%)                                            | 1 (5.3%)                       | 0 (0.0%)                         | 2 (10.5%)                      |
| - Sepsis                                                  | 0   | 0 (0.0%)                         | 1 (5.3%)                                         | 0 (0.0%)                                            | 1 (5.3%)                       | 0 (0.0%)                         | 2 (10.5%)                      |
| - Urinary tract infection                                 | 0   | 0 (0.0%)                         | 1 (5.3%)                                         | 0 (0.0%)                                            | 0 (0.0%)                       | 0 (0.0%)                         | 1 (5.3%)                       |

|                                                      | #AE | ongoing<br># patients<br>with AE | recovered<br>completely<br># patients<br>with AE | recovered with<br>sequelae<br># patients<br>with AE | death<br># patients<br>with AE | unknown<br># patients<br>with AE | Total<br># patients<br>with AE |
|------------------------------------------------------|-----|----------------------------------|--------------------------------------------------|-----------------------------------------------------|--------------------------------|----------------------------------|--------------------------------|
| SOC: Injury, poisoning and procedural complications  |     |                                  |                                                  |                                                     |                                |                                  |                                |
| - Fall                                               | 0   | 0 (0.0%)                         | 2 (10.5%)                                        | 0 (0.0%)                                            | 0 (0.0%)                       | 0 (0.0%)                         | 2 (10.5%)                      |
| SOC: Investigations                                  |     |                                  |                                                  |                                                     |                                |                                  |                                |
| - Alanine aminotransferase increased                 | 1   | 1 (5.3%)                         | 0 (0.0%)                                         | 0 (0.0%)                                            | 0 (0.0%)                       | 0 (0.0%)                         | 1 (5.3%)                       |
| - Blood acid phosphatase increased                   | 1   | 1 (5.3%)                         | 0 (0.0%)                                         | 0 (0.0%)                                            | 0 (0.0%)                       | 0 (0.0%)                         | 1 (5.3%)                       |
| - Blood creatinine increased                         | 0   | 0 (0.0%)                         | 1 (5.3%)                                         | 0 (0.0%)                                            | 0 (0.0%)                       | 0 (0.0%)                         | 1 (5.3%)                       |
| - Blood culture positive                             | 0   | 0 (0.0%)                         | 1 (5.3%)                                         | 0 (0.0%)                                            | 0 (0.0%)                       | 0 (0.0%)                         | 1 (5.3%)                       |
| - Body temperature increased                         | 0   | 0 (0.0%)                         | 1 (5.3%)                                         | 0 (0.0%)                                            | 0 (0.0%)                       | 0 (0.0%)                         | 1 (5.3%)                       |
| - C-reactive protein increased                       | 0   | 0 (0.0%)                         | 1 (5.3%)                                         | 0 (0.0%)                                            | 0 (0.0%)                       | 0 (0.0%)                         | 1 (5.3%)                       |
| - Lipase increased                                   | 1   | 1 (5.3%)                         | 0 (0.0%)                                         | 0 (0.0%)                                            | 0 (0.0%)                       | 0 (0.0%)                         | 1 (5.3%)                       |
| - Weight decreased                                   | 0   | 0 (0.0%)                         | 1 (5.3%)                                         | 0 (0.0%)                                            | 0 (0.0%)                       | 0 (0.0%)                         | 1 (5.3%)                       |
| SOC: Metabolism and nutrition disorders              |     |                                  |                                                  |                                                     |                                |                                  |                                |
| - Decreased appetite                                 | 1   | 1 (5.3%)                         | 0 (0.0%)                                         | 0 (0.0%)                                            | 0 (0.0%)                       | 0 (0.0%)                         | 1 (5.3%)                       |
| - Hypokalaemia                                       | 1   | 1 (5.3%)                         | 1 (5.3%)                                         | 0 (0.0%)                                            | 0 (0.0%)                       | 0 (0.0%)                         | 2 (10.5%)                      |
| SOC: Musculoskeletal and connective tissue disorders |     |                                  |                                                  |                                                     |                                |                                  |                                |
| - Muscle contracture                                 | 0   | 0 (0.0%)                         | 0 (0.0%)                                         | 0 (0.0%)                                            | 0 (0.0%)                       | 1 (5.3%)                         | 1 (5.3%)                       |
| - Rhabdomyolysis                                     | 0   | 0 (0.0%)                         | 1 (5.3%)                                         | 0 (0.0%)                                            | 0 (0.0%)                       | 0 (0.0%)                         | 1 (5.3%)                       |
| - Rotator cuff syndrome                              | 1   | 1 (5.3%)                         | 0 (0.0%)                                         | 0 (0.0%)                                            | 0 (0.0%)                       | 0 (0.0%)                         | 1 (5.3%)                       |
| SOC: Nervous system disorders                        |     |                                  |                                                  |                                                     |                                |                                  |                                |
| - Anosmia                                            | 0   | 0 (0.0%)                         | 0 (0.0%)                                         | 0 (0.0%)                                            | 0 (0.0%)                       | 1 (5.3%)                         | 1 (5.3%)                       |
| - Convulsion                                         | 0   | 0 (0.0%)                         | 1 (5.3%)                                         | 0 (0.0%)                                            | 0 (0.0%)                       | 0 (0.0%)                         | 1 (5.3%)                       |
| - Grand mal convulsion                               | 0   | 0 (0.0%)                         | 0 (0.0%)                                         | 1 (5.3%)                                            | 0 (0.0%)                       | 0 (0.0%)                         | 1 (5.3%)                       |
| - Headache                                           | 0   | 0 (0.0%)                         | 1 (5.3%)                                         | 0 (0.0%)                                            | 0 (0.0%)                       | 0 (0.0%)                         | 1 (5.3%)                       |
| - Pleocytosis                                        | 1   | 1 (5.3%)                         | 0 (0.0%)                                         | 0 (0.0%)                                            | 0 (0.0%)                       | 0 (0.0%)                         | 1 (5.3%)                       |
| SOC: Psychiatric disorders                           |     |                                  |                                                  |                                                     |                                |                                  |                                |
| - Depression                                         | 1   | 1 (5.3%)                         | 0 (0.0%)                                         | 0 (0.0%)                                            | 0 (0.0%)                       | 0 (0.0%)                         | 1 (5.3%)                       |
| - Insomnia                                           | 1   | 1 (5.3%)                         | 0 (0.0%)                                         | 0 (0.0%)                                            | 0 (0.0%)                       | 0 (0.0%)                         | 1 (5.3%)                       |
| SOC: Renal and urinary disorders                     |     |                                  |                                                  |                                                     |                                |                                  |                                |
| - Renal failure                                      | 0   | 0 (0.0%)                         | 0 (0.0%)                                         | 0 (0.0%)                                            | 1 (5.3%)                       | 0 (0.0%)                         | 1 (5.3%)                       |

|                                                      | #AE | ongoing<br># patients<br>with AE | recovered<br>completely<br># patients<br>with AE | recovered with<br>sequelae<br># patients<br>with AE | death<br># patients<br>with AE | unknown<br># patients<br>with AE | Total<br># patients<br>with AE |
|------------------------------------------------------|-----|----------------------------------|--------------------------------------------------|-----------------------------------------------------|--------------------------------|----------------------------------|--------------------------------|
| SOC: Respiratory_ thoracic and mediastinal disorders |     |                                  |                                                  |                                                     |                                |                                  |                                |
| - Hiccups                                            | 0   | 0 (0.0%)                         | 1 (5.3%)                                         | 0 (0.0%)                                            | 0 (0.0%)                       | 0 (0.0%)                         | 1 (5.3%)                       |
| - Pulmonary embolism                                 | 0   | 0 (0.0%)                         | 1 (5.3%)                                         | 0 (0.0%)                                            | 0 (0.0%)                       | 0 (0.0%)                         | 1 (5.3%)                       |
| SOC: Skin and subcutaneous tissue disorders          |     |                                  |                                                  |                                                     |                                |                                  |                                |
| - Drug eruption                                      | 0   | 0 (0.0%)                         | 1 (5.3%)                                         | 0 (0.0%)                                            | 0 (0.0%)                       | 0 (0.0%)                         | 1 (5.3%)                       |
| - Erythema                                           | 0   | 0 (0.0%)                         | 1 (5.3%)                                         | 0 (0.0%)                                            | 0 (0.0%)                       | 0 (0.0%)                         | 1 (5.3%)                       |
| - Rash                                               | 0   | 0 (0.0%)                         | 1 (5.3%)                                         | 0 (0.0%)                                            | 0 (0.0%)                       | 0 (0.0%)                         | 1 (5.3%)                       |
| - Skin necrosis                                      | 0   | 0 (0.0%)                         | 1 (5.3%)                                         | 0 (0.0%)                                            | 0 (0.0%)                       | 0 (0.0%)                         | 1 (5.3%)                       |
| SOC: Surgical and medical procedures                 |     |                                  |                                                  |                                                     |                                |                                  |                                |
| - Endotracheal intubation                            | 0   | 0 (0.0%)                         | 1 (5.3%)                                         | 0 (0.0%)                                            | 0 (0.0%)                       | 0 (0.0%)                         | 1 (5.3%)                       |
| - Gastrostomy                                        | 0   | 0 (0.0%)                         | 1 (5.3%)                                         | 0 (0.0%)                                            | 0 (0.0%)                       | 0 (0.0%)                         | 1 (5.3%)                       |
| - Tracheostomy                                       | 0   | 0 (0.0%)                         | 1 (5.3%)                                         | 0 (0.0%)                                            | 0 (0.0%)                       | 0 (0.0%)                         | 1 (5.3%)                       |
| SOC: Vascular disorders                              |     |                                  |                                                  |                                                     |                                |                                  |                                |
| - Deep vein thrombosis                               | 0   | 0 (0.0%)                         | 0 (0.0%)                                         | 0 (0.0%)                                            | 0 (0.0%)                       | 1 (5.3%)                         | 1 (5.3%)                       |
| - Haematoma                                          | 0   | 0 (0.0%)                         | 1 (5.3%)                                         | 0 (0.0%)                                            | 0 (0.0%)                       | 0 (0.0%)                         | 1 (5.3%)                       |
| - Hypertension                                       | 1   | 1 (5.3%)                         | 0 (0.0%)                                         | 0 (0.0%)                                            | 0 (0.0%)                       | 0 (0.0%)                         | 1 (5.3%)                       |
| - Thrombosis                                         | 0   | 0 (0.0%)                         | 1 (5.3%)                                         | 0 (0.0%)                                            | 0 (0.0%)                       | 0 (0.0%)                         | 1 (5.3%)                       |

**Table 10.6.23: SOC / PT according to outcome - group: Dexamethasone**

|                                                                  | #AE | ongoing<br># patients<br>with AE | recovered<br>completely<br># patients<br>with AE | recovered with<br>sequelae<br># patients<br>with AE | death<br># patients<br>with AE | unknown<br># patients<br>with AE | Total<br># patients<br>with AE |
|------------------------------------------------------------------|-----|----------------------------------|--------------------------------------------------|-----------------------------------------------------|--------------------------------|----------------------------------|--------------------------------|
| <b>SOC: Blood and lymphatic system disorders</b>                 |     |                                  |                                                  |                                                     |                                |                                  |                                |
| - Leukocytosis                                                   | 0   | 0 (0.0%)                         | 1 (5.3%)                                         | 0 (0.0%)                                            | 0 (0.0%)                       | 0 (0.0%)                         | 1 (5.3%)                       |
| - Lymphadenopathy                                                | 0   | 0 (0.0%)                         | 0 (0.0%)                                         | 0 (0.0%)                                            | 0 (0.0%)                       | 1 (5.3%)                         | 1 (5.3%)                       |
| <b>SOC: Cardiac disorders</b>                                    |     |                                  |                                                  |                                                     |                                |                                  |                                |
| - Arrhythmia                                                     | 1   | 1 (5.3%)                         | 0 (0.0%)                                         | 0 (0.0%)                                            | 0 (0.0%)                       | 0 (0.0%)                         | 1 (5.3%)                       |
| <b>SOC: Ear and labyrinth disorders</b>                          |     |                                  |                                                  |                                                     |                                |                                  |                                |
| - Tinnitus                                                       | 1   | 1 (5.3%)                         | 0 (0.0%)                                         | 0 (0.0%)                                            | 0 (0.0%)                       | 0 (0.0%)                         | 1 (5.3%)                       |
| <b>SOC: Endocrine disorders</b>                                  |     |                                  |                                                  |                                                     |                                |                                  |                                |
| - Diabetes insipidus                                             | 0   | 0 (0.0%)                         | 1 (5.3%)                                         | 0 (0.0%)                                            | 0 (0.0%)                       | 0 (0.0%)                         | 1 (5.3%)                       |
| <b>SOC: Eye disorders</b>                                        |     |                                  |                                                  |                                                     |                                |                                  |                                |
| - Amblyopia                                                      | 1   | 1 (5.3%)                         | 0 (0.0%)                                         | 0 (0.0%)                                            | 0 (0.0%)                       | 0 (0.0%)                         | 1 (5.3%)                       |
| - Diplopia                                                       | 0   | 0 (0.0%)                         | 1 (5.3%)                                         | 0 (0.0%)                                            | 0 (0.0%)                       | 0 (0.0%)                         | 1 (5.3%)                       |
| - Eye movement disorder                                          | 0   | 0 (0.0%)                         | 1 (5.3%)                                         | 0 (0.0%)                                            | 0 (0.0%)                       | 0 (0.0%)                         | 1 (5.3%)                       |
| <b>SOC: General disorders and administration site conditions</b> |     |                                  |                                                  |                                                     |                                |                                  |                                |
| - Fatigue                                                        | 2   | 2 (10.5%)                        | 0 (0.0%)                                         | 0 (0.0%)                                            | 0 (0.0%)                       | 1 (5.3%)                         | 3 (15.8%)                      |
| - Inflammation                                                   | 1   | 1 (5.3%)                         | 0 (0.0%)                                         | 0 (0.0%)                                            | 0 (0.0%)                       | 0 (0.0%)                         | 1 (5.3%)                       |
| - Pain                                                           | 0   | 0 (0.0%)                         | 1 (5.3%)                                         | 0 (0.0%)                                            | 0 (0.0%)                       | 0 (0.0%)                         | 1 (5.3%)                       |
| - Pyrexia                                                        | 1   | 1 (5.3%)                         | 2 (10.5%)                                        | 0 (0.0%)                                            | 0 (0.0%)                       | 0 (0.0%)                         | 3 (15.8%)                      |
| <b>SOC: Infections and infestations</b>                          |     |                                  |                                                  |                                                     |                                |                                  |                                |
| - Clostridium difficile colitis                                  | 0   | 0 (0.0%)                         | 1 (5.3%)                                         | 0 (0.0%)                                            | 0 (0.0%)                       | 0 (0.0%)                         | 1 (5.3%)                       |
| - Gastroenteritis rotavirus                                      | 0   | 0 (0.0%)                         | 1 (5.3%)                                         | 0 (0.0%)                                            | 0 (0.0%)                       | 0 (0.0%)                         | 1 (5.3%)                       |
| - Herpes simplex meningoencephalitis                             | 0   | 0 (0.0%)                         | 0 (0.0%)                                         | 0 (0.0%)                                            | 0 (0.0%)                       | 1 (5.3%)                         | 1 (5.3%)                       |
| - Herpes zoster                                                  | 0   | 0 (0.0%)                         | 1 (5.3%)                                         | 0 (0.0%)                                            | 0 (0.0%)                       | 0 (0.0%)                         | 1 (5.3%)                       |
| - Pneumonia                                                      | 0   | 0 (0.0%)                         | 1 (5.3%)                                         | 0 (0.0%)                                            | 0 (0.0%)                       | 0 (0.0%)                         | 1 (5.3%)                       |
| <b>SOC: Injury, poisoning and procedural complications</b>       |     |                                  |                                                  |                                                     |                                |                                  |                                |
| - Fall                                                           | 0   | 0 (0.0%)                         | 1 (5.3%)                                         | 0 (0.0%)                                            | 0 (0.0%)                       | 0 (0.0%)                         | 1 (5.3%)                       |
| - Mouth injury                                                   | 0   | 0 (0.0%)                         | 1 (5.3%)                                         | 0 (0.0%)                                            | 0 (0.0%)                       | 0 (0.0%)                         | 1 (5.3%)                       |



|                                                      | #AE | ongoing<br># patients<br>with AE | recovered<br>completely<br># patients<br>with AE | recovered with<br>sequelae<br># patients<br>with AE | death<br># patients<br>with AE | unknown<br># patients<br>with AE | Total<br># patients<br>with AE |
|------------------------------------------------------|-----|----------------------------------|--------------------------------------------------|-----------------------------------------------------|--------------------------------|----------------------------------|--------------------------------|
| SOC: Investigations                                  |     |                                  |                                                  |                                                     |                                |                                  |                                |
| - Blood creatinine increased                         | 0   | 0 (0.0%)                         | 1 (5.3%)                                         | 0 (0.0%)                                            | 0 (0.0%)                       | 0 (0.0%)                         | 1 (5.3%)                       |
| - Blood potassium decreased                          | 0   | 0 (0.0%)                         | 1 (5.3%)                                         | 0 (0.0%)                                            | 0 (0.0%)                       | 0 (0.0%)                         | 1 (5.3%)                       |
| - Metyrapone challenge test                          | 0   | 0 (0.0%)                         | 1 (5.3%)                                         | 0 (0.0%)                                            | 0 (0.0%)                       | 0 (0.0%)                         | 1 (5.3%)                       |
| SOC: Metabolism and nutrition disorders              |     |                                  |                                                  |                                                     |                                |                                  |                                |
| - Hyperglycaemia                                     | 0   | 0 (0.0%)                         | 1 (5.3%)                                         | 0 (0.0%)                                            | 0 (0.0%)                       | 0 (0.0%)                         | 1 (5.3%)                       |
| SOC: Musculoskeletal and connective tissue disorders |     |                                  |                                                  |                                                     |                                |                                  |                                |
| - Back pain                                          | 0   | 0 (0.0%)                         | 1 (5.3%)                                         | 0 (0.0%)                                            | 0 (0.0%)                       | 0 (0.0%)                         | 1 (5.3%)                       |
| - Pain in extremity                                  | 0   | 0 (0.0%)                         | 2 (5.3%)                                         | 0 (0.0%)                                            | 0 (0.0%)                       | 0 (0.0%)                         | 2 (5.3%)                       |
| SOC: Nervous system disorders                        |     |                                  |                                                  |                                                     |                                |                                  |                                |
| - Aphasia                                            | 1   | 1 (5.3%)                         | 0 (0.0%)                                         | 0 (0.0%)                                            | 0 (0.0%)                       | 0 (0.0%)                         | 1 (5.3%)                       |
| - Convulsion                                         | 1   | 1 (5.3%)                         | 2 (10.5%)                                        | 0 (0.0%)                                            | 0 (0.0%)                       | 0 (0.0%)                         | 3 (15.8%)                      |
| - Epileptic aura                                     | 1   | 1 (5.3%)                         | 0 (0.0%)                                         | 0 (0.0%)                                            | 0 (0.0%)                       | 0 (0.0%)                         | 1 (5.3%)                       |
| - Headache                                           | 0   | 0 (0.0%)                         | 1 (5.3%)                                         | 0 (0.0%)                                            | 0 (0.0%)                       | 1 (5.3%)                         | 2 (10.5%)                      |
| - Memory impairment                                  | 1   | 1 (5.3%)                         | 0 (0.0%)                                         | 0 (0.0%)                                            | 0 (0.0%)                       | 0 (0.0%)                         | 1 (5.3%)                       |
| SOC: Psychiatric disorders                           |     |                                  |                                                  |                                                     |                                |                                  |                                |
| - Depressed mood                                     | 1   | 1 (5.3%)                         | 0 (0.0%)                                         | 0 (0.0%)                                            | 0 (0.0%)                       | 0 (0.0%)                         | 1 (5.3%)                       |
| - Insomnia                                           | 1   | 1 (5.3%)                         | 0 (0.0%)                                         | 0 (0.0%)                                            | 0 (0.0%)                       | 0 (0.0%)                         | 1 (5.3%)                       |
| SOC: Renal and urinary disorders                     |     |                                  |                                                  |                                                     |                                |                                  |                                |
| - Renal failure                                      | 0   | 0 (0.0%)                         | 1 (5.3%)                                         | 1 (5.3%)                                            | 0 (0.0%)                       | 0 (0.0%)                         | 2 (10.5%)                      |
| SOC: Respiratory_ thoracic and mediastinal disorders |     |                                  |                                                  |                                                     |                                |                                  |                                |
| - Pneumonia aspiration                               | 0   | 0 (0.0%)                         | 0 (0.0%)                                         | 0 (0.0%)                                            | 1 (5.3%)                       | 0 (0.0%)                         | 1 (5.3%)                       |
| - Respiratory failure                                | 0   | 0 (0.0%)                         | 1 (5.3%)                                         | 1 (5.3%)                                            | 0 (0.0%)                       | 0 (0.0%)                         | 2 (10.5%)                      |
| SOC: Skin and subcutaneous tissue disorders          |     |                                  |                                                  |                                                     |                                |                                  |                                |
| - Erythema                                           | 0   | 0 (0.0%)                         | 1 (5.3%)                                         | 0 (0.0%)                                            | 0 (0.0%)                       | 0 (0.0%)                         | 1 (5.3%)                       |
| - Rash                                               | 0   | 0 (0.0%)                         | 1 (5.3%)                                         | 0 (0.0%)                                            | 0 (0.0%)                       | 0 (0.0%)                         | 1 (5.3%)                       |
| SOC: Social circumstances                            |     |                                  |                                                  |                                                     |                                |                                  |                                |
| - Stress at work                                     | 1   | 1 (5.3%)                         | 0 (0.0%)                                         | 0 (0.0%)                                            | 0 (0.0%)                       | 0 (0.0%)                         | 1 (5.3%)                       |

|                                      | # AE | ongoing<br># patients<br>with AE | recovered<br>completely<br># patients<br>with AE | recovered with<br>sequelae<br># patients<br>with AE | death<br># patients<br>with AE | unknown<br># patients<br>with AE | Total<br># patients<br>with AE |
|--------------------------------------|------|----------------------------------|--------------------------------------------------|-----------------------------------------------------|--------------------------------|----------------------------------|--------------------------------|
| SOC: Surgical and medical procedures |      |                                  |                                                  |                                                     |                                |                                  |                                |
| - Endotracheal intubation            | 0    | 0 (0.0%)                         | 0                                                | 0 (0.0%)                                            | 1                              | 1 (5.3%)                         | 1 (5.3%)                       |
| - Mechanical ventilation             | 0    | 0 (0.0%)                         | 0                                                | 0 (0.0%)                                            | 1                              | 1 (5.3%)                         | 1 (5.3%)                       |
| SOC: Vascular disorders              |      |                                  |                                                  |                                                     |                                |                                  |                                |
| - Flushing                           | 0    | 0 (0.0%)                         | 1                                                | 1 (5.3%)                                            | 0                              | 0 (0.0%)                         | 1 (5.3%)                       |
| - Hypertension                       | 0    | 0 (0.0%)                         | 1                                                | 1 (5.3%)                                            | 0                              | 0 (0.0%)                         | 1 (5.3%)                       |

## 10.7 Applied study medication

### 10.7.1 Full analysis set

**Table 10.7.1: Acyclovir administration (FAS)**

|                   | <b>Placebo<br/>N=19</b> | <b>Dexamethasone<br/>N=19</b> | <b>Total<br/>N=38</b> |
|-------------------|-------------------------|-------------------------------|-----------------------|
| Treatment days    |                         |                               |                       |
| - N               | 19                      | 19                            | 38                    |
| - Mean +/- SD     | 16.1 +/-2.6             | 14.3 +/-4.0                   | 15.2 +/-3.4           |
| - Median          | 15.0                    | 15.0                          | 15.0                  |
| - p25, p75        | 15.0, 17.0              | 14.0, 15.0                    | 14.0, 16.0            |
| - Min, Max        | 13.0, 23.0              | 1.0, 21.0                     | 1.0, 23.0             |
| - Missing         | 0                       | 0                             | 0                     |
| Total amount (mg) |                         |                               |                       |
| - N               | 19                      | 19                            | 38                    |
| - Mean +/- SD     | 35605.3 +/-7384.4       | 31597.4 +/-10349.2            | 33601.3 +/-9097.1     |
| - Median          | 33000.0                 | 33000.0                       | 33000.0               |
| - p25, p75        | 31500.0, 39000.0        | 29250.0, 36000.0              | 30750.0, 37500.0      |
| - Min, Max        | 21500.0, 50250.0        | 2250.0, 46500.0               | 2250.0, 50250.0       |
| - Missing         | 0                       | 0                             | 0                     |

**Table 10.7.2: Dexamethasone/Placebo administration (FAS)**

|                | <b>Placebo<br/>N=19</b> | <b>Dexamethasone<br/>N=19</b> | <b>Total<br/>N=38</b> |
|----------------|-------------------------|-------------------------------|-----------------------|
| Treatment days |                         |                               |                       |
| - 3            | 0 ( 0.0%)               | 1 ( 5.3%)                     | 1 ( 2.6%)             |
| - 4            | 19 (100.0%)             | 18 ( 94.7%)                   | 37 ( 97.4%)           |

## 10.7.2 Per protocol set

**Table 10.7.3: Acyclovir administration (PP set)**

|                   | Placebo<br>N=9    | Dexamethasone<br>N=7 | Total<br>N=16     |
|-------------------|-------------------|----------------------|-------------------|
| Treatment days    |                   |                      |                   |
| - N               | 9                 | 7                    | 16                |
| - Mean +/- SD     | 15.8 +/-1.9       | 14.9 +/-0.7          | 15.4 +/-1.5       |
| - Median          | 15.0              | 15.0                 | 15.0              |
| - p25, p75        | 15.0, 16.0        | 14.0, 15.0           | 14.5, 16.0        |
| - Min, Max        | 14.0, 20.0        | 14.0, 16.0           | 14.0, 20.0        |
| - Missing         | 0                 | 0                    | 0                 |
| Total amount (mg) |                   |                      |                   |
| - N               | 9                 | 7                    | 16                |
| - Mean +/- SD     | 34750.0 +/-3842.6 | 34628.6 +/-4704.1    | 34696.9 +/-4090.3 |
| - Median          | 33750.0           | 33750.0              | 33750.0           |
| - p25, p75        | 33000.0, 35250.0  | 31500.0, 36000.0     | 32250.0, 35625.0  |
| - Min, Max        | 30750.0, 43500.0  | 30000.0, 44400.0     | 30000.0, 44400.0  |
| - Missing         | 0                 | 0                    | 0                 |

**Table 10.7.4: Dexamethasone/Placebo administration (PP set)**

|                | Placebo<br>N=9 | Dexamethasone<br>N=7 | Total<br>N=16 |
|----------------|----------------|----------------------|---------------|
| Treatment days |                |                      |               |
| - 4            | 9 (100.0%)     | 7 (100.0%)           | 16 (100.0%)   |

## 10.8 Study termination

**Table 10.8.1: Study termination (FAS)**

|                                  | Placebo<br>N=19 | Dexamethasone<br>N=19 | Total<br>N=38  |
|----------------------------------|-----------------|-----------------------|----------------|
| Study termination                |                 |                       |                |
| - Completed entire course        | 14 ( 73.7%)     | 12 ( 63.2%)           | 26 ( 68.4%)    |
| - Premature termination          | 5 ( 26.3%)      | 7 ( 36.8%)            | 12 ( 31.6%)    |
| Reason for premature termination |                 |                       |                |
| - Lost to Follow-Up              | 0 ( 0.0%)       | 4 ( 57.1%)            | 4 ( 33.3%)     |
| - Withdrawal of consent          | 2 ( 40.0%)      | 1 ( 14.3%)            | 3 ( 25.0%)     |
| - Serious Adverse Event          | 0 ( 0.0%)       | 1 ( 14.3%)            | 1 ( 8.3%)      |
| - Death                          | 2 ( 40.0%)      | 1 ( 14.3%)            | 3 ( 25.0%)     |
| - Other reason                   | 1 ( 20.0%)      | 0 ( 0.0%)             | 1 ( 8.3%)      |
| - Missing                        | 14              | 12                    | 26             |
| Days in study                    |                 |                       |                |
| - N                              | 19              | 19                    | 38             |
| - Mean +/- SD                    | 333.5 +/-80.6   | 294.0 +/-181.2        | 313.8 +/-139.8 |
| - Median                         | 369.0           | 366.0                 | 368.0          |
| - p25, p75                       | 281.0, 378.0    | 157.0, 390.0          | 232.0, 385.0   |
| - Min, Max                       | 166.0, 438.0    | 4.0, 665.0            | 4.0, 665.0     |
| - Missing                        | 0               | 0                     | 0              |

## 10.9 Other analyses

### 10.9.1 Seizures

#### 10.9.1.1 FAS

**Table 10.9.1: Seizures since last visit (FAS)**

|                           | Placebo<br>N=19 | Dexamethasone<br>N=19 | Total<br>N=38 | p-value              |
|---------------------------|-----------------|-----------------------|---------------|----------------------|
| Discharge/Day 30 Seizures |                 |                       |               |                      |
| - no                      | 13 ( 72.2%)     | 11 ( 64.7%)           | 24 ( 68.6%)   | 0.632 * <sup>1</sup> |
| - yes                     | 5 ( 27.8%)      | 6 ( 35.3%)            | 11 ( 31.4%)   |                      |
| - Missing                 | 1               | 2                     | 3             |                      |
| 6 Months Seizures         |                 |                       |               |                      |
| - no                      | 15 ( 88.2%)     | 12 ( 92.3%)           | 27 ( 90.0%)   | 0.713 * <sup>1</sup> |
| - yes                     | 2 ( 11.8%)      | 1 ( 7.7%)             | 3 ( 10.0%)    |                      |
| - Missing                 | 2               | 6                     | 8             |                      |
| 12 Months Seizures        |                 |                       |               |                      |
| - no                      | 14 (100.0%)     | 11 ( 91.7%)           | 25 ( 96.2%)   | 0.271 * <sup>1</sup> |
| - yes                     | 0 ( 0.0%)       | 1 ( 8.3%)             | 1 ( 3.8%)     |                      |
| - Missing                 | 5               | 7                     | 12            |                      |

\*<sup>1</sup> = chi<sup>2</sup> -test, two-sided

#### 10.9.1.2 PP set

**Table 10.9.2: Seizures since last visit (PP set)**

|                           | Placebo<br>N=9 | Dexamethasone<br>N=7 | Total<br>N=16 | p-value              |
|---------------------------|----------------|----------------------|---------------|----------------------|
| Discharge/Day 30 Seizures |                |                      |               |                      |
| - no                      | 6 ( 75.0%)     | 3 ( 60.0%)           | 9 ( 69.2%)    | 0.569 * <sup>1</sup> |
| - yes                     | 2 ( 25.0%)     | 2 ( 40.0%)           | 4 ( 30.8%)    |                      |
| - Missing                 | 1              | 2                    | 3             |                      |
| 6 Months Seizures         |                |                      |               |                      |
| - no                      | 9 (100.0%)     | 6 (100.0%)           | 15 (100.0%)   |                      |
| - Missing                 | 0              | 1                    | 1             |                      |
| 12 Months Seizures        |                |                      |               |                      |
| - no                      | 7 (100.0%)     | 6 (100.0%)           | 13 (100.0%)   |                      |
| - Missing                 | 2              | 1                    | 3             |                      |

\*<sup>1</sup> = chi<sup>2</sup> -test, two-sided

## 11 References

GACHE Clinical Trial Protocol. German Trial of Acyclovir and Corticosteroids in Herpes-Simplex-Virus-Encephalitis. Clinical Trial Protocol; Final Version 10-02-2009; EudraCT-Nr: 2005-003201-81.

GACHE Statistical Analysis Plan. German Trial of Acyclovir and Corticosteroids in Herpes-Simplex-Virus-Encephalitis. Statistical Analysis Plan; Version 08-04-2014; EudraCT-Nr: 2005-003201-81.

Müller HH, Schäfer H (2001). Adaptive group sequential designs for clinical trials: Combining the advantages of adaptive and of classical group sequential approaches. *Biometrics* 57, 886-891.

O'Brien PC; Fleming TR. (1979). A multiple testing procedure for clinical trials. *Biometrics* 35, 549–556.

Wilson, L. Hareendran, A. Structured Interview for the Modified Rankin Scale – Questionnaire and Guidelines. 2002.

## 12 Listings

### 12.1 Excluded patients

| Patient Identification | Treatment group | Full analysis set (FAS) | Exclusion FAS       | Per protocol set (PP) | Exclusion PP                                                                                                                                                                                                      | Safety set | Exclusion Safety set |
|------------------------|-----------------|-------------------------|---------------------|-----------------------|-------------------------------------------------------------------------------------------------------------------------------------------------------------------------------------------------------------------|------------|----------------------|
| 02-005                 | Dexamethasone   | yes                     |                     | no                    | No month 6 visit done                                                                                                                                                                                             | yes        |                      |
| 03-005                 | Dexamethasone   | yes                     |                     | no                    | Month 6 visit not within +-14 days                                                                                                                                                                                | yes        |                      |
| 03-007                 | Placebo         | yes                     |                     | no                    | Inclusion/Exclusion criteria violated; Month 6 visit not within +-14 days; Excluded from PP set due to contradictory documentation of pre-encephalitis mRS                                                        | yes        |                      |
| 07-047                 | Dexamethasone   | yes                     | No study medication | no                    | Excluded from PP set due to contradictory documentation of exclusion criterion (Barthel Index < 95) and pre-encephalitis Barthel Index                                                                            | yes        |                      |
| 07-102                 | Dexamethasone   | yes                     |                     | no                    | No month 6 visit done                                                                                                                                                                                             | yes        |                      |
| 08-004                 | Dexamethasone   | yes                     |                     | no                    | No month 6 visit done                                                                                                                                                                                             | yes        |                      |
| 08-009                 | Placebo         | yes                     |                     | no                    | No month 6 visit done                                                                                                                                                                                             | yes        |                      |
| 11-001                 | Dexamethasone   | yes                     |                     | no                    | Less than 4 days dexamethasone/placebo treatment; No month 6 visit done                                                                                                                                           | yes        |                      |
| 12-009                 | Dexamethasone   | no                      | No study medication | no                    | Inclusion/Exclusion criteria violated; Less than 4 days dexamethasone/placebo treatment ; No month 6 visit done                                                                                                   | no         | No study medication  |
| 12-092                 | Dexamethasone   | yes                     |                     | no                    | Month 6 visit not within +-14 days                                                                                                                                                                                | yes        |                      |
| 12-093                 | Dexamethasone   | yes                     |                     | no                    | No month 6 visit done                                                                                                                                                                                             | yes        |                      |
| 12-094                 | Placebo         | yes                     |                     | no                    | Patient not entered in randomizer; No month 6 visit done                                                                                                                                                          | yes        |                      |
| 13-001                 | Placebo         | yes                     |                     | no                    | Excluded from PP set due to contradictory documentation of pre-encephalitis mRS                                                                                                                                   | yes        |                      |
| 16-019                 | Placebo         | yes                     |                     | no                    | Inclusion/Exclusion criteria violated; Month 6 visit not within +-14 days; Excluded from PP set due to contradictory documentation of exclusion criterion (Barthel Index < 95) and pre-encephalitis Barthel Index | yes        |                      |
| 16-020                 | Dexamethasone   | yes                     |                     | no                    | Month 6 visit not within +-14 days                                                                                                                                                                                | yes        |                      |



| Patient Identification | Treatment group | Full analysis set (FAS) | Exclusion FAS | Per protocol set (PP) | Exclusion PP                                                                                                                                                                           | Safety set | Exclusion Safety set |
|------------------------|-----------------|-------------------------|---------------|-----------------------|----------------------------------------------------------------------------------------------------------------------------------------------------------------------------------------|------------|----------------------|
| 18-001                 | Placebo         | yes                     |               | no                    | Month 6 visit not within +-14 days;<br>Excluded from PP set due to<br>contradictory documentation of<br>exclusion criterion (Barthel Index < 95)<br>and pre-encephalitis Barthel Index | yes        |                      |
| 19-007                 | Placebo         | yes                     |               | no                    | Excluded from PP set due to<br>contradictory documentation of<br>exclusion criterion (Barthel Index < 95)<br>and pre-encephalitis Barthel Index                                        | yes        |                      |
| 21-005                 | Dexamethasone   | yes                     |               | no                    | Month 6 visit not within +-14 days                                                                                                                                                     | yes        |                      |
| 21-011                 | Dexamethasone   | yes                     |               | no                    | Month 6 visit not within +-14 days                                                                                                                                                     | yes        |                      |
| 21-012                 | Placebo         | yes                     |               | no                    | Month 6 visit not within +-14 days                                                                                                                                                     | yes        |                      |
| 21-013                 | Placebo         | yes                     |               | no                    | Month 6 visit not within +-14 days                                                                                                                                                     | yes        |                      |
| 22-001                 | Placebo         | yes                     |               | no                    | Month 6 visit not within +-14 days;<br>Excluded from PP set due to<br>contradictory documentation of<br>exclusion criterion (Barthel Index < 95)<br>and pre-encephalitis Barthel Index | yes        |                      |
| 26-051                 | Dexamethasone   | yes                     |               | no                    | Month 6 visit not within +-14 days                                                                                                                                                     | yes        |                      |

## 12.2 Adverse events/serious adverse event

| Patient/ID | Sign/symptom              | Onset date | Stop date  | SAE | Severity | Causality to study drug | No action | Dosage change | Study drug interrupted | Study drug discontinued | New therapy added | Conc. therapy changed | Hospitalization | Outcome              |
|------------|---------------------------|------------|------------|-----|----------|-------------------------|-----------|---------------|------------------------|-------------------------|-------------------|-----------------------|-----------------|----------------------|
| 02-005/D   | seizures                  | nk/05/2008 | / /        | no  | severe   | none                    |           |               |                        |                         | yes               |                       |                 | ongoing              |
| 02-005/D   | Fever of unknown origin   | 02/06/2008 | 08/09/2008 | no  | moderate | none                    |           |               |                        |                         | yes               |                       |                 | recovered completely |
| 03-005/D   | back pain                 | 03/07/2008 | 03/07/2008 | no  | moderate | none                    |           |               |                        |                         | yes               |                       |                 | recovered completely |
| 03-005/D   | abnormal fatigue          | 11/02/2009 | 17/02/2009 | yes | moderate | none                    | yes       |               |                        |                         |                   |                       |                 | unknown              |
| 03-005/D   | Leucocytosis 17.4         | 27/06/2008 | 02/07/2008 | no  | moderate | possible                | yes       |               |                        |                         |                   |                       |                 | recovered completely |
| 03-005/D   | pain in left leg          | 03/07/2008 | 07/07/2008 | no  | moderate | none                    |           |               |                        |                         | yes               |                       |                 | recovered completely |
| 03-005/D   | pain in the left leg      | 11/02/2009 | 17/02/2009 | no  | mild     | none                    | yes       |               |                        |                         |                   |                       |                 | recovered completely |
| 03-007/P   | pulmonal infection        | 15/01/2012 | 19/01/2012 | no  | moderate | none                    |           |               |                        |                         | yes               |                       |                 | recovered completely |
| 03-007/P   | pulmonal infection        | 30/04/2012 | 08/05/2012 | yes | moderate | none                    |           |               |                        |                         | yes               |                       |                 | recovered completely |
| 03-007/P   | obstipation               | 18/01/2012 | 20/01/2012 | no  | mild     | none                    |           |               |                        |                         | yes               |                       |                 | recovered completely |
| 03-007/P   | diarrhoea                 | 27/01/2012 | 28/01/2012 | no  | mild     | none                    |           |               |                        |                         | yes               |                       |                 | recovered completely |
| 03-007/P   | hamatoma left eye         | 20/08/2012 | 10/01/2013 | no  | mild     | none                    | yes       |               |                        |                         |                   |                       |                 | recovered completely |
| 03-007/P   | mild headache             | 06/02/2012 | 06/02/2012 | no  | mild     | none                    | yes       |               |                        |                         |                   |                       |                 | recovered completely |
| 03-007/P   | swelling left hand        | 23/01/2012 | 24/01/2012 | no  | mild     | none                    |           |               |                        |                         | yes               |                       |                 | recovered completely |
| 03-007/P   | burning pain              | 01/02/2012 | 01/02/2012 | no  | mild     | none                    | yes       |               |                        |                         |                   |                       |                 | recovered completely |
| 03-007/P   | fever                     | 03/02/2012 | 04/02/2012 | no  | mild     | unlikely                |           |               |                        |                         | yes               |                       |                 | recovered completely |
| 03-007/P   | fever                     | 17/01/2012 | 17/01/2012 | no  | mild     | possible                | yes       |               |                        |                         |                   |                       |                 | recovered completely |
| 03-007/P   | fever                     | 23/01/2012 | 24/01/2012 | no  | mild     | unlikely                | yes       |               |                        |                         |                   |                       |                 | recovered completely |
| 03-007/P   | fever                     | 27/01/2012 | 30/01/2012 | no  | moderate | unlikely                |           |               |                        |                         | yes               |                       |                 | recovered completely |
| 03-007/P   | reduced general condition | 12/01/2012 | / /        | no  | severe   | none                    | yes       |               |                        |                         |                   |                       |                 | ongoing              |
| 07-017/P   | nausea                    | 08/08/2008 | 08/08/2008 | no  | mild     | not assessable          |           |               |                        |                         | yes               |                       |                 | recovered completely |

| Patient ID | Signs/symptom                                                  | Onset date | Stop date  | SAE | Severity | Causality to study drug | No action | Dosage change | Study drug interrupted | Study drug discontinued | New therapy added | Conc. therapy changed | Hospitalization | Outcome              |
|------------|----------------------------------------------------------------|------------|------------|-----|----------|-------------------------|-----------|---------------|------------------------|-------------------------|-------------------|-----------------------|-----------------|----------------------|
| 07-017/P   | vomiting                                                       | 08/08/2008 | 08/08/2008 | no  | mild     | not assessable          |           |               |                        |                         | yes               |                       |                 | recovered completely |
| 07-102/D   | Progression of symptoms and inflammation to contralateral side | 05/11/2009 | nk/nk/nk   | yes | severe   | not assessable          |           |               |                        |                         | yes               |                       |                 | unknown              |
| 08-004/D   | Diabetes Insipidus                                             | 30/12/2009 | 10/01/2010 | no  | moderate | unlikely                |           |               |                        |                         | yes               |                       |                 | recovered completely |
| 08-004/D   | Fever (Central)                                                | 03/01/2010 | 12/01/2010 | no  | mild     | none                    |           |               |                        |                         | yes               |                       |                 | ongoing              |
| 08-009/P   | bakteriemia                                                    | 18/06/2010 | 28/06/2010 | no  | mild     | unlikely                |           |               |                        |                         |                   | yes                   |                 | recovered completely |
| 08-009/P   | positive bloodcultures                                         | 18/06/2010 | 28/06/2010 | no  | mild     | unlikely                |           |               |                        |                         |                   | yes                   |                 | recovered completely |
| 08-009/P   | Exanthema                                                      | 22/06/2010 | 29/06/2010 | no  | mild     | possible                |           |               |                        |                         | yes               |                       |                 | recovered completely |
| 08-009/P   | Rhabdomyolysis                                                 | 21/06/2010 | 23/06/2010 | no  | mild     | unlikely                |           |               |                        |                         |                   | yes                   |                 | recovered completely |
| 11-001/D   | Flush                                                          | 12/01/2009 | 13/01/2009 | no  | mild     | possible                |           |               |                        |                         |                   |                       |                 | recovered completely |
| 12-063/D   | Doppelbilder                                                   | 11/10/2010 | nk/032011  | no  | mild     | none                    |           |               |                        |                         | yes               |                       |                 | recovered completely |
| 12-063/D   | Pneumonie                                                      | 01/04/2010 | 14/04/2010 | no  | severe   | none                    |           |               |                        |                         |                   |                       |                 | recovered completely |
| 12-063/D   | respirat. Insuff.                                              | 01/04/2010 | 19/05/2010 | no  | severe   | none                    |           |               |                        |                         |                   |                       |                 | recovered completely |
| 12-064/P   | lost of smell                                                  | nk/102010  | nk/nk/nk   | no  | mild     | none                    |           |               |                        |                         |                   |                       |                 | unknown              |
| 12-092/D   | arrhythmia requiring pacemaker                                 | 18/03/2011 | / /        | no  | mild     | none                    |           |               |                        |                         |                   |                       |                 | ongoing              |
| 12-094/P   | Abscess                                                        | 17/11/2011 | 20/11/2011 | yes | severe   | none                    |           |               |                        |                         |                   |                       |                 | death                |
| 12-094/P   | Cholangitis                                                    | 17/11/2011 | 20/11/2011 | yes | severe   | none                    |           |               |                        |                         |                   |                       |                 | death                |
| 12-094/P   | renal failure                                                  | 19/11/2011 | 20/11/2011 | yes | severe   | none                    |           |               |                        |                         |                   |                       |                 | death                |
| 12-094/P   | sepsis                                                         | 18/11/2011 | 20/11/2011 | yes | severe   | none                    |           |               |                        |                         |                   |                       |                 | death                |
| 13-001/P   | Fall                                                           | 10/11/2007 | 10/11/2007 | no  | mild     | none                    |           |               |                        |                         |                   |                       |                 | recovered completely |
| 13-001/P   | hypertension                                                   | nk/122007  | / /        | no  | moderate | unlikely                |           |               |                        |                         |                   |                       |                 | ongoing              |
| 13-001/P   | CSF pleocytosis                                                | 14/11/2007 | / /        | no  | mild     | none                    |           |               |                        |                         | yes               |                       |                 | ongoing              |
| 13-001/P   | shoulder impingement                                           | 22/11/2007 | / /        | no  | moderate | unlikely                |           |               |                        |                         |                   |                       |                 | ongoing              |
| 13-001/P   | vision problems                                                | 15/04/2008 | / /        | no  | mild     | unlikely                |           |               |                        |                         |                   |                       |                 | ongoing              |
| 13-001/P   | weight loss                                                    | 21/11/2007 | 28/11/2008 | no  | mild     | none                    |           |               |                        |                         |                   |                       |                 | recovered completely |
| 13-001/P   | loss of appetite                                               | 21/11/2007 | / /        | no  | mild     | none                    |           |               |                        |                         |                   |                       |                 | ongoing              |

| Patient ID | Sign/symptom                                           | Onset date | Stop date  | SAE | Severity | Causality to study drug | No action | Dosage change | Study drug interrupted | Study drug discontinued | New therapy added | Conc. therapy changed | Hospitalization | Outcome              |
|------------|--------------------------------------------------------|------------|------------|-----|----------|-------------------------|-----------|---------------|------------------------|-------------------------|-------------------|-----------------------|-----------------|----------------------|
| 13-002/P   | Tachyarrhythmia absoluta                               | 10/02/2011 | 17/02/2011 | no  | moderate | none                    |           |               |                        |                         | yes               |                       |                 | recovered completely |
| 13-002/P   | drastic worsening of patient's condition               | nk/1/2011  | 24/11/2011 | yes | severe   | none                    | yes       |               |                        |                         |                   |                       |                 | death                |
| 13-002/P   | drug eczema                                            | 18/02/2011 | 21/02/2011 | no  | mild     | none                    |           |               |                        |                         |                   |                       | yes             | recovered completely |
| 13-002/P   | Hydrocele testis                                       | 22/02/2011 | / /        | no  | mild     | none                    | yes       |               |                        |                         |                   |                       |                 | unknown              |
| 13-002/P   | recurrent pneumonia                                    | 11/02/2011 | 04/03/2011 | no  | moderate | none                    |           |               |                        |                         | yes               |                       |                 | recovered completely |
| 13-002/P   | pulmonary embolism                                     | 16/02/2011 | 16/02/2011 | no  | moderate | none                    |           |               |                        |                         |                   | yes                   |                 | recovered completely |
| 13-002/P   | urinary tract infection                                | 31/03/2011 | 09/04/2011 | no  | mild     | none                    |           |               |                        |                         | yes               |                       |                 | recovered completely |
| 13-002/P   | deep vene thrombosis                                   | 15/02/2011 | / /        | no  | moderate | none                    |           |               |                        |                         |                   | yes                   |                 | unknown              |
| 13-002/P   | slight contractures head/neck                          | 18/08/2011 | / /        | no  | moderate | none                    | yes       |               |                        |                         |                   |                       |                 | unknown              |
| 13-003/D   | Repeated epigastric epileptic auras                    | 09/09/2011 | / /        | no  | mild     | none                    |           |               |                        |                         | yes               |                       |                 | ongoing              |
| 13-003/D   | Fatigue                                                | 09/09/2011 | / /        | no  | mild     | none                    |           |               |                        |                         | yes               |                       |                 | ongoing              |
| 13-003/D   | professional stress                                    | 09/09/2011 | / /        | no  | mild     | none                    |           |               |                        |                         | yes               |                       |                 | ongoing              |
| 13-004/D   | Clostridium difficile enterocolitis                    | 20/07/2011 | 02/08/2011 | no  | moderate | unlikely                |           |               |                        |                         | yes               |                       |                 | recovered completely |
| 13-004/D   | Headach                                                | 01/12/2011 | 31/05/2012 | no  | mild     | none                    | yes       |               |                        |                         |                   |                       |                 | recovered completely |
| 16-009/D   | Depressive mood disorder                               | 11/11/2007 | / /        | no  | mild     | possible                |           |               |                        |                         | yes               |                       |                 | ongoing              |
| 16-009/D   | Hyperglycemia with requirement of subcutaneous insulin | 03/11/2007 | 07/11/2007 | no  | mild     | probable                |           |               |                        |                         | yes               |                       |                 | recovered completely |
| 16-009/D   | Pain, unspecified                                      | 14/11/2007 | 14/11/2007 | no  | mild     | none                    |           |               |                        |                         | yes               |                       |                 | recovered completely |
| 16-009/D   | Aspiration Pneumonia                                   | 23/11/2007 | 11/12/2007 | yes | severe   | none                    |           | yes           |                        |                         |                   |                       |                 | death                |
| 16-009/D   | Inflammation left forearm                              | 14/11/2007 | / /        | no  | mild     | none                    |           |               |                        |                         | yes               |                       |                 | ongoing              |
| 16-019/P   | New HSV-lesions                                        | 10/01/2012 | 18/01/2012 | yes | mild     | none                    |           |               |                        |                         |                   |                       | yes             | recovered completely |
| 16-019/P   | Hypokaliemia                                           | 09/05/2011 | / /        | no  | mild     | none                    |           |               |                        |                         | yes               |                       |                 | ongoing              |
| 16-019/P   | Sleeping disorder                                      | 09/05/2011 | / /        | no  | mild     | none                    |           |               |                        |                         | yes               |                       |                 | recovered completely |
| 16-019/P   | Edema right arm                                        | 16/05/2011 | 16/05/2011 | no  | mild     | none                    | yes       |               |                        |                         |                   |                       |                 | recovered completely |
| 16-019/P   | Chlamylobacter infection                               | 12/05/2011 | 26/05/2011 | no  | mild     | none                    |           |               |                        |                         | yes               |                       |                 | recovered completely |

| Patient ID | Sign/symptom                        | Onset date | Stop date  | SAE | Severity | Causality to study drug | No action | Dosage change | Study drug interrupted | Study drug discontinued | New therapy added | Conc. therapy changed | Hospitalization | Outcome                 |
|------------|-------------------------------------|------------|------------|-----|----------|-------------------------|-----------|---------------|------------------------|-------------------------|-------------------|-----------------------|-----------------|-------------------------|
| 16-020/D   | Fall                                | 06/06/2011 | 06/06/2011 | no  | moderate | none                    | yes       |               |                        |                         |                   |                       |                 | recovered completely    |
| 16-020/D   | Planned Metopiron testing           | 23/03/2012 | 25/03/2012 | yes | mild     | none                    | yes       |               |                        |                         |                   |                       |                 | recovered completely    |
| 16-020/D   | Exirtipation Hypophysenadenoma      | 23/01/2012 | 30/01/2012 | yes | moderate | none                    | yes       |               |                        |                         |                   |                       |                 | recovered completely    |
| 16-020/D   | Laceration upper lip                | 06/06/2011 | 13/06/2011 | no  | moderate | none                    | yes       |               |                        |                         |                   |                       |                 | recovered completely    |
| 16-021/P   | Suspected brain abscess             | 12/01/2012 | 17/01/2012 | yes | moderate | none                    | yes       |               |                        |                         |                   |                       |                 | recovered completely    |
| 19-010/D   | seizure                             | 24/06/2009 | 24/06/2009 | no  | moderate | unlikely                |           |               |                        | yes                     |                   |                       |                 | recovered completely    |
| 19-010/D   | renal failure                       | 16/07/2009 | 06/08/2009 | yes | severe   | none                    |           |               |                        |                         |                   |                       | yes             | recovered with sequelae |
| 19-010/D   | respiratory insufficiency           | 25/06/2009 | 05/08/2009 | yes | moderate | unlikely                | yes       |               |                        |                         |                   |                       |                 | recovered with sequelae |
| 19-010/D   | bulbus deviation                    | 01/07/2009 | 21/12/2009 | no  | mild     | none                    | yes       |               |                        |                         |                   |                       |                 | recovered completely    |
| 19-010/D   | ventilated mechanically             | 25/06/2009 | 05/08/2009 | yes | moderate | unlikely                | yes       |               |                        |                         |                   |                       |                 | recovered with sequelae |
| 19-010/D   | need to be intubated                | 25/06/2009 | 05/08/2009 | yes | moderate | unlikely                | yes       |               |                        |                         |                   |                       |                 | recovered with sequelae |
| 20-004/P   | depression                          | nk/112008  | / /        | no  | moderate | none                    |           |               |                        | yes                     |                   |                       |                 | ongoing                 |
| 20-004/P   | herpes simplex                      | nk/nk2009  | nk/032009  | no  | moderate | none                    |           |               |                        | yes                     |                   |                       |                 | recovered completely    |
| 20-004/P   | Hypopodassemia                      | 29/07/2008 | 01/08/2008 | no  | moderate | none                    |           |               |                        | yes                     |                   |                       |                 | recovered completely    |
| 20-004/P   | fever                               | 29/07/2008 | nk/082008  | no  | moderate | none                    |           |               |                        | yes                     |                   |                       |                 | recovered completely    |
| 21-004/P   | Elevated bodytemperature (<39,5 C)  | 17/07/2008 | 19/07/2008 | no  | mild     | none                    |           |               |                        | yes                     |                   |                       |                 | recovered completely    |
| 21-004/P   | 1. Grand mal/epilepsy               | 18/07/2008 | 18/07/2008 | no  | moderate | unlikely                |           |               |                        | yes                     |                   |                       |                 | recovered with sequelae |
| 21-004/P   | Singultus                           | 24/07/2008 | 04/08/2008 | no  | mild     | none                    |           |               |                        | yes                     |                   |                       |                 | recovered completely    |
| 21-004/P   | High fever (40 C)                   | 03/08/2008 | 07/08/2008 | no  | moderate | none                    |           |               |                        | yes                     |                   |                       |                 | recovered completely    |
| 21-004/P   | Sepsis                              | 06/08/2008 | 10/08/2008 | yes | severe   | none                    |           |               |                        | yes                     |                   |                       | yes             | recovered completely    |
| 21-004/P   | Thrombosis of V. jugularis int. lt. | 06/08/2008 | 10/08/2008 | yes | severe   | none                    |           |               |                        | yes                     |                   |                       | yes             | recovered completely    |

| Patient ID | Sign/symptom                         | Onset date | Stop date  | SAE | Severity | Causality to study drug | No action | Dosage change | Study drug interrupted | Study drug discontinued | New therapy added | Conc. therapy changed | Hospital-ization | Outcome              |
|------------|--------------------------------------|------------|------------|-----|----------|-------------------------|-----------|---------------|------------------------|-------------------------|-------------------|-----------------------|------------------|----------------------|
| 21-005/D   | Erythema (periumbilical)             | 24/04/2009 | nk/05/2009 | no  | mild     | unlikely                |           |               |                        |                         | yes               |                       |                  | recovered completely |
| 21-005/D   | Renal insufficiency                  | 20/04/2009 | nk/05/2009 | no  | mild     | unlikely                |           |               |                        |                         |                   | yes                   |                  | recovered completely |
| 21-008/P   | ongoing seizures (non-konvuls state) | 24/09/2009 | 28/09/2009 | no  | moderate | none                    |           |               |                        |                         | yes               |                       |                  | recovered completely |
| 21-008/P   | skin necrosis left hand              | 28/09/2009 | 03/11/2009 | no  | moderate | none                    |           |               |                        |                         | yes               |                       |                  | recovered completely |
| 21-008/P   | Tracheotomy                          | 07/10/2009 | //12/2009  | no  | moderate | none                    |           |               |                        |                         | yes               |                       |                  | recovered completely |
| 21-008/P   | PEG                                  | 22/10/2009 | 25/02/2010 | no  | moderate | none                    |           |               |                        |                         | yes               |                       |                  | recovered completely |
| 21-008/P   | paravasate of phenytoin              | 28/09/2009 | 03/11/2009 | no  | moderate | none                    |           |               |                        |                         | yes               |                       |                  | recovered completely |
| 21-008/P   | Intubation                           | 24/09/2009 | 07/10/2009 | no  | severe   | none                    |           |               |                        |                         | yes               |                       |                  | recovered completely |
| 21-011/D   | creatinine increased                 | 19/02/2010 | 21/02/2010 | no  | mild     | unlikely                |           | yes           |                        |                         |                   |                       |                  | recovered completely |
| 21-011/D   | low potassium                        | 20/02/2010 | 23/02/2010 | no  | mild     | none                    |           |               |                        |                         | yes               |                       |                  | recovered completely |
| 21-011/D   | Diarrhea, Noro-Virusinfection        | 17/02/2010 | 22/02/2010 | no  | moderate | none                    | yes       |               |                        |                         |                   |                       |                  | recovered completely |
| 21-013/P   | rise of creatinine                   | 07/03/2012 | 09/03/2012 | no  | mild     | none                    |           |               |                        |                         |                   |                       | yes              | recovered completely |
| 26-010/P   | GPT increased >330 U/L               | 17/03/2008 | / /        | no  | moderate | none                    |           |               |                        |                         |                   |                       | yes              | ongoing              |
| 26-010/P   | AP increased                         | 20/03/2008 | / /        | no  | mild     | none                    | yes       |               |                        |                         |                   |                       |                  | ongoing              |
| 26-010/P   | bronchitis                           | 13/03/2008 | 27/03/2008 | no  | moderate | none                    |           |               |                        |                         |                   |                       | yes              | recovered completely |
| 26-010/P   | CRP increased >70 mg/l               | 14/03/2008 | 25/03/2008 | no  | mild     | none                    | yes       |               |                        |                         |                   |                       |                  | recovered completely |
| 26-010/P   | fall                                 | 22/03/2008 | 22/03/2008 | no  | mild     | none                    | yes       |               |                        |                         |                   |                       |                  | recovered completely |
| 26-010/P   | Lipase increased                     | 20/03/2008 | / /        | no  | mild     | none                    | yes       |               |                        |                         |                   |                       |                  | ongoing              |
| 26-010/P   | recurrent fever                      | 13/03/2008 | 27/03/2008 | no  | moderate | none                    |           |               |                        |                         |                   |                       | yes              | recovered completely |
| 26-010/P   | skin rash                            | 19/03/2008 | 22/03/2008 | no  | mild     | none                    |           |               |                        |                         |                   |                       | yes              | recovered completely |
| 26-010/P   | vomiting                             | 16/03/2008 | 16/03/2008 | no  | mild     | none                    |           |               |                        |                         | yes               |                       |                  | recovered completely |
| 26-013/D   | sleep disorder                       | nk/10/2008 | / /        | no  | mild     | none                    | yes       |               |                        |                         |                   |                       |                  | ongoing              |
| 26-013/D   | Tinnitus                             | 12/03/2009 | / /        | no  | mild     | none                    | yes       |               |                        |                         |                   |                       |                  | ongoing              |

| Patid/D  | Sign/symptom                                         | Onset date | Stop date  | SAE | Severity | Causality to study drug | No action | Dosage change | Study drug interrupted | Study drug discontinued | New therapy added | Conc. therapy changed | Hospital-ization | Outcome              |
|----------|------------------------------------------------------|------------|------------|-----|----------|-------------------------|-----------|---------------|------------------------|-------------------------|-------------------|-----------------------|------------------|----------------------|
| 26-030/D | motoric aphasia<br>intermittend                      | 13/10/2008 | / /        | no  | mild     | none                    | yes       |               |                        |                         |                   |                       |                  | ongoing              |
| 26-030/D | Seizure (nonconvulsive)                              | 10/10/2008 | 10/10/2008 | no  | moderate | none                    |           |               |                        |                         | yes               |                       |                  | recovered completely |
| 26-030/D | Fatigue intermittend                                 | 13/10/2008 | / /        | no  | mild     | none                    | yes       |               |                        |                         |                   |                       |                  | ongoing              |
| 26-030/D | Herpes Zosta                                         | nk/122008  | nk/032009  | no  | moderate | none                    |           |               |                        |                         | yes               |                       |                  | recovered completely |
| 26-030/D | Swelling of the right<br>supraclavicular lymph nodes | 12/10/2009 | nk/nk/nk   | no  | mild     | none                    | yes       |               |                        |                         |                   |                       |                  | unknown              |
| 26-051/D | amblyopia                                            | //122011   | / /        | no  | mild     | none                    | yes       |               |                        |                         |                   |                       |                  | ongoing              |
| 26-051/D | headache                                             | //032011   | nk/nk/nk   | no  | mild     | none                    | yes       |               |                        |                         |                   |                       |                  | unknown              |
| 26-051/D | arterial hypertension                                | //032011   | nk/nk/nk   | no  | mild     | none                    | yes       |               |                        |                         |                   |                       |                  | recovered completely |
| 26-051/D | memory disorders                                     | //062011   | nk/nk/nk   | no  | moderate | none                    | yes       |               |                        |                         |                   |                       |                  | ongoing              |
| 26-051/D | Fever 39 grade C                                     | 16/02/2011 | 16/02/2011 | no  | mild     | none                    | yes       |               |                        |                         |                   |                       |                  | recovered completely |

## 13 Appendix

### 13.1 Original SAS® output for primary endpoint

| <i>Table of binary_mRS_LOCF_original by group</i> |                     |                      |              |
|---------------------------------------------------|---------------------|----------------------|--------------|
| <i>binary_mRS_LOCF_original(mRS)</i>              | <i>group(Group)</i> |                      |              |
| <i>Frequency</i>                                  |                     |                      |              |
| <i>Percent</i>                                    |                     |                      |              |
| <i>Col Pct</i>                                    | <i>Placebo</i>      | <i>Dexamethasone</i> | <i>Total</i> |
| <i>&lt;=2</i>                                     | 12                  | 12                   | 24           |
|                                                   | 31.58               | 31.58                | 63.16        |
|                                                   | 63.16               | 63.16                |              |
| <i>&gt;2</i>                                      | 7                   | 7                    | 14           |
|                                                   | 18.42               | 18.42                | 36.84        |
|                                                   | 36.84               | 36.84                |              |
| <i>Total</i>                                      | 19                  | 19                   | 38           |
|                                                   | 50.00               | 50.00                | 100.00       |

#### **Statistics for Table of binary\_mRS\_LOCF by group**

| <i>Statistic</i>                   | <i>DF</i> | <i>Value</i> | <i>Prob</i> |
|------------------------------------|-----------|--------------|-------------|
| <i>Chi-Square</i>                  | 1         | 0.0000       | 1.0000      |
| <i>Likelihood Ratio Chi-Square</i> | 1         | 0.0000       | 1.0000      |
| <i>Continuity Adj. Chi-Square</i>  | 1         | 0.0000       | 1.0000      |
| <i>Mantel-Haenszel Chi-Square</i>  | 1         | 0.0000       | 1.0000      |
| <i>Phi Coefficient</i>             |           | 0.0000       |             |
| <i>Contingency Coefficient</i>     |           | 0.0000       |             |
| <i>Cramer's V</i>                  |           | 0.0000       |             |

#### *Fisher's Exact Test*

|                                 |        |
|---------------------------------|--------|
| <i>Cell (1,1) Frequency (F)</i> | 12     |
| <i>Left-sided Pr &lt;= F</i>    | 0.6313 |
| <i>Right-sided Pr &gt;= F</i>   | 0.6313 |
| <i>Table Probability (P)</i>    | 0.2626 |
| <i>Two-sided Pr &lt;= P</i>     | 1.0000 |

**Sample Size = 38**



## Unresolved Data Issues

### Derivation of scores

In cases where total scores and the respective single items were documented in the CRF, total scores will also be derived from single items of a questionnaire/index. The calculated score will be used in case of contradictions between calculated and documented total scores. If at least one single item is missing, the total score is set to missing.

### Other unresolved issues

| Patient                                     | Unresolved Issue                                                                                                                                                                      | Handling                                                                                                                                                                                                   |
|---------------------------------------------|---------------------------------------------------------------------------------------------------------------------------------------------------------------------------------------|------------------------------------------------------------------------------------------------------------------------------------------------------------------------------------------------------------|
| Pre-encephalitis<br>Barthel Index<br>07-047 | Pre-encephalitis Barthel Index = 10<br>Exclusion criterion 'Barthel Index < 95' documented as 'no'.                                                                                   | Included in FAS.<br>Excluded from PP set due to contradictory documentation of exclusion criterion (Barthel Index < 95) and pre-encephalitis Barthel index.                                                |
| 16-019                                      | Documented pre-encephalitis Barthel Index = 100.<br>From single items calculated pre-encephalitis Barthel Index = 90.<br>Exclusion criterion 'Barthel Index < 95' documented as 'no'. | Included in FAS.<br>Score will be calculated from single items.<br>Excluded from PP set due to contradictory documentation of exclusion criterion (Barthel Index < 95) and pre-encephalitis Barthel index. |
| 18-001                                      | Pre-encephalitis Barthel Index = 25.<br>Exclusion criterion 'Barthel Index < 95' documented as 'no'.                                                                                  | Included in FAS.<br>Excluded from PP set due to contradictory documentation of exclusion criterion (Barthel Index < 95) and pre-encephalitis Barthel index.                                                |
| 19-007                                      | Documented pre-encephalitis Barthel Index = 0.<br>From single items calculated pre-encephalitis Barthel Index = 20.<br>Exclusion criterion 'Barthel Index < 95' documented as 'no'.   | Included in FAS.<br>Score will be calculated from single items.<br>Excluded from PP set due to contradictory documentation of exclusion criterion (Barthel Index < 95) and pre-encephalitis Barthel index. |

|                             |                                                                                                                                                                                                                                             |                                                                                                                                                                   |
|-----------------------------|---------------------------------------------------------------------------------------------------------------------------------------------------------------------------------------------------------------------------------------------|-------------------------------------------------------------------------------------------------------------------------------------------------------------------|
| 22-001                      | Pre-encephalitis Barthel Index = 90.<br>Exclusion criterion 'Barthel Index < 95' documented as 'no'.                                                                                                                                        | Included in FAS.<br>Excluded from PP set due to contradictory documentation of exclusion criterion (Barthel Index < 95) and pre-encephalitis Barthel index.       |
| <b>Pre-encephalitis mRS</b> |                                                                                                                                                                                                                                             |                                                                                                                                                                   |
| 03-007                      | Documented pre-encephalitis mRS = 2 at baseline.<br>Pre-encephalitis mRS > 2 according to mRS questionnaire documentation at visit 4.<br>Exclusion criterion 'mRS > 2' documented as 'no'.                                                  | Included in FAS.<br>Excluded from PP set due to contradictory documentation of pre-encephalitis mRS.                                                              |
| 13-001                      | Documented pre-encephalitis mRS = 0 at baseline.<br>Pre-encephalitis mRS > 2 according to mRS questionnaire documentation at visit 4.<br>Exclusion criterion 'mRS > 2' documented as 'no'.                                                  | Included in FAS.<br>Excluded from PP set due to contradictory documentation of pre-encephalitis mRS.                                                              |
| <b>mRS visit 4</b>          |                                                                                                                                                                                                                                             |                                                                                                                                                                   |
| 03-005                      | According to documentation, patient was not looking after family at home before encephalitis but patient's ability to look after family at home was reduced after encephalitis.<br>Depending on handling of this item mRS is either 2 or 1. | mRS is set to 1.<br>Scoring will be done according to manual and question will be skipped since patient has not been looking after family before encephalitis.    |
| 12-033                      | According to documentation, patient was not working or seeking work before encephalitis but has a reduced level of work after encephalitis.<br>Depending on handling of this item mRS is either 2 or 1.                                     | mRS is set to 1.<br>Scoring will be done according to manual and question will be skipped since patient has not been working or seeking work before encephalitis. |
| <b>mRS visit 5</b>          |                                                                                                                                                                                                                                             |                                                                                                                                                                   |
| 12-033                      | According to documentation, patient was not working or seeking work before encephalitis but has a reduced level of work after encephalitis.<br>Depending on handling of this item mRS is either 2 or 1.                                     | mRS is set to 1.<br>Scoring will be done according to manual and question will be skipped since patient has not been working or seeking work before encephalitis. |

|               |        |                                                                                                                                                           |                                                                                                    |
|---------------|--------|-----------------------------------------------------------------------------------------------------------------------------------------------------------|----------------------------------------------------------------------------------------------------|
| <b>Others</b> | 08-004 | Baseline: GCS<br>Implausible item 'Verbal' (documented response = 0; range: 1 to 5).<br>Documented total score = 9 (Eye opening = 3, motor response = 6). | Total GCS and GCS verbal score set to missing due to implausible item 'Verbal'.                    |
|               | 07-017 | Day 0: GCS<br>Implausible item 'Verbal' (documented response = 6; range: 1 to 5).<br>Implausible documented total score = 16 (range: 3 to 15).            | Total GCS and GCS verbal score set to missing due to implausible item 'Verbal'.                    |
|               | 19-007 | Visit 4: NIH<br>Items 'Limb ataxia' and 'Sensory' are missing (CRF documentation: 'not scored').<br>Documented total score (= 19) ignores missing items.  | Unknown total score due to unknown items.<br>Therefore the NIH total score will be set to missing. |
|               | 19-010 | Month 6: Barthel Index<br>Implausible item 'Stairs' (documented response Stairs = 15; allowed: 0,5,10).<br>Documented Barthel Index = 95.                 | Item 'Stairs' and Barthel Index set to missing due to implausible item 'Stairs'.                   |

I hereby confirm that the above listed data issues cannot be resolved before database closure and will be handled as outlined in this document.

Prof. Dr. Meinhard Kieser  
Responsible Biometrician

02.03.2015   
Date and signature of the responsible Biometrician

Anja Sander  
Representative of the responsible Biometrician

02.03.2015   
Date and signature of the representative of the responsible Biometrician

Prof. Dr. med Uta Meyding-Lamadé  
Coordinating Investigator

5.3.2015   
Date and signature of the Coordinating Investigator

Prof. Dr. med. Werner Hacke  
Sponsor

17.3.2015   
Date and signature of the Sponsor
